# Supplementary material for: Construction of a high-density linkage map and QTL mapping for important agronomic traits in Stylosanthes guianensis (Aubl.) Sw
Source: PubMed Central journal article supplement (PMC6405868; doi:10.1038/s41598-019-40489-7), 2019-03-07
Supplement: 41598_2019_40489_MOESM1_ESM.pdf [file 41598_2019_40489_MOESM1_ESM.pdf]

**Construction of a high-density linkage map and QTL mapping  
for important agronomic traits in *Stylosanthes guianensis* (Aubl.)**

Sw.

Yan-Qiong Tang<sup>1\*</sup>, Zhi-Qiang Xia<sup>2\*</sup>, Ze-Ting Ding<sup>1\*</sup>, Ya-Cao Ding<sup>1</sup>, Zhu Liu<sup>1</sup>, Xiang Ma<sup>1</sup> &  
Jin-Ping Liu<sup>1</sup>

<sup>1</sup>Hainan Key Laboratory for Sustainable Utilization of Tropical Bioresources, Tropical Agriculture and Forestry Institute, Hainan University, Haikou, Hainan Province 570228, China. <sup>2</sup>The Institute of Tropical Bioscience and Biotechnology, Chinese Academy of Tropical Agricultural Sciences, Haikou, Hainan Province 571101, China

Correspondence and requests for materials should be addressed to Y.-Q. T. (tyq68@126.com) or J.-P. L. (liu3305602@163.com)

\* These authors contributed equally to this work.

**Table S1.** List of SNP markers used to create the linkage groups of *Stylosanthes guianensis*.

| S/n | Group | Locus              | Position (cM) |
|-----|-------|--------------------|---------------|
| 1   | 1     | T13425c0gli1_17_G_ | 0             |
| 2   | 1     | T13425c0gli1_13_C_ | 0.1682        |
| 3   | 1     | T13425c0gli1_14_C_ | 0.2017        |
| 4   | 1     | T13586c0g2i1_1_A_T | 5.4569        |
| 5   | 1     | T3030c0gli1_24_A_T | 6.5703        |
| 6   | 1     | T13228c0gli1_29_A_ | 7.5141        |
| 7   | 1     | T12234c5g2i3_19_A_ | 8.4412        |
| 8   | 1     | T12279c5g4i1_16_A_ | 9.3887        |
| 9   | 1     | T4421c0gli1_19_A_T | 9.9981        |
| 10  | 1     | T3475c0gli1_174_A_ | 10.4633       |
| 11  | 1     | T7914c1g6i1_30_A_T | 10.6726       |
| 12  | 1     | T7913c3gli2_60_A_T | 11.2529       |
| 13  | 1     | T3914c0gli1_19_A_T | 11.6691       |
| 14  | 1     | T12222c0gli1_28_A_ | 12.0906       |
| 15  | 1     | T8758c0gli1_1_A_T  | 12.3259       |
| 16  | 1     | T7034c5g2i5_1_A_T  | 12.5455       |
| 17  | 1     | T12676c0gli1_20_A_ | 12.7421       |
| 18  | 1     | T2995c0gli1_29_A_T | 13.134        |
| 19  | 1     | T5072c0gli1_32_A_T | 13.81         |
| 20  | 1     | T9482c0g6i1_23_A_T | 14.4405       |
| 21  | 1     | T1313c2gli1_4_A_T  | 14.8415       |
| 22  | 1     | T1440c0g2i1_1_A_T  | 15.0287       |
| 23  | 1     | T8732c4g2i2_1_A_T  | 15.239        |
| 24  | 1     | T7844c5g8i1_1_A_T  | 15.4183       |
| 25  | 1     | T4773c0gli1_255_GA | 15.6741       |
| 26  | 1     | T1638c0gli1_1_A_T  | 16.3007       |
| 27  | 1     | T7194c0gli1_1_A_T  | 16.4782       |
| 28  | 1     | T8708c2g2i2_1_A_T  | 17.2751       |
| 29  | 1     | T5506c0gli1_1_A_T  | 17.9511       |
| 30  | 1     | T6690c0gli1_1_A_T  | 18.9607       |
| 31  | 1     | T11142c0gli1_1_A_T | 19.4714       |
| 32  | 1     | T10321c1gli1_1_A_T | 19.6047       |
| 33  | 1     | T9960c0gli2_2_A_T  | 19.7795       |
| 34  | 1     | T10065c0gli1_1_A_T | 20.1329       |
| 35  | 1     | T3873c1g2i1_1_A_T  | 20.7032       |
| 36  | 1     | T10378c1gli1_348_G | 22.0134       |
| 37  | 1     | T10915c0gli1_1_A_T | 23.4326       |
| 38  | 1     | T7063c0gli1_1_A_T  | 23.6624       |
| 39  | 1     | T12273c0g3i1_1_A_T | 24.3024       |
| 40  | 1     | T7504c0g2i1_1_A_T  | 24.7088       |
| 41  | 1     | T2494c0gli1_1_A_T  | 24.8258       |
| 42  | 1     | T10904c0gli1_1_A_T | 25.08         |

|    |   |                    |         |
|----|---|--------------------|---------|
| 43 | 1 | T13425c0gli1_1_A_T | 25.7599 |
| 44 | 1 | T1593c0gli1_1_A_T  | 26.4888 |
| 45 | 1 | T11961c3gli6_1_A_T | 26.7683 |
| 46 | 1 | T3967c0g2i1_1_A_T  | 27.2589 |
| 47 | 1 | T8065c0gli1_1_A_T  | 27.3571 |
| 48 | 1 | T13023c0gli1_1_A_T | 27.6356 |
| 49 | 1 | T10743c0gli1_1_A_T | 27.926  |
| 50 | 1 | T624c0gli1_1_A_T   | 28.528  |
| 51 | 1 | T7978c25g10i1_1_A_ | 28.9685 |
| 52 | 1 | T13192c4g4i1_3_A_T | 29.556  |
| 53 | 1 | T12597c0gli4_1_A_T | 29.8679 |
| 54 | 1 | T9036c0gli1_1_A_T  | 30.4076 |
| 55 | 1 | T11946c3gli1_1_A_T | 30.7639 |
| 56 | 1 | T8729c1gli1_1_A_T  | 30.9548 |
| 57 | 1 | T7329c0gli1_1_A_T  | 31.2205 |
| 58 | 1 | T11339c0gli1_32_A_ | 31.6109 |
| 59 | 1 | T199c0gli1_294_G_G | 33.363  |
| 60 | 1 | T199c0gli1_293_GG_ | 34.5013 |
| 61 | 1 | T9131c4gli1_6_G_T  | 36.1651 |
| 62 | 1 | T11641c0gli1_78_A_ | 38.5262 |
| 63 | 1 | T11641c0gli1_94_C_ | 40.0779 |
| 64 | 1 | T11641c0gli1_84_G_ | 41.6796 |
| 65 | 1 | T4377c0gli1_44_C_T | 46.319  |
| 66 | 1 | T4377c0gli1_27_T_C | 46.9108 |
| 67 | 1 | T8170c0gli1_406_CT | 50.9104 |
| 68 | 1 | T11737c0gli1_10_A_ | 53.8137 |
| 69 | 1 | T9007c0gli1_22_A_T | 54.6057 |
| 70 | 1 | T4712c1g3i1_1_A_T  | 55.4609 |
| 71 | 1 | T5144c0gli1_1_A_T  | 56.0315 |
| 72 | 1 | T10356c0gli2_1_A_T | 56.5341 |
| 73 | 1 | T2347c0gli1_1_A_T  | 56.8356 |
| 74 | 1 | T3811c0gli1_1_A_T  | 57.1369 |
| 75 | 1 | T2398c0gli1_1_A_T  | 57.5418 |
| 76 | 1 | T4653c0gli1_1_A_T  | 58.0024 |
| 77 | 1 | T6635c0gli1_1_A_T  | 58.4381 |
| 78 | 1 | T4958c0gli1_1_A_T  | 58.6837 |
| 79 | 1 | T4069c0gli1_1_A_T  | 59.1641 |
| 80 | 1 | T9450c5gli1_1_A_T  | 59.3053 |
| 81 | 1 | T10672c0gli1_1_A_T | 59.6601 |
| 82 | 1 | T11187c0gli1_1_A_T | 60.1625 |
| 83 | 1 | T2940c0g2i1_1_A_T  | 60.5478 |
| 84 | 1 | T7626c0gli1_1_A_T  | 60.8316 |
| 85 | 1 | T8720c4gli1_1_A_T  | 60.9938 |
| 86 | 1 | T478c0gli1_1_A_T   | 61.2114 |

|     |   |                    |         |
|-----|---|--------------------|---------|
| 87  | 1 | T725c0gli1_1_A_T   | 61.5711 |
| 88  | 1 | T5482c0gli1_1_A_T  | 61.8962 |
| 89  | 1 | T9976c0gli1_1_A_T  | 62.4404 |
| 90  | 1 | T12115c0gli1_3_A_T | 62.9259 |
| 91  | 1 | T12306c2g2i1_1_A_T | 63.4169 |
| 92  | 1 | T9138c0g4i1_1_A_T  | 63.5746 |
| 93  | 1 | T2583c0gli1_1_A_T  | 64.0231 |
| 94  | 1 | T7161c0gli1_1_A_T  | 64.3519 |
| 95  | 1 | T1611c0gli1_1_A_T  | 64.4979 |
| 96  | 1 | T5927c0gli1_1_A_T  | 64.9096 |
| 97  | 1 | T7978c25g9i1_1_A_T | 65.3227 |
| 98  | 1 | T5895c0gli1_33_A_T | 65.9788 |
| 99  | 1 | T721c0gli1_1_A_T   | 66.4731 |
| 100 | 1 | T8205c0gli1_1_A_T  | 66.8011 |
| 101 | 1 | T8773c0g2i4_1_A_T  | 67.2731 |
| 102 | 1 | T13192c4gli1_1_A_T | 67.6987 |
| 103 | 1 | T6881c0gli1_1_A_T  | 67.8878 |
| 104 | 1 | T10621c0gli1_1_A_T | 68.1082 |
| 105 | 1 | T580c0gli1_3_A_T   | 68.6171 |
| 106 | 1 | T6533c0gli1_1_A_T  | 69.4645 |
| 107 | 1 | T8284c0gli1_66_A_T | 70.205  |
| 108 | 1 | T3647c0gli1_1_A_T  | 70.7947 |
| 109 | 1 | T9435c11g13i1_36_A | 71.6277 |
| 110 | 1 | T3877c0gli1_1_A_T  | 72.2638 |
| 111 | 1 | T5339c0gli1_28_A_T | 72.7733 |
| 112 | 1 | T9066c0gli1_1_A_T  | 73.1646 |
| 113 | 1 | T2840c0gli1_1_A_T  | 73.2989 |
| 114 | 1 | T6628c0gli1_1_A_T  | 73.7084 |
| 115 | 1 | T4716c0gli1_1_A_T  | 74.0663 |
| 116 | 1 | T5037c2gli1_37_A_T | 74.5879 |
| 117 | 1 | T1298c3g2i1_1_A_T  | 75.0925 |
| 118 | 1 | T64c0gli1_1_A_T    | 75.7167 |
| 119 | 1 | T9456c5g2i1_1_A_T  | 76.0247 |
| 120 | 1 | T9581c0gli1_1_A_T  | 76.3386 |
| 121 | 1 | T12797c0gli1_1_A_T | 76.5894 |
| 122 | 1 | T10802c0gli1_3_A_T | 76.8782 |
| 123 | 1 | T11798c0gli1_1_A_T | 77.0726 |
| 124 | 1 | T3828c0gli1_1_A_T  | 77.3216 |
| 125 | 1 | T7882c14gli2_1_A_T | 77.644  |
| 126 | 1 | T2063c0gli1_1_A_T  | 77.9996 |
| 127 | 1 | T9511c3g2i2_1_A_T  | 78.2409 |
| 128 | 1 | T8333c0gli1_1_A_T  | 78.3582 |
| 129 | 1 | T3818c0gli1_1_A_T  | 78.6615 |
| 130 | 1 | T10582c0gli1_1_A_T | 79.125  |

|     |   |                    |         |
|-----|---|--------------------|---------|
| 131 | 1 | T9499c0gli1_1_A_T  | 79.9359 |
| 132 | 1 | T7878c1gli1_1_A_T  | 80.4986 |
| 133 | 1 | T10809c0gli1_1_A_T | 80.5852 |
| 134 | 1 | T12256c3g5i2_1_A_T | 80.7528 |
| 135 | 1 | T12687c0gli1_1_A_T | 81.1835 |
| 136 | 1 | T7014c2g9i1_1_A_T  | 81.6887 |
| 137 | 1 | T9946c2g3i1_1_A_T  | 81.9729 |
| 138 | 1 | T7870c0gli1_1_A_T  | 82.4462 |
| 139 | 1 | T1888c0gli1_1_A_T  | 82.739  |
| 140 | 1 | T590c0gli1_1_A_T   | 83.0324 |
| 141 | 1 | T4083c0gli1_1_A_T  | 83.2991 |
| 142 | 1 | T12261c0gli1_1_A_T | 83.7401 |
| 143 | 1 | T11738c0gli1_1_A_T | 84.0645 |
| 144 | 1 | T13160c0g2i1_1_A_T | 84.2303 |
| 145 | 1 | T3711c0gli1_1_A_T  | 84.4826 |
| 146 | 1 | T1954c0gli1_1_A_T  | 84.8124 |
| 147 | 1 | T11495c0gli1_1_A_T | 85.2652 |
| 148 | 1 | T9598c0gli1_1_A_T  | 85.4733 |
| 149 | 1 | T2273c0gli1_1_A_T  | 85.8119 |
| 150 | 1 | T585c0gli1_1_A_T   | 86.029  |
| 151 | 1 | T11917c0gli1_3_A_T | 86.2797 |
| 152 | 1 | T9195c0gli1_1_A_T  | 86.5657 |
| 153 | 1 | T231c0gli1_1_A_T   | 86.9799 |
| 154 | 1 | T10818c0gli1_1_A_T | 87.1906 |
| 155 | 1 | T892c0gli1_1_A_T   | 87.4919 |
| 156 | 1 | T13647c0gli1_1_A_T | 87.7224 |
| 157 | 1 | T13496c0gli1_1_A_T | 87.8603 |
| 158 | 1 | T4876c0gli1_1_A_T  | 88.0346 |
| 159 | 1 | T9143c0gli1_1_A_T  | 88.4952 |
| 160 | 1 | T11000c0gli1_1_A_T | 88.8835 |
| 161 | 1 | T7978c25g6i1_1_A_T | 89.2189 |
| 162 | 1 | T13788c0gli1_1_A_T | 89.3319 |
| 163 | 1 | T2509c0gli1_1_A_T  | 89.5692 |
| 164 | 1 | T12338c0gli1_1_A_T | 89.7455 |
| 165 | 1 | T3136c0gli1_1_A_T  | 90.2216 |
| 166 | 1 | T995c0gli1_1_A_T   | 90.634  |
| 167 | 1 | T7692c0gli1_1_A_T  | 91.057  |
| 168 | 1 | T13238c0gli1_1_A_T | 91.3471 |
| 169 | 1 | T123c1gli1_25_A_T  | 91.4822 |
| 170 | 1 | T1700c0gli1_1_A_T  | 91.7234 |
| 171 | 1 | T482c0gli1_1_A_T   | 92.07   |
| 172 | 1 | T1459c0g4i1_1_A_T  | 92.5152 |
| 173 | 1 | T640c0gli1_1_A_T   | 92.841  |
| 174 | 1 | T8727c4gli1_1_A_T  | 93.2072 |

|     |   |                    |          |
|-----|---|--------------------|----------|
| 175 | 1 | T11223c0gli1_1_A_T | 93.3742  |
| 176 | 1 | T11942c6gli1_1_A_T | 93.8483  |
| 177 | 1 | T13366c0gli1_1_A_T | 94.2846  |
| 178 | 1 | T12628c0gli1_1_A_T | 94.5508  |
| 179 | 1 | T8721c0g5i1_1_A_T  | 95.3781  |
| 180 | 1 | T4655c0gli1_1_A_T  | 95.6192  |
| 181 | 1 | T6619c0gli1_1_A_T  | 96.1476  |
| 182 | 1 | T3519c0g2i1_1_A_T  | 96.5437  |
| 183 | 1 | T10998c0gli1_1_A_T | 96.869   |
| 184 | 1 | T5039c0g2i1_3_A_T  | 97.3326  |
| 185 | 1 | T13161c1g3i1_1_A_T | 97.6695  |
| 186 | 1 | T1211c0gli1_1_A_T  | 97.8752  |
| 187 | 1 | T1863c0gli1_1_A_T  | 98.1361  |
| 188 | 1 | T8276c0gli1_1_A_T  | 98.2028  |
| 189 | 1 | T357c0gli1_1_A_T   | 98.5248  |
| 190 | 1 | T12340c0gli1_1_A_T | 98.8157  |
| 191 | 1 | T1406c0gli1_37_A_T | 99.4516  |
| 192 | 1 | T10567c0gli1_19_A_ | 100.1047 |
| 193 | 1 | T8732c2gli1_1_A_T  | 100.5061 |
| 194 | 1 | T2113c0gli1_9_A_T  | 101.3183 |
| 195 | 1 | T6565c0gli1_4_A_T  | 102.1959 |
| 196 | 1 | T6422c0gli1_29_A_T | 103.0425 |
| 197 | 1 | T147c0gli1_1_A_T   | 103.4755 |
| 198 | 1 | T7701c0gli1_29_A_T | 104.2374 |
| 199 | 1 | T113c0gli1_30_A_T  | 105.4691 |
| 200 | 1 | T4886c1gli1_27_A_T | 105.9337 |
| 201 | 1 | T12383c0gli1_28_A_ | 106.3356 |
| 202 | 1 | T10631c0gli1_34_A_ | 107.1132 |
| 203 | 1 | T11915c0gli1_1_A_T | 108.2235 |
| 204 | 1 | T5573c0gli1_1_A_T  | 108.3737 |
| 205 | 1 | T3845c0gli1_1_A_T  | 108.9024 |
| 206 | 1 | T13027c0gli1_26_A_ | 109.5019 |
| 207 | 1 | T6969c2gli1_27_A_T | 109.8114 |
| 208 | 1 | T10812c0gli1_22_A_ | 110.6182 |
| 209 | 1 | T7802c0gli1_21_A_T | 111.5529 |
| 210 | 1 | T10228c0gli1_1_A_T | 112.3633 |
| 211 | 1 | T9796c0g2i1_1_A_T  | 112.6674 |
| 212 | 1 | T1128c0gli1_25_A_T | 113.1488 |
| 213 | 1 | T11926c2gli1_1_A_T | 113.4691 |
| 214 | 1 | T6868c0gli1_1_A_T  | 113.8502 |
| 215 | 1 | T6991c0g2i1_1_A_T  | 114.1438 |
| 216 | 1 | T9232c0gli1_1_A_T  | 114.5218 |
| 217 | 1 | T7955c0g2i1_1_A_T  | 114.9205 |
| 218 | 1 | T10636c0gli1_1_A_T | 115.1577 |

|     |   |                    |          |
|-----|---|--------------------|----------|
| 219 | 1 | T11697c1g2i1_1_A_T | 115.2695 |
| 220 | 1 | T3494c0gli1_1_A_T  | 115.6167 |
| 221 | 1 | T5434c0gli1_1_A_T  | 116.1497 |
| 222 | 1 | T8576c0gli1_1_A_T  | 116.5632 |
| 223 | 1 | T12561c0g2i1_1_A_T | 116.6844 |
| 224 | 1 | T912c0gli1_1_A_T   | 117.0416 |
| 225 | 1 | T2807c0gli1_1_A_T  | 117.3197 |
| 226 | 1 | T2412c0gli1_1_A_T  | 117.8264 |
| 227 | 1 | T10664c0gli1_3_A_T | 118.2239 |
| 228 | 1 | T8827c0gli1_1_A_T  | 118.4117 |
| 229 | 1 | T9202c0gli1_3_A_T  | 118.7217 |
| 230 | 1 | T12969c0gli1_71_A_ | 119.0545 |
| 231 | 1 | T641c0gli1_1_A_T   | 119.4185 |
| 232 | 1 | T1443c0gli1_1_A_T  | 119.9892 |
| 233 | 1 | T8839c0gli1_22_A_T | 120.8235 |
| 234 | 1 | T3729c0gli1_1_A_T  | 121.7078 |
| 235 | 1 | T9805c0g2i1_1_A_T  | 122.29   |
| 236 | 1 | T11997c7g2i1_1_A_T | 122.8101 |
| 237 | 1 | T5059c0gli1_1_A_T  | 123.0196 |
| 238 | 1 | T8594c0gli1_1_A_T  | 123.3629 |
| 239 | 1 | T2067c0gli1_59_A_T | 123.9805 |
| 240 | 1 | T13110c0gli1_1_A_T | 125.0245 |
| 241 | 1 | T9479c3gli1_1_A_T  | 125.7187 |
| 242 | 1 | T5090c0gli1_1_A_T  | 125.8457 |
| 243 | 1 | T12389c0gli1_1_A_T | 126.0514 |
| 244 | 1 | T12223c1lg2i1_1_A_ | 126.2826 |
| 245 | 1 | T9781c0g3i1_1_A_T  | 126.7487 |
| 246 | 1 | T6076c0gli1_1_A_T  | 127.0774 |
| 247 | 1 | T1494c0gli1_1_A_T  | 127.5167 |
| 248 | 1 | T12098c0gli1_77_A_ | 128.0097 |
| 249 | 1 | T12691c0gli1_2_A_T | 128.984  |
| 250 | 1 | T10854c0gli1_1_A_T | 130.1994 |
| 251 | 1 | T2330c0gli1_1_A_T  | 130.8652 |
| 252 | 1 | T9000c0gli1_1_A_T  | 130.9534 |
| 253 | 1 | T13509c0gli1_7_A_T | 131.7067 |
| 254 | 1 | T3181c0gli1_1_A_T  | 131.8552 |
| 255 | 1 | T4171c0gli1_1_A_T  | 132.2653 |
| 256 | 1 | T13200c3g2i1_1_A_T | 132.6488 |
| 257 | 1 | T5405c0gli1_1_A_T  | 132.7618 |
| 258 | 1 | T3399c0gli2_3_A_T  | 133.3085 |
| 259 | 1 | T1396c0gli1_29_A_T | 134.2819 |
| 260 | 1 | T2000c0gli1_28_A_T | 135.0398 |
| 261 | 1 | T7926c2g3i1_1_A_T  | 135.5929 |
| 262 | 1 | T2588c0g2i1_1_A_T  | 136.0142 |

|     |   |                    |          |
|-----|---|--------------------|----------|
| 263 | 1 | T12517c0gli1_1_A_T | 136.324  |
| 264 | 1 | T5588c0gli1_1_A_T  | 136.6686 |
| 265 | 1 | T3483c0gli1_6_A_T  | 136.8182 |
| 266 | 1 | T2500c0gli1_1_A_T  | 137.3082 |
| 267 | 1 | T725c0g2i1_1_A_T   | 137.6906 |
| 268 | 1 | T6708c0g2i1_1_A_T  | 137.8719 |
| 269 | 1 | T1483c1gli1_17_A_T | 138.3662 |
| 270 | 1 | T10467c0gli1_1_A_T | 138.7973 |
| 271 | 1 | T1580c0gli1_1_A_T  | 138.9319 |
| 272 | 1 | T9435c7g3i1_1_A_T  | 139.1168 |
| 273 | 1 | T7901c1gli1_1_A_T  | 139.3034 |
| 274 | 1 | T12292c10gli4_1_A_ | 139.5857 |
| 275 | 1 | T12949c0gli1_1_A_T | 140      |
| 276 | 1 | T10554c0gli1_1_A_T | 140.3708 |
| 277 | 1 | T1960c0gli1_1_A_T  | 140.6842 |
| 278 | 1 | T12006c8g2i1_1_A_T | 140.9752 |
| 279 | 1 | T2708c0gli1_1_A_T  | 141.3825 |
| 280 | 1 | T12306c2gli1_1_A_T | 141.5367 |
| 281 | 1 | T8868c0gli1_1_A_T  | 141.8932 |
| 282 | 1 | T13161c1g5i1_1_A_T | 142.2907 |
| 283 | 1 | T2271c0gli1_1_A_T  | 142.645  |
| 284 | 1 | T9205c0gli1_1_A_T  | 142.9123 |
| 285 | 1 | T12825c0g2i3_1_A_T | 143.2888 |
| 286 | 1 | T10775c0gli1_1_A_T | 143.6224 |
| 287 | 1 | T13698c0gli1_1_A_T | 144.0159 |
| 288 | 1 | T6346c0gli1_13_A_T | 144.1878 |
| 289 | 1 | T3303c0gli1_1_A_T  | 144.8373 |
| 290 | 1 | T3327c1gli1_1_A_T  | 144.9155 |
| 291 | 1 | T7918c6g19i1_1_A_T | 145.0565 |
| 292 | 1 | T9473c0g2i2_1_A_T  | 145.2301 |
| 293 | 1 | T7886c1g5i1_1_A_T  | 145.4914 |
| 294 | 1 | T3524c0gli1_1_A_T  | 145.6223 |
| 295 | 1 | T8852c0gli1_1_A_T  | 145.9536 |
| 296 | 1 | T9801c0gli1_1_A_T  | 146.6466 |
| 297 | 1 | T955c0gli1_1_A_T   | 147.2338 |
| 298 | 1 | T3843c0gli1_1_A_T  | 147.6426 |
| 299 | 1 | T96c0gli1_1_A_T    | 147.9823 |
| 300 | 1 | T8097c0gli1_1_A_T  | 148.1543 |
| 301 | 1 | T12932c0gli1_1_A_T | 148.368  |
| 302 | 1 | T6274c0gli1_1_A_T  | 148.6642 |
| 303 | 1 | T8765c11g4i1_1_A_T | 149.0209 |
| 304 | 1 | T6924c0g2i1_1_A_T  | 149.3323 |
| 305 | 1 | T7715c0gli1_1_A_T  | 149.531  |
| 306 | 1 | T5155c0gli1_1_A_T  | 149.7358 |



|     |   |                    |          |
|-----|---|--------------------|----------|
| 307 | 1 | T8902c0gli1_1_A_T  | 150.1024 |
| 308 | 1 | T11962c1g2i1_1_A_T | 150.3635 |
| 309 | 1 | T6518c0gli1_1_A_T  | 150.8592 |
| 310 | 1 | T7035c2gli1_1_A_T  | 151.3643 |
| 311 | 1 | T659c0gli1_1_A_T   | 151.5623 |
| 312 | 1 | T8715c0gli1_1_A_T  | 151.7889 |
| 313 | 1 | T2358c0gli1_1_A_T  | 151.9226 |
| 314 | 1 | T5322c0gli1_1_A_T  | 152.2072 |
| 315 | 1 | T5040c0gli1_1_A_T  | 152.3667 |
| 316 | 1 | T4676c1gli1_1_A_T  | 152.7954 |
| 317 | 1 | T11109c0gli1_1_A_T | 152.976  |
| 318 | 1 | T6693c0gli1_1_A_T  | 153.3965 |
| 319 | 1 | T11739c0gli1_1_A_T | 153.662  |
| 320 | 1 | T5534c0gli2_1_A_T  | 153.7855 |
| 321 | 1 | T6943c1gli1_1_A_T  | 154.012  |
| 322 | 1 | T5345c0gli1_1_A_T  | 154.3901 |
| 323 | 1 | T11688c3g2i1_1_A_  | 154.6548 |
| 324 | 1 | T11688c3g29i1_1_A_ | 154.9431 |
| 325 | 1 | T9511c3g2i3_1_A_T  | 155.1664 |
| 326 | 1 | T12255c1gli1_1_A_T | 155.3048 |
| 327 | 1 | T8241c0gli1_1_A_T  | 155.6812 |
| 328 | 1 | T10658c0gli1_1_A_T | 156.0203 |
| 329 | 1 | T944c0gli1_1_A_T   | 156.1656 |
| 330 | 1 | T8581c0gli1_1_A_T  | 156.3297 |
| 331 | 1 | T5458c0gli1_1_A_T  | 156.6179 |
| 332 | 1 | T9790c0g24i1_1_A_T | 156.8765 |
| 333 | 1 | T5786c0gli1_1_A_T  | 157.3618 |
| 334 | 1 | T9461c0gli1_1_A_T  | 157.8958 |
| 335 | 1 | T11586c3gli1_1_A_T | 158.1344 |
| 336 | 1 | T2245c0gli1_1_A_T  | 158.2225 |
| 337 | 1 | T6008c0gli1_1_A_T  | 158.2836 |
| 338 | 1 | T6500c0gli1_1_A_T  | 158.7216 |
| 339 | 1 | T2067c0g2i1_1_A_T  | 158.9326 |
| 340 | 1 | T7362c0gli1_1_A_T  | 159.0115 |
| 341 | 1 | T2891c0gli1_1_A_T  | 159.1524 |
| 342 | 1 | T9245c0gli1_1_A_T  | 159.4308 |
| 343 | 1 | T7600c0gli1_1_A_T  | 159.6716 |
| 344 | 1 | T1299c1gli1_1_A_T  | 159.8697 |
| 345 | 1 | T8990c0gli1_1_A_T  | 160.2984 |
| 346 | 1 | T6924c0gli1_1_A_T  | 160.4    |
| 347 | 1 | T7765c0gli1_1_A_T  | 160.6733 |
| 348 | 1 | T1083c0gli1_1_A_T  | 160.9201 |
| 349 | 1 | T1203c0gli1_1_A_T  | 161.0725 |
| 350 | 1 | T303c0gli1_1_A_T   | 161.2757 |

|     |   |                    |          |
|-----|---|--------------------|----------|
| 351 | 1 | T7882c14g7i1_1_A_T | 161.5294 |
| 352 | 1 | T6863c0gli1_1_A_T  | 161.7989 |
| 353 | 1 | T8093c0gli1_1_A_T  | 162.0883 |
| 354 | 1 | T8008c2gli1_1_A_T  | 162.3853 |
| 355 | 1 | T7906c1gli2_1_A_T  | 162.7365 |
| 356 | 1 | T11866c0gli1_1_A_T | 163.1054 |
| 357 | 1 | T8124c0gli1_1_A_T  | 163.5022 |
| 358 | 1 | T10547c0gli1_1_A_T | 163.8815 |
| 359 | 1 | T4250c0gli1_1_A_T  | 164.4317 |
| 360 | 1 | T4053c0gli1_1_A_T  | 164.865  |
| 361 | 1 | T8849c0gli1_1_A_T  | 165.0554 |
| 362 | 1 | T1782c0gli1_1_A_T  | 165.3624 |
| 363 | 1 | T4724c0gli1_1_A_T  | 165.5779 |
| 364 | 1 | T469c0gli1_1_A_T   | 165.7866 |
| 365 | 1 | T5342c0gli1_1_A_T  | 166.0489 |
| 366 | 1 | T3793c0gli1_1_A_T  | 166.2173 |
| 367 | 1 | T1936c0gli1_1_A_T  | 166.5704 |
| 368 | 1 | T12158c0gli1_1_A_T | 166.9407 |
| 369 | 1 | T9204c0gli1_1_A_T  | 167.2982 |
| 370 | 1 | T6965c0g2i1_1_A_T  | 167.5826 |
| 371 | 1 | T613c0gli1_1_A_T   | 167.9108 |
| 372 | 1 | T8178c0gli1_1_A_T  | 168.165  |
| 373 | 1 | T5454c1gli1_1_A_T  | 168.5598 |
| 374 | 1 | T12645c0gli1_26_A_ | 169.0019 |
| 375 | 1 | T10706c0gli1_1_A_T | 169.3819 |
| 376 | 1 | T4723c0gli1_1_A_T  | 169.565  |
| 377 | 1 | T5352c0gli1_1_A_T  | 169.7434 |
| 378 | 1 | T439c0gli1_1_A_T   | 169.9762 |
| 379 | 1 | T11752c0gli1_1_A_T | 170.1862 |
| 380 | 1 | T9024c0gli1_3_A_T  | 170.5583 |
| 381 | 1 | T6278c0gli1_28_A_T | 171.5189 |
| 382 | 1 | T3731c0g2i1_1_A_T  | 172.1675 |
| 383 | 1 | T10020c0g2i1_1_A_T | 172.6715 |
| 384 | 1 | T2670c0gli1_1_A_T  | 173.6484 |
| 385 | 1 | T5072c0gli2_32_A_T | 174.2272 |
| 386 | 1 | T13182c2gli1_1_A_T | 174.4737 |
| 387 | 1 | T9479c3g4i1_6_T_A  | 174.9167 |
| 388 | 1 | T8029c0gli1_1_A_T  | 175.0583 |
| 389 | 1 | T9956c1gli1_1_A_T  | 175.2835 |
| 390 | 1 | T1677c0gli1_1_A_T  | 175.478  |
| 391 | 1 | T1440c0gli1_1_A_T  | 175.701  |
| 392 | 1 | T11015c0gli2_1_A_T | 176.9025 |
| 393 | 1 | T265c0gli1_1_A_T   | 177.6553 |
| 394 | 1 | T7961c0g3i1_1_A_T  | 178.0211 |

|     |   |                    |          |
|-----|---|--------------------|----------|
| 395 | 1 | T12305c0gli1_1_A_T | 178.1169 |
| 396 | 1 | T12312c1g4i1_1_A_T | 178.4753 |
| 397 | 1 | T3371c0g2i1_1_A_T  | 178.9391 |
| 398 | 1 | T12985c0gli1_1_A_T | 179.0026 |
| 399 | 1 | T13168c0gli2_1_A_T | 179.4804 |
| 400 | 1 | T7882c14g5i3_2_AAT | 180.1881 |
| 401 | 1 | T7882c14g5i3_5_TC_ | 180.2742 |
| 402 | 1 | T12223c11gli1_1_A_ | 180.8231 |
| 403 | 1 | T4868c0gli1_1_A_T  | 180.9488 |
| 404 | 1 | T3813c0gli1_1_A_T  | 181.5446 |
| 405 | 1 | T3086c0g2i1_1_A_T  | 181.8221 |
| 406 | 1 | T4080c0gli1_1_A_T  | 182.1055 |
| 407 | 1 | T12232c4gli1_1_A_T | 182.5938 |
| 408 | 1 | T1536c1gli1_1_A_T  | 182.8227 |
| 409 | 1 | T11042c0gli1_3_A_T | 183.1951 |
| 410 | 1 | T9134c1gli2_1_A_T  | 183.3553 |
| 411 | 1 | T5431c0gli1_1_A_T  | 183.838  |
| 412 | 1 | T10023c0gli1_1_A_T | 184.3475 |
| 413 | 1 | T5474c0gli1_1_A_T  | 185.0317 |
| 414 | 1 | T1021c0gli1_1_A_T  | 185.6489 |
| 415 | 1 | T2107c0gli1_13_A_T | 186.0186 |
| 416 | 1 | T10608c0gli1_1_A_T | 186.299  |
| 417 | 1 | T341c0gli1_1_A_T   | 186.6536 |
| 418 | 1 | T627c0gli1_1_A_T   | 187.2302 |
| 419 | 1 | T4842c0gli1_1_A_T  | 187.6378 |
| 420 | 1 | T2666c0gli1_1_A_T  | 187.7977 |
| 421 | 1 | T12408c0gli1_1_A_T | 187.9978 |
| 422 | 1 | T4073c0gli1_1_A_T  | 188.3706 |
| 423 | 1 | T8014c0g2i2_1_A_T  | 188.4448 |
| 424 | 1 | T9100c0gli2_1_A_T  | 188.9219 |
| 425 | 1 | T4441c0gli1_1_A_T  | 189.3755 |
| 426 | 1 | T6114c0gli1_1_A_T  | 189.51   |
| 427 | 1 | T1395c0gli1_1_A_T  | 189.8383 |
| 428 | 1 | T7587c0gli1_1_A_T  | 190.288  |
| 429 | 1 | T13182c2g8i1_1_A_T | 190.4006 |
| 430 | 1 | T12223c10gli1_1_A_ | 190.6179 |
| 431 | 1 | T1885c0gli1_1_A_T  | 190.8216 |
| 432 | 1 | T5340c0gli1_1_A_T  | 191.1502 |
| 433 | 1 | T8721c0g2i1_1_A_T  | 191.7472 |
| 434 | 1 | T4494c0gli1_1_A_T  | 192.1409 |
| 435 | 1 | T4429c0g2i1_1_A_T  | 192.4643 |
| 436 | 1 | T1073c0gli1_1_A_T  | 192.5206 |
| 437 | 1 | T5280c0gli1_3_A_T  | 193.0458 |
| 438 | 1 | T11971c2g11i1_13_A | 193.4146 |

|     |   |                    |          |
|-----|---|--------------------|----------|
| 439 | 1 | T722c0gli1_1_A_T   | 193.8274 |
| 440 | 1 | T1729c0gli1_1_A_T  | 194.1567 |
| 441 | 1 | T12178c0gli1_29_A_ | 194.7099 |
| 442 | 1 | T12062c0gli1_29_A_ | 195.2267 |
| 443 | 1 | T11161c0gli1_1_A_T | 195.5573 |
| 444 | 1 | T5983c0gli2_1_A_T  | 195.9481 |
| 445 | 1 | T5158c0gli1_1_A_T  | 196.2756 |
| 446 | 1 | T9436c6g7i3_37_A_T | 196.6237 |
| 447 | 1 | T11997c7g6i1_1_A_T | 196.9847 |
| 448 | 1 | T6415c0gli1_1_A_T  | 197.4196 |
| 449 | 1 | T7472c0gli1_1_A_T  | 197.5551 |
| 450 | 1 | T3661c0gli1_1_A_T  | 197.8147 |
| 451 | 1 | T2526c0gli1_1_A_T  | 198.4003 |
| 452 | 1 | T3212c0gli1_1_A_T  | 198.8301 |
| 453 | 1 | T9214c0gli1_1_A_T  | 199.1834 |
| 454 | 1 | T10112c0g3i1_1_A_T | 199.4739 |
| 455 | 1 | T7923c0g2i2_1_A_T  | 199.9378 |
| 456 | 1 | T12137c1gli1_1_A_T | 200.126  |
| 457 | 1 | T6321c0gli1_1_A_T  | 200.8618 |
| 458 | 1 | T4261c0g2i1_3_A_T  | 201.6425 |
| 459 | 1 | T9508c0gli1_1_A_T  | 202.4425 |
| 460 | 1 | T2121c0gli1_1_A_T  | 202.9885 |
| 461 | 1 | T2548c0gli1_1_A_T  | 203.3229 |
| 462 | 1 | T2152c0g2i1_1_A_T  | 203.6041 |
| 463 | 1 | T12972c0gli1_1_A_T | 204.084  |
| 464 | 1 | T5424c0gli1_1_A_T  | 204.5128 |
| 465 | 1 | T12279c8gli1_1_A_T | 204.8731 |
| 466 | 1 | T6854c0gli1_1_A_T  | 205.0547 |
| 467 | 1 | T533c0gli1_1_A_T   | 205.2174 |
| 468 | 1 | T7906c1g2i1_1_A_T  | 205.5842 |
| 469 | 1 | T95c0gli1_1_A_T    | 205.839  |
| 470 | 1 | T6465c0gli1_1_A_T  | 206.0063 |
| 471 | 1 | T6069c0gli1_1_A_T  | 206.3494 |
| 472 | 1 | T11779c0gli1_1_A_T | 206.4396 |
| 473 | 1 | T4081c0gli1_1_A_T  | 206.8024 |
| 474 | 1 | T10758c0gli1_1_A_T | 206.9915 |
| 475 | 1 | T13784c0gli1_28_A_ | 207.419  |
| 476 | 1 | T1233c0gli1_1_A_T  | 207.9361 |
| 477 | 1 | T8219c0gli1_1_A_T  | 208.2206 |
| 478 | 1 | T11561c0g2i1_1_A_T | 208.4533 |
| 479 | 1 | T6623c0gli1_1_A_T  | 208.6198 |
| 480 | 1 | T9126c2gli1_1_A_T  | 208.878  |
| 481 | 1 | T9511c3g2i4_1_A_T  | 209.3174 |
| 482 | 1 | T11953c6g6i1_1_A_T | 209.5123 |

|     |   |                     |          |
|-----|---|---------------------|----------|
| 483 | 1 | T1428c0gli1_1_A_T   | 209.5384 |
| 484 | 1 | T11688c3gl15il_1_A_ | 209.8562 |
| 485 | 1 | T4657c0gli1_1_A_T   | 210.3182 |
| 486 | 1 | T77c0gli1_1_A_T     | 210.7056 |
| 487 | 1 | T5894c0gli1_1_A_T   | 211.0456 |
| 488 | 1 | T11466c0gli1_1_A_T  | 211.5027 |
| 489 | 1 | T11691c0gli1_1_A_T  | 211.7339 |
| 490 | 1 | T7961c0g2il_1_A_T   | 211.8543 |
| 491 | 1 | T9801c0gli2_1_A_T   | 212.1026 |
| 492 | 1 | T13201c0g3il_1_A_T  | 212.2476 |
| 493 | 1 | T7886c1g9il_1_A_T   | 212.5297 |
| 494 | 1 | T5350c0gli1_1_A_T   | 212.9704 |
| 495 | 1 | T9826c2g20il_1_A_T  | 213.2011 |
| 496 | 1 | T5357c0gli1_1_A_T   | 213.447  |
| 497 | 1 | T5845c0gli1_1_A_T   | 213.7082 |
| 498 | 1 | T2152c0gli1_1_A_T   | 213.8697 |
| 499 | 1 | T6651c0gli1_1_A_T   | 214.2939 |
| 500 | 1 | T4465c0gli1_1_A_T   | 214.537  |
| 501 | 1 | T6599c0gli1_1_A_T   | 214.741  |
| 502 | 1 | T6342c0gli1_1_A_T   | 215.0256 |
| 503 | 1 | T13192c4g3i5_1_A_T  | 215.1741 |
| 504 | 1 | T7303c0gli1_1_A_T   | 215.4242 |
| 505 | 1 | T11539c0gli1_1_A_T  | 215.5977 |
| 506 | 1 | T2342c0gli1_1_A_T   | 215.8941 |
| 507 | 1 | T2694c0gli1_1_A_T   | 216.1459 |
| 508 | 1 | T6655c0gli1_1_A_T   | 216.3917 |
| 509 | 1 | T11614c0gli1_1_A_T  | 216.82   |
| 510 | 1 | T1056c0gli1_1_A_T   | 216.9334 |
| 511 | 1 | T8108c0gli1_1_A_T   | 217.1682 |
| 512 | 1 | T11762c0gli1_1_A_T  | 217.328  |
| 513 | 1 | T10268c0gli1_1_A_T  | 217.6945 |
| 514 | 1 | T6877c0gli1_1_A_T   | 217.9125 |
| 515 | 1 | T586c0gli1_1_A_T    | 218.2532 |
| 516 | 1 | T2821c0gli1_1_A_T   | 218.3731 |
| 517 | 1 | T8215c0gli1_1_A_T   | 218.6944 |
| 518 | 1 | T459c0gli1_1_A_T    | 219.1517 |
| 519 | 1 | T745c0gli1_1_A_T    | 219.2933 |
| 520 | 1 | T11496c0gli1_1_A_T  | 219.5859 |
| 521 | 1 | T6758c0gli1_1_A_T   | 219.7659 |
| 522 | 1 | T569c0gli1_1_A_T    | 220.1259 |
| 523 | 1 | T940c0gli1_1_A_T    | 220.3016 |
| 524 | 1 | T773c0gli1_1_A_T    | 220.549  |
| 525 | 1 | T209c0gli1_1_A_T    | 221.0097 |
| 526 | 1 | T6475c0gli1_1_A_T   | 221.4169 |

|     |   |                     |          |
|-----|---|---------------------|----------|
| 527 | 1 | T10452c0g3i1_1_A_T  | 221.7126 |
| 528 | 1 | T1916c0gli1_1_A_T   | 222.2824 |
| 529 | 1 | T7108c0gli1_1_A_T   | 222.5531 |
| 530 | 1 | T2458c0gli1_1_A_T   | 222.8153 |
| 531 | 1 | T8558c0gli1_1_A_T   | 222.9876 |
| 532 | 1 | T9790c0gl15i1_1_A_T | 223.4218 |
| 533 | 1 | T1509c0gli1_1_A_T   | 223.8519 |
| 534 | 1 | T9781c0g2i1_1_A_T   | 224.2631 |
| 535 | 1 | T2355c0gli1_1_A_T   | 224.659  |
| 536 | 1 | T11972c4g2i1_1_A_T  | 224.943  |
| 537 | 1 | T9473c0g2i1_1_A_T   | 225.1713 |
| 538 | 1 | T9826c2g4i1_1_A_T   | 225.5912 |
| 539 | 1 | T8703c0gli1_1_A_T   | 225.8732 |
| 540 | 1 | T9687c0gli1_1_A_T   | 226.2328 |
| 541 | 1 | T9193c0gli1_1_A_T   | 226.4948 |
| 542 | 1 | T10688c0gli1_1_A_T  | 226.5949 |
| 543 | 1 | T1962c0gli1_1_A_T   | 226.6301 |
| 544 | 1 | T4929c0gli2_1_A_T   | 227.1933 |
| 545 | 1 | T7978c25g2i1_1_A_T  | 227.7859 |
| 546 | 1 | T2798c0gli1_1_A_T   | 228.2962 |
| 547 | 1 | T3492c0g2i1_1_A_T   | 228.7453 |
| 548 | 1 | T9248c0g2i1_1_A_T   | 229.1452 |
| 549 | 1 | T13190c0g3i2_1_A_T  | 229.4912 |
| 550 | 1 | T6462c1gli1_1_A_T   | 230.112  |
| 551 | 1 | T13154c0gli2_1_A_T  | 230.8285 |
| 552 | 1 | T9473c0gli1_1_A_T   | 231.153  |
| 553 | 1 | T9510c9g8i1_1_A_T   | 231.6684 |
| 554 | 1 | T8253c0gli1_1_A_T   | 232.2064 |
| 555 | 1 | T7118c0gli1_1_A_T   | 232.6743 |
| 556 | 1 | T10545c0gli1_1_A_T  | 233.3976 |
| 557 | 1 | T7022c0gli1_1_A_T   | 233.7315 |
| 558 | 1 | T471c0gli1_1_A_T    | 234.2021 |
| 559 | 1 | T4996c0g2i1_1_A_T   | 234.6693 |
| 560 | 1 | T9183c0gli1_1_A_T   | 234.9258 |
| 561 | 1 | T11958c0g4i1_1_A_T  | 235.2444 |
| 562 | 1 | T9937c0g2i1_1_A_T   | 235.6471 |
| 563 | 1 | T5024c0gli1_1_A_T   | 235.7741 |
| 564 | 1 | T12809c0gli1_1_A_T  | 236.0963 |
| 565 | 1 | T6495c0gli1_1_A_T   | 236.3415 |
| 566 | 1 | T6176c0g3i1_1_A_T   | 236.5827 |
| 567 | 1 | T3668c0gli1_1_A_T   | 236.6896 |
| 568 | 1 | T1400c0gli1_1_A_T   | 236.8478 |
| 569 | 1 | T9621c0gli1_1_A_T   | 237.1759 |
| 570 | 1 | T11936c7g6i1_18_A_  | 237.5076 |

|     |   |                    |          |
|-----|---|--------------------|----------|
| 571 | 1 | T11917c0g2i1_15_A_ | 238.5965 |
| 572 | 1 | T5523c0g2i1_3_A_T  | 239.9135 |
| 573 | 1 | T1068c0gli1_1_A_T  | 240.1916 |
| 574 | 1 | T10253c0gli1_1_A_T | 240.5023 |
| 575 | 1 | T5781c0gli1_1_A_T  | 240.6555 |
| 576 | 1 | T6445c0gli1_1_A_T  | 240.8948 |
| 577 | 1 | T1950c0gli1_1_A_T  | 241.2338 |
| 578 | 1 | T13764c0gli1_1_A_T | 241.4456 |
| 579 | 1 | T5475c0gli1_1_A_T  | 241.4908 |
| 580 | 1 | T6280c0gli1_1_A_T  | 242.0465 |
| 581 | 1 | T425c0gli1_1_A_T   | 242.8671 |
| 582 | 1 | T11110c0gli1_1_A_T | 243.2693 |
| 583 | 1 | T2329c0gli1_1_A_T  | 243.5223 |
| 584 | 1 | T6666c0gli1_1_A_T  | 243.816  |
| 585 | 1 | T7918c6g10i1_1_A_T | 244.1439 |
| 586 | 1 | T12960c0gli1_1_A_T | 244.4015 |
| 587 | 1 | T10006c1gli2_1_A_T | 244.6523 |
| 588 | 1 | T4072c0gli1_1_A_T  | 244.8198 |
| 589 | 1 | T763c0gli1_1_A_T   | 244.9702 |
| 590 | 1 | T4197c0gli1_1_A_T  | 245.0903 |
| 591 | 1 | T13161c1g2i1_1_A_T | 245.321  |
| 592 | 1 | T5439c0gli1_1_A_T  | 245.8489 |
| 593 | 1 | T5998c0gli1_1_A_T  | 246.0598 |
| 594 | 1 | T3239c0gli1_1_A_T  | 246.4762 |
| 595 | 1 | T379c0gli1_1_A_T   | 246.8727 |
| 596 | 1 | T2693c0gli1_1_A_T  | 247.1573 |
| 597 | 1 | T1893c0gli1_1_A_T  | 247.4025 |
| 598 | 1 | T13382c0g3i1_1_A_T | 247.7353 |
| 599 | 1 | T5452c0gli1_1_A_T  | 248.1499 |
| 600 | 1 | T12223c10g2i1_19_A | 248.944  |
| 601 | 2 | T12515c0gli1_26_A_ | 0        |
| 602 | 2 | T11623c0g3i1_1_A_T | 0.737    |
| 603 | 2 | T3516c0gli1_1_A_T  | 1.0204   |
| 604 | 2 | T8723c2g2i1_1_A_T  | 1.5589   |
| 605 | 2 | T8768c2gli2_1_A_T  | 1.8901   |
| 606 | 2 | T6985c1g2i1_1_A_T  | 2.0935   |
| 607 | 2 | T2701c0gli1_1_A_T  | 2.1942   |
| 608 | 2 | T7846c1gli1_1_A_T  | 2.5883   |
| 609 | 2 | T156c0gli1_1_A_T   | 2.9591   |
| 610 | 2 | T6999c3gli1_1_A_T  | 3.2301   |
| 611 | 2 | T7035c2gli3_1_A_T  | 3.7441   |
| 612 | 2 | T8965c0gli1_1_A_T  | 4.1219   |
| 613 | 2 | T7248c0gli1_1_A_T  | 4.4649   |
| 614 | 2 | T4274c0gli1_1_A_T  | 4.8375   |

|     |   |                    |         |
|-----|---|--------------------|---------|
| 615 | 2 | T2207c0gli1_1_A_T  | 5.0241  |
| 616 | 2 | T1298c3g4i2_1_A_T  | 5.1177  |
| 617 | 2 | T11986c3g4i1_1_A_T | 5.5958  |
| 618 | 2 | T12305c0gli3_1_A_T | 6.1643  |
| 619 | 2 | T4750c0gli1_1_A_T  | 6.4438  |
| 620 | 2 | T3614c0gli1_1_A_T  | 7.03    |
| 621 | 2 | T11753c0gli1_1_A_T | 7.3076  |
| 622 | 2 | T6331c0gli1_1_A_T  | 7.6097  |
| 623 | 2 | T751c0gli1_1_A_T   | 7.8253  |
| 624 | 2 | T10176c0gli1_1_A_T | 8.064   |
| 625 | 2 | T10034c0gli1_1_A_T | 8.4492  |
| 626 | 2 | T151c0gli1_1_A_T   | 8.8047  |
| 627 | 2 | T12297c4gli2_1_A_T | 9.2492  |
| 628 | 2 | T10173c0gli1_1_A_T | 9.3554  |
| 629 | 2 | T12223c8gli1_1_A_T | 9.7449  |
| 630 | 2 | T6947c0gli1_1_A_T  | 9.9277  |
| 631 | 2 | T13237c0gli1_1_A_T | 10.1911 |
| 632 | 2 | T3320c0gli1_1_A_T  | 10.6022 |
| 633 | 2 | T3775c1gli1_1_A_T  | 10.9044 |
| 634 | 2 | T247c0gli1_1_A_T   | 11.0691 |
| 635 | 2 | T1910c0gli1_1_A_T  | 11.5877 |
| 636 | 2 | T12020c0gli1_1_A_T | 11.9658 |
| 637 | 2 | T6540c0gli1_1_A_T  | 12.095  |
| 638 | 2 | T11595c0gli1_1_A_T | 12.6004 |
| 639 | 2 | T3692c2gli1_1_A_T  | 13.2392 |
| 640 | 2 | T10249c0gli1_1_A_T | 13.9407 |
| 641 | 2 | T13559c0gli1_1_A_T | 14.3782 |
| 642 | 2 | T397c0gli1_1_A_T   | 14.6575 |
| 643 | 2 | T9075c0gli1_1_A_T  | 15.2288 |
| 644 | 2 | T5750c0gli1_1_A_T  | 15.395  |
| 645 | 2 | T5449c0gli1_1_A_T  | 15.9532 |
| 646 | 2 | T310c0g2i1_1_A_T   | 16.5547 |
| 647 | 2 | T5331c0gli1_1_A_T  | 16.8303 |
| 648 | 2 | T7955c0gli1_1_A_T  | 17.1724 |
| 649 | 2 | T3000c0gli1_1_A_T  | 17.6693 |
| 650 | 2 | T4377c0gli1_1_A_T  | 18.0328 |
| 651 | 2 | T3217c0gli1_1_A_T  | 18.5191 |
| 652 | 2 | T1497c0gli1_1_A_T  | 18.7434 |
| 653 | 2 | T11957c3g5i1_1_A_T | 19.0872 |
| 654 | 2 | T7176c0gli1_1_A_T  | 19.4862 |
| 655 | 2 | T9483c3g2i1_1_A_T  | 19.7545 |
| 656 | 2 | T13192c4g2i1_1_A_T | 19.9496 |
| 657 | 2 | T9780c0gli1_1_A_T  | 20.5822 |
| 658 | 2 | T774c0gli1_1_A_T   | 20.9481 |



|     |   |                    |         |
|-----|---|--------------------|---------|
| 659 | 2 | T6758c0g2i1_1_A_T  | 21.3384 |
| 660 | 2 | T1298c3g3i1_1_A_T  | 21.5327 |
| 661 | 2 | T1791c0gli1_1_A_T  | 21.6398 |
| 662 | 2 | T10040c0gli1_1_A_T | 22.015  |
| 663 | 2 | T4228c0gli1_1_A_T  | 22.2891 |
| 664 | 2 | T13059c0gli1_1_A_T | 22.4262 |
| 665 | 2 | T2583c0g2i1_1_A_T  | 22.8072 |
| 666 | 2 | T3726c0g2i1_1_A_T  | 23.0675 |
| 667 | 2 | T10552c0gli1_1_A_T | 23.1539 |
| 668 | 2 | T7014c5g3i1_1_A_T  | 23.4693 |
| 669 | 2 | T6472c0gli1_1_A_T  | 23.7964 |
| 670 | 2 | T9348c0gli1_1_A_T  | 24.1338 |
| 671 | 2 | T7125c0gli1_1_A_T  | 24.3176 |
| 672 | 2 | T2461c0gli1_1_A_T  | 24.6197 |
| 673 | 2 | T12282c0gli1_1_A_T | 24.7636 |
| 674 | 2 | T735c0gli1_1_A_T   | 25.371  |
| 675 | 2 | T926c0gli1_1_A_T   | 25.8573 |
| 676 | 2 | T10570c0gli1_1_A_T | 26.1877 |
| 677 | 2 | T6700c0gli1_1_A_T  | 26.4385 |
| 678 | 2 | T10034c0g2i1_1_A_T | 26.8164 |
| 679 | 2 | T9138c0g3i1_1_A_T  | 27.0838 |
| 680 | 2 | T6447c0gli1_1_A_T  | 27.279  |
| 681 | 2 | T10282c0gli1_1_A_T | 27.609  |
| 682 | 2 | T10018c0gli1_1_A_T | 27.8984 |
| 683 | 2 | T11415c0gli1_1_A_T | 28.2021 |
| 684 | 2 | T9638c0gli1_1_A_T  | 28.4309 |
| 685 | 2 | T7231c0gli1_1_A_T  | 28.9071 |
| 686 | 2 | T8307c0gli1_1_A_T  | 29.1955 |
| 687 | 2 | T3938c0gli1_1_A_T  | 29.3211 |
| 688 | 2 | T10956c0gli1_1_A_T | 29.7749 |
| 689 | 2 | T11625c1g2i1_1_A_T | 30.0364 |
| 690 | 2 | T6474c0gli1_1_A_T  | 30.681  |
| 691 | 2 | T13168c0gli1_1_A_T | 31.0146 |
| 692 | 2 | T6787c0gli1_1_A_T  | 31.5144 |
| 693 | 2 | T7926c2g8i2_1_A_T  | 31.9782 |
| 694 | 2 | T262c0gli1_1_A_T   | 32.5034 |
| 695 | 2 | T3225c0gli1_1_A_T  | 32.7794 |
| 696 | 2 | T5562c0gli1_1_A_T  | 33.0172 |
| 697 | 2 | T2769c0gli1_1_A_T  | 33.3496 |
| 698 | 2 | T624c0g2i1_1_A_T   | 33.7157 |
| 699 | 2 | T11390c0gli1_1_A_T | 34.101  |
| 700 | 2 | T5844c0gli1_1_A_T  | 34.2723 |
| 701 | 2 | T597c0gli1_1_A_T   | 34.4097 |
| 702 | 2 | T13319c0gli1_1_A_T | 34.6692 |

|     |   |                    |         |
|-----|---|--------------------|---------|
| 703 | 2 | T10154c0gli1_1_A_T | 34.8621 |
| 704 | 2 | T12154c0gli1_1_A_T | 34.9636 |
| 705 | 2 | T10527c0gli1_1_A_T | 35.1513 |
| 706 | 2 | T3041c0gli1_1_A_T  | 35.3832 |
| 707 | 2 | T8237c0gli1_1_A_T  | 35.7194 |
| 708 | 2 | T3731c0gli1_1_A_T  | 36.0899 |
| 709 | 2 | T7373c0gli1_1_A_T  | 36.5236 |
| 710 | 2 | T10051c0g4i1_1_A_T | 36.6878 |
| 711 | 2 | T13149c0g4i1_1_A_T | 37.0501 |
| 712 | 2 | T10480c0gli1_1_A_T | 37.4711 |
| 713 | 2 | T9133c1gli1_1_A_T  | 37.6662 |
| 714 | 2 | T1799c0gli1_1_A_T  | 37.9061 |
| 715 | 2 | T6900c0gli1_1_A_T  | 38.144  |
| 716 | 2 | T10303c0gli1_1_A_T | 38.4833 |
| 717 | 2 | T13826c0gli1_1_A_T | 38.8599 |
| 718 | 2 | T12799c0gli3_1_A_T | 39.0782 |
| 719 | 2 | T11663c0gli1_1_A_T | 39.297  |
| 720 | 2 | T3511c0gli1_1_A_T  | 39.8065 |
| 721 | 2 | T8741c1gli1_1_A_T  | 40.2876 |
| 722 | 2 | T13182c2g6i1_1_A_T | 40.5062 |
| 723 | 2 | T5261c0g2i1_1_A_T  | 40.7589 |
| 724 | 2 | T5857c0gli1_1_A_T  | 41.099  |
| 725 | 2 | T7022c0g2i1_1_A_T  | 41.8398 |
| 726 | 2 | T5341c0gli1_1_A_T  | 41.959  |
| 727 | 2 | T651c0gli1_1_A_T   | 42.068  |
| 728 | 2 | T8793c0gli1_1_A_T  | 42.5127 |
| 729 | 2 | T7961c0gli1_1_A_T  | 42.6946 |
| 730 | 2 | T7506c0gli1_1_A_T  | 43.1223 |
| 731 | 2 | T5814c0gli1_1_A_T  | 43.5462 |
| 732 | 2 | T852c0gli1_25_A_T  | 43.8983 |
| 733 | 2 | T8692c3g2i1_1_A_T  | 44.2076 |
| 734 | 2 | T9364c0gli1_1_A_T  | 44.3297 |
| 735 | 2 | T9942c0gli1_1_A_T  | 44.9272 |
| 736 | 2 | T11524c0gli1_1_A_T | 45.2304 |
| 737 | 2 | T1366c0gli1_1_A_T  | 45.6766 |
| 738 | 2 | T9458c1gli1_1_A_T  | 46.2031 |
| 739 | 2 | T7137c0gli1_1_A_T  | 46.8261 |
| 740 | 2 | T13003c0gli1_1_A_T | 47.2529 |
| 741 | 2 | T831c0gli1_7_A_T   | 47.8238 |
| 742 | 2 | T10134c0gli1_1_A_T | 48.7186 |
| 743 | 2 | T784c0gli1_1_A_T   | 48.9706 |
| 744 | 2 | T6966c0gli1_1_A_T  | 49.5922 |
| 745 | 2 | T12234c5g2i2_19_A_ | 50.0358 |
| 746 | 2 | T6446c0gli1_1_A_T  | 50.4493 |

|     |   |                     |         |
|-----|---|---------------------|---------|
| 747 | 2 | T11221c0gli1_1_A_T  | 50.6493 |
| 748 | 2 | T10766c0gli1_1_A_T  | 50.7096 |
| 749 | 2 | T11497c0gli1_1_A_T  | 51.0015 |
| 750 | 2 | T9347c0gli1_1_A_T   | 51.4513 |
| 751 | 2 | T11201c0gli1_1_A_T  | 51.8321 |
| 752 | 2 | T12310c5g8i1_1_A_T  | 52.2617 |
| 753 | 2 | T11656c0gli1_1_A_T  | 52.5769 |
| 754 | 2 | T10834c0gli1_1_A_T  | 52.7506 |
| 755 | 2 | T8367c0gli1_26_A_T  | 53.152  |
| 756 | 2 | T1939c0gli1_22_A_T  | 53.8174 |
| 757 | 2 | T8130c0gli1_1_A_T   | 54.1792 |
| 758 | 2 | T1310c0g2i1_1_A_T   | 54.4073 |
| 759 | 2 | T1206c0gli1_1_A_T   | 54.7153 |
| 760 | 2 | T2399c0gli1_1_A_T   | 54.9799 |
| 761 | 2 | T9114c0gli1_1_A_T   | 55.5107 |
| 762 | 2 | T13832c0gli1_1_A_T  | 55.8417 |
| 763 | 2 | T10458c0gli1_1_A_T  | 56.1065 |
| 764 | 2 | T1792c0gli1_1_A_T   | 56.2051 |
| 765 | 2 | T6784c0gli1_1_A_T   | 56.4256 |
| 766 | 2 | T12339c0gli1_1_A_T  | 56.8878 |
| 767 | 2 | T7882c14g5i3_1_A_T  | 57.2289 |
| 768 | 2 | T9464c4g2i1_1_A_T   | 57.5317 |
| 769 | 2 | T12900c0gli1_1_A_T  | 57.7413 |
| 770 | 2 | T13019c0gli2_1_A_T  | 58.1327 |
| 771 | 2 | T12236c2g4i1_1_A_T  | 58.8414 |
| 772 | 2 | T5516c0gli1_1_A_T   | 59.3044 |
| 773 | 2 | T12661c0gli1_1_A_T  | 59.4208 |
| 774 | 2 | T13524c0gli1_1_A_T  | 59.6706 |
| 775 | 2 | T6254c0gli1_1_A_T   | 60.0613 |
| 776 | 2 | T1298c3gli1_1_A_T   | 60.5578 |
| 777 | 2 | T1142c0gli1_1_A_T   | 60.8676 |
| 778 | 2 | T13201c0gli1_1_A_T  | 61.2171 |
| 779 | 2 | T12902c0gli1_1_A_T  | 61.7856 |
| 780 | 2 | T5318c0gli1_1_A_T   | 62.0911 |
| 781 | 2 | T2407c0gli1_1_A_T   | 62.3688 |
| 782 | 2 | T10970c0gli1_1_A_T  | 62.6302 |
| 783 | 2 | T3156c0gli1_1_A_T   | 62.8037 |
| 784 | 2 | T10050c0gli1_1_A_T  | 63.0148 |
| 785 | 2 | T4838c0gli1_1_A_T   | 63.4556 |
| 786 | 2 | T7548c0gli1_1_A_T   | 63.9914 |
| 787 | 2 | T11451c0gli1_27_A_T | 64.5351 |
| 788 | 2 | T10281c2gli1_1_A_T  | 64.845  |
| 789 | 2 | T3031c0gli1_3_A_T   | 65.3528 |
| 790 | 2 | T7834c0gli1_1_A_T   | 65.7802 |

|     |   |                    |         |
|-----|---|--------------------|---------|
| 791 | 2 | T441c0gli1_22_A_T  | 66.1109 |
| 792 | 2 | T7923c0g2i3_1_A_T  | 66.5275 |
| 793 | 2 | T2767c0gli1_1_A_T  | 66.9331 |
| 794 | 2 | T6746c0g2i1_1_A_T  | 67.4317 |
| 795 | 2 | T5362c0gli1_1_A_T  | 67.7027 |
| 796 | 2 | T12889c0gli1_1_A_T | 67.978  |
| 797 | 2 | T382c1gli1_1_A_T   | 68.3225 |
| 798 | 2 | T148c0gli1_1_A_T   | 68.6196 |
| 799 | 2 | T13305c0gli1_4_A_T | 69.1635 |
| 800 | 2 | T6031c0gli1_26_A_T | 69.8808 |
| 801 | 2 | T7910c7g3i4_1_A_T  | 70.169  |
| 802 | 2 | T9479c3gli2_1_A_T  | 70.6865 |
| 803 | 2 | T4464c0gli1_27_A_T | 71.4527 |
| 804 | 2 | T54c0gli1_1_A_T    | 72.1391 |
| 805 | 2 | T9274c0gli1_29_A_T | 73.1953 |
| 806 | 2 | T7946c0g2i1_65_A_T | 74.4869 |
| 807 | 2 | T7907c9gli1_1_A_T  | 74.9494 |
| 808 | 2 | T8732c4g3i1_1_A_T  | 75.5942 |
| 809 | 2 | T3827c0gli1_1_A_T  | 75.9694 |
| 810 | 2 | T9798c0gli1_1_A_T  | 76.1381 |
| 811 | 2 | T3723c0gli1_4_A_T  | 76.4071 |
| 812 | 2 | T9450c6g3i1_1_A_T  | 76.608  |
| 813 | 2 | T10241c0gli1_1_A_T | 77.1479 |
| 814 | 2 | T12591c0gli4_1_A_T | 77.3533 |
| 815 | 2 | T7990c1gli1_1_A_T  | 77.5635 |
| 816 | 2 | T4480c0gli1_1_A_T  | 78.3595 |
| 817 | 2 | T3771c0gli1_1_A_T  | 78.582  |
| 818 | 2 | T4755c0gli1_122_A_ | 79.2604 |
| 819 | 2 | T1550c0gli1_1_A_T  | 80.1065 |
| 820 | 2 | T4429c0gli1_1_A_T  | 80.2391 |
| 821 | 2 | T663c0gli1_1_A_T   | 80.6468 |
| 822 | 2 | T10308c0g2i1_1_A_T | 80.8621 |
| 823 | 2 | T7913c3gli1_60_A_T | 81.1359 |
| 824 | 2 | T3258c0gli1_22_A_T | 81.7728 |
| 825 | 2 | T10639c0g2i1_19_A_ | 82.0942 |
| 826 | 2 | T8310c0gli1_1_A_T  | 82.1762 |
| 827 | 2 | T6561c0gli1_1_A_T  | 82.2816 |
| 828 | 2 | T7896c3g5i3_1_A_T  | 82.4553 |
| 829 | 2 | T1261c0gli1_1_A_T  | 82.8782 |
| 830 | 2 | T7421c0gli1_29_A_T | 83.5289 |
| 831 | 2 | T1903c0gli1_27_A_T | 84.4745 |
| 832 | 2 | T12234c5gli1_19_A_ | 85.3607 |
| 833 | 2 | T2770c0gli1_1_A_T  | 85.7473 |
| 834 | 2 | T9212c0gli1_1_A_T  | 86.4238 |

|     |   |                    |          |
|-----|---|--------------------|----------|
| 835 | 2 | T13334c0gli1_1_A_T | 86.6293  |
| 836 | 2 | T2142c0gli1_8_A_T  | 86.8787  |
| 837 | 2 | T7175c0gli1_1_A_T  | 87.3853  |
| 838 | 2 | T10122c0gli1_1_A_T | 87.7165  |
| 839 | 2 | T11483c0gli1_1_A_T | 88.0394  |
| 840 | 2 | T8622c0gli1_1_A_T  | 88.1759  |
| 841 | 2 | T12659c0gli1_1_A_T | 88.6024  |
| 842 | 2 | T1392c0gli1_1_A_T  | 88.9896  |
| 843 | 2 | T6600c0gli1_26_A_T | 89.6017  |
| 844 | 2 | T79c0gli1_46_A_T   | 90.1601  |
| 845 | 2 | T8029c0g3i1_49_A_T | 90.8146  |
| 846 | 2 | T9767c0g4i1_1_A_T  | 91.522   |
| 847 | 2 | T1672c0gli1_1_A_T  | 91.7773  |
| 848 | 2 | T9116c1gli1_1_A_T  | 92.0095  |
| 849 | 2 | T13514c0gli1_1_A_T | 92.5571  |
| 850 | 2 | T3773c0gli1_29_A_T | 92.9089  |
| 851 | 2 | T8716c0gli1_1_A_T  | 93.0951  |
| 852 | 2 | T12836c0gli1_1_A_T | 93.6673  |
| 853 | 2 | T2982c0gli1_22_A_T | 94.4813  |
| 854 | 2 | T3723c0gli2_4_A_T  | 95.012   |
| 855 | 2 | T11380c0gli1_26_A_ | 95.6911  |
| 856 | 2 | T11044c0gli1_22_A_ | 96.506   |
| 857 | 2 | T1144c0gli1_29_A_T | 97.2961  |
| 858 | 2 | T3170c0gli1_1_A_T  | 97.6983  |
| 859 | 2 | T8413c0gli1_1_A_T  | 97.9594  |
| 860 | 2 | T7977c0g2i1_27_A_T | 98.6654  |
| 861 | 2 | T9932c0gli1_1_A_T  | 99.1214  |
| 862 | 2 | T1844c0g2i1_1_A_T  | 99.3185  |
| 863 | 2 | T11997c7g3i1_1_A_T | 100.7682 |
| 864 | 2 | T7926c2g5i1_79_A_G | 103.6054 |
| 865 | 2 | T12234c4g5i2_4_T_C | 105.4229 |
| 866 | 2 | T10378c1gli2_324_G | 108.3531 |
| 867 | 2 | T8732c4g2i2_3_A_T  | 109.8144 |
| 868 | 2 | T7262c0gli1_4_T_C  | 111.6243 |
| 869 | 2 | T9479c3g4i1_5_T_C  | 112.7825 |
| 870 | 2 | T11925c4g3i1_3_A_T | 113.994  |
| 871 | 2 | T5508c0gli1_3_A_T  | 116.1407 |
| 872 | 2 | T11688c3g16i1_24_G | 117.7386 |
| 873 | 2 | T7905c21g5i1_1_T_A | 121.0303 |
| 874 | 3 | T11688c3g26i1_24_G | 0        |
| 875 | 3 | T4340c4gli1_345_AG | 1.6204   |
| 876 | 3 | T10378c1gli1_343_C | 2.7723   |
| 877 | 3 | T11871c0gli1_327_T | 4.4335   |
| 878 | 3 | T6477c0gli1_321_CT | 8.2047   |

|     |   |                    |         |
|-----|---|--------------------|---------|
| 879 | 3 | T13425c0gli1_87_GC | 10.8784 |
| 880 | 3 | T4721c0gli1_396_TG | 13.1742 |
| 881 | 3 | T5829c0gli1_404_GG | 14.5772 |
| 882 | 3 | T9487c0gli1_298_AA | 16.9358 |
| 883 | 3 | T2807c0gli1_1_AAAT | 18.2532 |
| 884 | 3 | T4377c0gli1_25_G_A | 19.8753 |
| 885 | 3 | T6645c0gli1_287_CG | 20.4413 |
| 886 | 3 | T10792c0g2i1_393_T | 21.1834 |
| 887 | 3 | T498c1gli1_66_AAAT | 22.0821 |
| 888 | 3 | T12941c0gli1_52_AA | 23.2563 |
| 889 | 3 | T12941c0gli1_51_AA | 24.2349 |
| 890 | 3 | T9131c4gli1_4_C_T  | 26.0832 |
| 891 | 3 | T11925c4g3i1_2_T_A | 27.0166 |
| 892 | 3 | T773c0gli1_7_AGAAA | 27.7641 |
| 893 | 3 | T10631c0g2i1_7_T_A | 28.8265 |
| 894 | 3 | T6481c0gli1_378_GG | 32.044  |
| 895 | 3 | T4746c4gli1_362_AG | 34.887  |
| 896 | 3 | T4746c4gli1_359_AG | 36.3044 |
| 897 | 3 | T2676c0gli1_6_CAGC | 39.154  |
| 898 | 3 | T8859c1gli1_619_CG | 41.2613 |
| 899 | 3 | T4720c0gli1_421_AT | 43.1576 |
| 900 | 3 | T11588c1g3i1_223_G | 44.6364 |
| 901 | 3 | T10205c0gli1_231_A | 46.0153 |
| 902 | 3 | T6296c0gli1_280_GA | 48.5478 |
| 903 | 3 | T7033c0gli2_3_ATTC | 51.7274 |
| 904 | 3 | T10378c1gli1_335_A | 56.6983 |
| 905 | 3 | T10378c1gli1_339_G | 60.599  |
| 906 | 3 | T10378c1gli1_341_A | 60.9207 |
| 907 | 3 | T11919c3g3i3_5_TCT | 62.196  |
| 908 | 3 | T11919c3g3i3_3_ATT | 62.4122 |
| 909 | 3 | T10378c1gli2_325_C | 64.0511 |
| 910 | 3 | T10378c1gli2_327_G | 65.2247 |
| 911 | 3 | T12327c0g2i1_259_C | 66.5624 |
| 912 | 3 | T7923c0g2i3_5_TCTG | 67.6626 |
| 913 | 3 | T7923c0g2i3_3_ATTC | 67.7588 |
| 914 | 3 | T5008c0gli1_3_ATTC | 69.0092 |
| 915 | 3 | T7882c14g7i1_2_AAT | 72.151  |
| 916 | 3 | T7846c1gli2_1_A_T  | 73.6916 |
| 917 | 3 | T9502c0gli1_1_A_T  | 75.6056 |
| 918 | 3 | T3282c0gli1_1_A_T  | 76.9526 |
| 919 | 3 | T7844c5g6i1_1_A_T  | 77.6872 |
| 920 | 3 | T10777c0gli1_1_A_T | 79.661  |
| 921 | 3 | T786c0gli1_1_A_T   | 80.418  |
| 922 | 3 | T9091c2gli1_1_A_T  | 82.0131 |

|     |   |                     |          |
|-----|---|---------------------|----------|
| 923 | 3 | T6496c0gli1_1_A_T   | 83.3463  |
| 924 | 3 | T9595c0g3i1_1_A_T   | 83.8975  |
| 925 | 3 | T10540c0gli1_1_A_T  | 84.408   |
| 926 | 3 | T9953c0g3i1_1_A_T   | 84.8651  |
| 927 | 3 | T9809c0g2i1_33_A_T  | 85.442   |
| 928 | 3 | T13182c2g9i1_1_A_T  | 86.1825  |
| 929 | 3 | T2519c0gli1_1_A_T   | 86.9267  |
| 930 | 3 | T1768c0gli1_1_A_T   | 87.4101  |
| 931 | 3 | T13382c0g2i1_1_A_T  | 87.6506  |
| 932 | 3 | T253c0gli1_1_A_T    | 88.5281  |
| 933 | 3 | T1120c0gli1_1_A_T   | 89.2388  |
| 934 | 3 | T6872c0gli1_28_A_T  | 89.4947  |
| 935 | 3 | T11373c0gli1_36_A_T | 90.1895  |
| 936 | 3 | T2265c0gli1_29_A_T  | 91.376   |
| 937 | 3 | T9221c0gli1_1_A_T   | 92.2858  |
| 938 | 3 | T6484c0gli1_1_A_T   | 92.7024  |
| 939 | 3 | T7886c1g8i1_1_A_T   | 93.0427  |
| 940 | 3 | T8121c0gli1_1_A_T   | 93.3728  |
| 941 | 3 | T10878c0gli1_1_A_T  | 93.6707  |
| 942 | 3 | T7492c0gli1_1_A_T   | 93.8137  |
| 943 | 3 | T13212c0g2i1_1_A_T  | 94.1897  |
| 944 | 3 | T25c0gli1_1_A_T     | 94.527   |
| 945 | 3 | T1024c0gli1_1_A_T   | 94.887   |
| 946 | 3 | T2556c0gli1_1_A_T   | 95.1349  |
| 947 | 3 | T11631c0gli1_1_A_T  | 95.4383  |
| 948 | 3 | T10563c0gli1_1_A_T  | 95.7301  |
| 949 | 3 | T5008c0gli1_1_A_T   | 96.0456  |
| 950 | 3 | T11035c0gli1_1_A_T  | 96.3753  |
| 951 | 3 | T1162c0gli1_1_A_T   | 96.8097  |
| 952 | 3 | T6333c0gli1_1_A_T   | 97.0663  |
| 953 | 3 | T2532c0gli1_1_A_T   | 97.2061  |
| 954 | 3 | T4708c0gli1_1_A_T   | 97.4527  |
| 955 | 3 | T8713c2g19i1_1_A_T  | 97.6168  |
| 956 | 3 | T7014c2g3i1_1_A_T   | 97.6861  |
| 957 | 3 | T2768c0gli1_1_A_T   | 97.965   |
| 958 | 3 | T5883c0gli1_1_A_T   | 98.2146  |
| 959 | 3 | T8628c0gli1_1_A_T   | 98.5889  |
| 960 | 3 | T11884c0gli1_1_A_T  | 98.8084  |
| 961 | 3 | T8744c5g3i2_1_A_T   | 99.3249  |
| 962 | 3 | T12683c0gli1_1_A_T  | 99.7237  |
| 963 | 3 | T8217c0gli1_1_A_T   | 100.0522 |
| 964 | 3 | T9805c0g5i1_1_A_T   | 100.4831 |
| 965 | 3 | T4776c0gli1_1_A_T   | 100.8328 |
| 966 | 3 | T11371c0gli1_1_A_T  | 101.1246 |

|      |   |                    |          |
|------|---|--------------------|----------|
| 967  | 3 | T2538c0gli1_1_A_T  | 101.3315 |
| 968  | 3 | T12958c0gli1_1_A_T | 101.8558 |
| 969  | 3 | T7014c2g2i1_1_A_T  | 102.2179 |
| 970  | 3 | T4708c0g2i1_1_A_T  | 102.5655 |
| 971  | 3 | T9965c0g4i1_1_A_T  | 102.6978 |
| 972  | 3 | T800c0gli1_1_A_T   | 102.7894 |
| 973  | 3 | T7014c5gli1_1_A_T  | 103.2185 |
| 974  | 3 | T11680c1gli1_1_A_T | 103.7563 |
| 975  | 3 | T12011c6g6i1_1_A_T | 103.9656 |
| 976  | 3 | T10046c0gli1_1_A_T | 104.3665 |
| 977  | 3 | T9826c2g2i1_1_A_T  | 104.4562 |
| 978  | 3 | T7835c0gli1_1_A_T  | 104.8173 |
| 979  | 3 | T8745c3gli5_1_A_T  | 105.0807 |
| 980  | 3 | T6656c0gli1_1_A_T  | 105.3139 |
| 981  | 3 | T1897c0gli1_1_A_T  | 105.5287 |
| 982  | 3 | T9826c2g18i1_1_A_T | 105.7979 |
| 983  | 3 | T1641c0gli1_1_A_T  | 106.0558 |
| 984  | 3 | T3297c0gli1_13_A_T | 106.8579 |
| 985  | 3 | T8044c0gli1_1_A_T  | 108.0097 |
| 986  | 3 | T2224c0gli1_1_A_T  | 108.2938 |
| 987  | 3 | T8869c0gli1_1_A_T  | 108.7916 |
| 988  | 3 | T9009c0gli1_1_A_T  | 109.2355 |
| 989  | 3 | T8084c0gli1_1_A_T  | 109.742  |
| 990  | 3 | T4156c0gli1_1_A_T  | 110.1402 |
| 991  | 3 | T4708c0gli2_1_A_T  | 110.2745 |
| 992  | 3 | T12897c0gli1_1_A_T | 110.4654 |
| 993  | 3 | T9506c0gli1_1_A_T  | 110.6454 |
| 994  | 3 | T9447c1gli3_1_A_T  | 110.8252 |
| 995  | 3 | T12261c0g5i1_1_A_T | 111.0707 |
| 996  | 3 | T5353c0gli1_1_A_T  | 111.507  |
| 997  | 3 | T4757c0gli1_1_A_T  | 112.118  |
| 998  | 3 | T2822c0gli1_1_A_T  | 112.6114 |
| 999  | 3 | T5360c0gli1_1_A_T  | 112.9019 |
| 1000 | 3 | T5451c0gli1_1_A_T  | 113.1674 |
| 1001 | 3 | T13719c0gli1_1_A_T | 113.562  |
| 1002 | 3 | T12896c0gli1_1_A_T | 113.6947 |
| 1003 | 3 | T9435c7gli1_1_A_T  | 114.0486 |
| 1004 | 3 | T7608c0gli1_1_A_T  | 114.2298 |
| 1005 | 3 | T5447c0gli1_1_A_T  | 114.328  |
| 1006 | 3 | T9696c0gli1_1_A_T  | 114.5226 |
| 1007 | 3 | T11629c7gli1_1_A_T | 114.7673 |
| 1008 | 3 | T457c0gli1_1_A_T   | 115.4351 |
| 1009 | 3 | T9965c0g3i1_1_A_T  | 115.9605 |
| 1010 | 3 | T11997c7g9i3_1_A_T | 116.287  |



|      |   |                    |          |
|------|---|--------------------|----------|
| 1011 | 3 | T9697c0gli1_1_A_T  | 116.3883 |
| 1012 | 3 | T4674c0gli1_1_A_T  | 116.7624 |
| 1013 | 3 | T6639c0gli1_1_A_T  | 117.0968 |
| 1014 | 3 | T11765c1gli1_1_A_T | 117.3211 |
| 1015 | 3 | T11680c1g3i1_1_A_T | 117.3987 |
| 1016 | 3 | T9946c2g4i1_1_A_T  | 117.5285 |
| 1017 | 3 | T11641c0gli1_1_A_T | 118.0481 |
| 1018 | 3 | T2152c0g3i1_1_A_T  | 118.7597 |
| 1019 | 3 | T2680c0gli1_1_A_T  | 119.1402 |
| 1020 | 3 | T5208c0gli1_1_A_T  | 119.4786 |
| 1021 | 3 | T3456c0gli1_1_A_T  | 119.8518 |
| 1022 | 3 | T1918c0gli1_1_A_T  | 120.0244 |
| 1023 | 3 | T7014c5g2i1_1_A_T  | 120.4001 |
| 1024 | 3 | T10441c0gli1_1_A_T | 120.5618 |
| 1025 | 3 | T6697c0gli1_1_A_T  | 120.6879 |
| 1026 | 3 | T1860c0gli1_1_A_T  | 120.9786 |
| 1027 | 3 | T7014c2g4i1_1_A_T  | 121.2524 |
| 1028 | 3 | T2574c0gli1_1_A_T  | 121.4709 |
| 1029 | 3 | T7186c0gli1_1_A_T  | 121.7382 |
| 1030 | 3 | T12294c8g6i12_1_A_ | 122.3123 |
| 1031 | 3 | T5324c0gli1_1_A_T  | 122.4986 |
| 1032 | 3 | T9826c2g15i1_1_A_T | 122.7195 |
| 1033 | 3 | T11958c0gli1_1_A_T | 123.0558 |
| 1034 | 3 | T10186c0gli1_1_A_T | 123.2099 |
| 1035 | 3 | T8708c2g2i1_1_A_T  | 123.5914 |
| 1036 | 3 | T10180c0gli1_1_A_T | 123.8983 |
| 1037 | 3 | T7291c0gli1_28_A_T | 124.4082 |
| 1038 | 3 | T11971c2g8i1_13_A_ | 125.1025 |
| 1039 | 3 | T9826c2g14i1_1_A_T | 125.8129 |
| 1040 | 3 | T1494c0gli2_1_A_T  | 126.2813 |
| 1041 | 3 | T4267c0gli1_1_A_T  | 126.4686 |
| 1042 | 3 | T7484c0gli1_1_A_T  | 126.8426 |
| 1043 | 3 | T6096c0gli1_1_A_T  | 127.1551 |
| 1044 | 3 | T13588c0gli1_1_A_T | 127.4786 |
| 1045 | 3 | T11214c0gli1_4_A_T | 127.8834 |
| 1046 | 3 | T6172c1gli1_1_A_T  | 128.3245 |
| 1047 | 3 | T8486c0gli1_1_A_T  | 128.6646 |
| 1048 | 3 | T13192c4gli2_1_A_T | 128.9581 |
| 1049 | 3 | T9948c0gli1_1_A_T  | 129.4502 |
| 1050 | 3 | T1484c0gli1_8_A_T  | 130.0363 |
| 1051 | 3 | T1800c0gli1_1_A_T  | 130.6147 |
| 1052 | 3 | T1480c0g3i1_1_A_T  | 131.0584 |
| 1053 | 3 | T11494c0gli1_1_A_T | 131.4807 |
| 1054 | 3 | T7087c0gli1_1_A_T  | 131.8336 |

|      |   |                    |          |
|------|---|--------------------|----------|
| 1055 | 3 | T1694c0gli1_1_A_T  | 132.0233 |
| 1056 | 3 | T7918c6gli1_1_A_T  | 132.3304 |
| 1057 | 3 | T9826c2g9i1_1_A_T  | 132.692  |
| 1058 | 3 | T5701c0gli1_1_A_T  | 133.0973 |
| 1059 | 3 | T11462c0gli1_1_A_T | 133.3625 |
| 1060 | 3 | T13477c0gli1_1_A_T | 133.74   |
| 1061 | 3 | T8995c0gli1_1_A_T  | 134.1356 |
| 1062 | 3 | T2765c0gli1_1_A_T  | 134.5495 |
| 1063 | 3 | T5480c0gli1_1_A_T  | 134.6175 |
| 1064 | 3 | T6649c0gli1_1_A_T  | 134.9821 |
| 1065 | 3 | T12011c5gli1_1_A_T | 135.2051 |
| 1066 | 3 | T2890c0gli1_1_A_T  | 135.5955 |
| 1067 | 3 | T227c0gli1_1_A_T   | 136.0131 |
| 1068 | 3 | T11248c0gli1_1_A_T | 136.3165 |
| 1069 | 3 | T3135c0gli1_1_A_T  | 136.4423 |
| 1070 | 3 | T4994c0gli1_3_A_T  | 136.7019 |
| 1071 | 3 | T2114c0gli1_1_A_T  | 136.9427 |
| 1072 | 3 | T10973c0gli1_1_A_T | 137.4184 |
| 1073 | 3 | T13233c0gli1_5_A_T | 138.0779 |
| 1074 | 3 | T12372c0gli1_27_A_ | 138.7581 |
| 1075 | 3 | T10987c0gli1_13_A_ | 139.263  |
| 1076 | 3 | T12222c0g3i1_28_A_ | 139.9655 |
| 1077 | 3 | T9403c0gli1_1_A_T  | 140.1808 |
| 1078 | 3 | T6611c0gli1_26_A_T | 140.8976 |
| 1079 | 3 | T13429c0gli1_1_A_T | 141.6914 |
| 1080 | 3 | T9569c0gli1_25_A_T | 142.4229 |
| 1081 | 3 | T6229c0gli1_28_A_T | 143.1991 |
| 1082 | 3 | T10141c0gli1_24_A_ | 144.0143 |
| 1083 | 3 | T3487c0gli1_50_A_T | 144.3947 |
| 1084 | 3 | T3304c0gli1_11_A_T | 145.0579 |
| 1085 | 3 | T8912c0gli1_1_A_T  | 145.3381 |
| 1086 | 3 | T11930c2gli1_1_A_T | 145.4534 |
| 1087 | 3 | T5280c0g2i1_1_A_T  | 145.8531 |
| 1088 | 3 | T12951c0gli1_33_A_ | 146.7992 |
| 1089 | 3 | T11329c0gli1_1_A_T | 147.7371 |
| 1090 | 3 | T2792c0gli1_1_A_T  | 147.8539 |
| 1091 | 3 | T9768c0gli1_1_A_T  | 148.2608 |
| 1092 | 3 | T1131c0gli1_1_A_T  | 148.549  |
| 1093 | 3 | T9719c0gli1_1_A_T  | 148.9811 |
| 1094 | 3 | T7165c0gli1_1_A_T  | 149.2037 |
| 1095 | 3 | T10052c0g2i1_1_A_T | 149.5391 |
| 1096 | 3 | T10869c0gli1_1_A_T | 149.9463 |
| 1097 | 3 | T10805c0gli1_1_A_T | 150.149  |
| 1098 | 3 | T9937c0gli1_1_A_T  | 150.6705 |

|      |   |                    |          |
|------|---|--------------------|----------|
| 1099 | 3 | T3253c0gli1_1_A_T  | 151.2387 |
| 1100 | 3 | T13213c4gli1_1_A_T | 151.6037 |
| 1101 | 3 | T8749c0g2i1_1_A_T  | 151.91   |
| 1102 | 3 | T13381c0gli1_1_A_T | 152.7378 |
| 1103 | 3 | T1946c0gli1_1_A_T  | 153.147  |
| 1104 | 3 | T2175c0gli1_1_A_T  | 153.4021 |
| 1105 | 3 | T5679c0gli1_1_A_T  | 153.6113 |
| 1106 | 3 | T4534c0gli1_1_A_T  | 154.2358 |
| 1107 | 3 | T7654c0gli1_1_A_T  | 154.522  |
| 1108 | 3 | T9490c3g5i1_1_A_T  | 154.9438 |
| 1109 | 3 | T160c0gli1_1_A_T   | 155.1499 |
| 1110 | 3 | T4071c0gli1_30_A_T | 155.8626 |
| 1111 | 3 | T11997c7gli2_114_A | 156.5142 |
| 1112 | 3 | T13692c0gli1_1_A_T | 157.0904 |
| 1113 | 3 | T7928c0gli1_1_A_T  | 157.6094 |
| 1114 | 3 | T4354c0gli1_1_A_T  | 157.9556 |
| 1115 | 3 | T8464c0gli1_1_A_T  | 158.2731 |
| 1116 | 3 | T560c0gli1_1_A_T   | 158.7551 |
| 1117 | 3 | T5106c0gli1_29_A_T | 158.9878 |
| 1118 | 3 | T6488c0gli1_1_A_T  | 159.4898 |
| 1119 | 3 | T766c0gli1_1_A_T   | 159.7435 |
| 1120 | 3 | T10122c0g2i1_1_A_T | 159.9598 |
| 1121 | 3 | T6853c0gli1_1_A_T  | 160.0727 |
| 1122 | 3 | T2875c0gli1_1_A_T  | 160.3927 |
| 1123 | 3 | T12771c0g3i1_1_A_T | 160.7589 |
| 1124 | 3 | T13739c0gli1_1_A_T | 161.1483 |
| 1125 | 3 | T12545c2gli1_1_A_T | 161.29   |
| 1126 | 3 | T8779c0gli1_1_A_T  | 161.6029 |
| 1127 | 3 | T3833c0gli1_1_A_T  | 161.7213 |
| 1128 | 3 | T12584c0gli1_1_A_T | 162.0616 |
| 1129 | 3 | T8777c0gli1_26_A_T | 162.3784 |
| 1130 | 3 | T11058c0gli1_1_A_T | 162.9018 |
| 1131 | 3 | T13182c2g4i1_1_A_T | 163.2342 |
| 1132 | 3 | T7948c2gli1_1_A_T  | 163.602  |
| 1133 | 3 | T9111c1g3i1_1_A_T  | 163.932  |
| 1134 | 3 | T11877c0gli1_1_A_T | 164.5355 |
| 1135 | 3 | T6576c0gli1_1_A_T  | 164.8898 |
| 1136 | 3 | T983c0gli1_1_A_T   | 165.1199 |
| 1137 | 3 | T5123c0gli1_1_A_T  | 165.3059 |
| 1138 | 3 | T12279c5g3i1_16_A  | 166.0408 |
| 1139 | 3 | T3965c0gli1_1_A_T  | 166.212  |
| 1140 | 3 | T9084c0gli1_1_A_T  | 166.5361 |
| 1141 | 3 | T12173c0gli1_1_A_T | 166.7641 |
| 1142 | 3 | T7641c0gli1_1_A_T  | 167.1696 |

|      |   |                    |          |
|------|---|--------------------|----------|
| 1143 | 3 | T2110c0gli1_1_A_T  | 167.6896 |
| 1144 | 3 | T12093c0gli1_3_A_T | 168.2892 |
| 1145 | 3 | T4661c1g2i1_1_A_T  | 168.6747 |
| 1146 | 3 | T8568c0g2i1_1_A_T  | 169.2221 |
| 1147 | 3 | T11714c0gli1_1_A_T | 169.5311 |
| 1148 | 3 | T2439c0gli1_1_A_T  | 169.9341 |
| 1149 | 3 | T10653c0gli1_1_A_T | 170.1626 |
| 1150 | 3 | T8119c0gli1_1_A_T  | 170.5361 |
| 1151 | 3 | T4532c0gli1_1_A_T  | 171.0304 |
| 1152 | 3 | T4345c0gli1_1_A_T  | 171.1145 |
| 1153 | 3 | T12272c1g2i1_1_A_T | 171.4729 |
| 1154 | 3 | T2175c0g2i1_1_A_T  | 171.9877 |
| 1155 | 3 | T11417c0gli1_1_A_T | 172.3268 |
| 1156 | 3 | T12282c0g2i1_1_A_T | 172.5865 |
| 1157 | 3 | T2256c0gli1_1_A_T  | 172.7187 |
| 1158 | 3 | T11883c0gli1_1_A_T | 173.0761 |
| 1159 | 3 | T4519c0gli1_32_A_T | 173.7442 |
| 1160 | 3 | T10436c0gli1_1_A_T | 174.1191 |
| 1161 | 3 | T4247c0gli1_1_A_T  | 174.3772 |
| 1162 | 3 | T6022c0gli1_1_A_T  | 174.6351 |
| 1163 | 3 | T8062c0gli1_1_A_T  | 174.908  |
| 1164 | 3 | T7895c1gli1_1_A_T  | 175.3463 |
| 1165 | 3 | T8710c0g3i1_1_A_T  | 175.7082 |
| 1166 | 3 | T10116c1gli1_19_A_ | 176.0295 |
| 1167 | 3 | T13191c5g5i1_11_A_ | 176.3256 |
| 1168 | 3 | T8132c0gli1_1_A_T  | 176.7961 |
| 1169 | 3 | T8014c0g2i1_1_A_T  | 176.9529 |
| 1170 | 3 | T11210c0gli1_1_A_T | 177.2606 |
| 1171 | 3 | T12221c1g4i1_1_A_T | 177.8211 |
| 1172 | 3 | T8557c0gli1_1_A_T  | 177.8891 |
| 1173 | 3 | T8492c0gli1_1_A_T  | 178.2923 |
| 1174 | 3 | T2647c0gli1_1_A_T  | 178.7208 |
| 1175 | 3 | T9802c0gli1_1_A_T  | 179.1811 |
| 1176 | 3 | T8861c0gli1_1_A_T  | 179.3997 |
| 1177 | 3 | T7896c3g4i1_1_A_T  | 179.6549 |
| 1178 | 3 | T12555c2gli1_1_A_T | 179.7455 |
| 1179 | 3 | T9868c0gli1_1_A_T  | 180.1058 |
| 1180 | 3 | T6734c0gli1_18_A_T | 180.5937 |
| 1181 | 3 | T2860c0gli1_27_A_T | 181.0638 |
| 1182 | 3 | T13563c0gli1_1_A_T | 181.4908 |
| 1183 | 3 | T10765c0gli1_3_A_T | 181.8059 |
| 1184 | 3 | T11690c0gli1_1_A_T | 182.307  |
| 1185 | 3 | T8155c0gli1_1_A_T  | 182.7719 |
| 1186 | 3 | T13096c0gli1_1_A_T | 183.1837 |

|      |   |                    |          |
|------|---|--------------------|----------|
| 1187 | 3 | T6168c0g2i1_1_A_T  | 183.4915 |
| 1188 | 3 | T1201c0gli1_1_A_T  | 183.8273 |
| 1189 | 3 | T11605c0g3i1_1_A_T | 184.266  |
| 1190 | 3 | T13149c0gli1_1_A_T | 184.5692 |
| 1191 | 3 | T4019c0gli1_2_A_T  | 184.7751 |
| 1192 | 3 | T1868c0gli1_1_A_T  | 184.9948 |
| 1193 | 3 | T12396c0gli1_1_A_T | 185.127  |
| 1194 | 3 | T8561c0g2i1_1_A_T  | 185.5772 |
| 1195 | 3 | T10885c0gli1_1_A_T | 186.0942 |
| 1196 | 3 | T13235c0gli1_29_A_ | 186.3171 |
| 1197 | 3 | T1629c0gli1_1_A_T  | 186.7472 |
| 1198 | 3 | T411c0gli1_1_A_T   | 187.1842 |
| 1199 | 3 | T3269c0gli1_1_A_T  | 187.5038 |
| 1200 | 3 | T7709c0gli1_1_A_T  | 187.6466 |
| 1201 | 3 | T6507c0gli1_1_A_T  | 187.94   |
| 1202 | 3 | T8882c0gli1_1_A_T  | 188.1807 |
| 1203 | 3 | T12596c0gli1_1_A_T | 188.636  |
| 1204 | 3 | T6918c0gli1_1_A_T  | 188.7765 |
| 1205 | 3 | T12915c0gli1_1_A_T | 189.1017 |
| 1206 | 3 | T10448c0g2i1_1_A_T | 189.2135 |
| 1207 | 3 | T12272c1g2i3_1_A_T | 189.7625 |
| 1208 | 3 | T7886c1g9i2_1_A_T  | 189.9734 |
| 1209 | 3 | T7961c0g4i1_1_A_T  | 190.1488 |
| 1210 | 3 | T7986c0gli1_1_A_T  | 190.5051 |
| 1211 | 3 | T8658c0gli1_1_A_T  | 190.9829 |
| 1212 | 3 | T5346c0gli1_1_A_T  | 191.5451 |
| 1213 | 3 | T2756c0gli1_257_TC | 194.7085 |
| 1214 | 3 | T2756c0gli1_255_TC | 195.2305 |
| 1215 | 3 | T2756c0gli1_238_AT | 197.1938 |
| 1216 | 4 | T7882c14gli2_4_TTC | 0        |
| 1217 | 4 | T7882c14gli2_3_ATT | 1.7212   |
| 1218 | 4 | T7882c14gli2_5_TCT | 2.3623   |
| 1219 | 4 | T12327c0g2i1_252_G | 4.4251   |
| 1220 | 4 | T7033c0gli2_5_TCTG | 6.2343   |
| 1221 | 4 | T11919c3g3i3_8_GCA | 8.1906   |
| 1222 | 4 | T12327c0g2i1_260_A | 9.8362   |
| 1223 | 4 | T4340c4gli1_337_GA | 11.3674  |
| 1224 | 4 | T9805c0g5i1_6_CA_C | 15.1512  |
| 1225 | 4 | T10578c0gli1_1_A_C | 18.2551  |
| 1226 | 4 | T11963c0g6i2_160_G | 21.1007  |
| 1227 | 4 | T11963c0g6i2_39_T_ | 21.8967  |
| 1228 | 4 | T11963c0g6i2_51_C_ | 22.2918  |
| 1229 | 4 | T11963c0g6i2_204_A | 23.0785  |
| 1230 | 4 | T11963c0g6i2_198_T | 23.5824  |

|      |   |                    |         |
|------|---|--------------------|---------|
| 1231 | 4 | T11855c0gli1_2_A_G | 24.7971 |
| 1232 | 4 | T6705c0gli1_2_A_G  | 25.3579 |
| 1233 | 4 | T10311c4gli1_2_A_G | 25.9471 |
| 1234 | 4 | T8845c1gli1_2_A_G  | 26.5958 |
| 1235 | 4 | T4731c0gli1_2_A_G  | 27.1847 |
| 1236 | 4 | T4731c0gli1_4_T_A  | 27.8033 |
| 1237 | 4 | T8845c1gli1_4_T_A  | 28.455  |
| 1238 | 4 | T11858c0gli1_2_A_G | 29.7173 |
| 1239 | 4 | T4156c0g2i1_2_A_G  | 30.2459 |
| 1240 | 4 | T11897c0gli1_2_A_G | 30.9868 |
| 1241 | 4 | T8852c0gli1_2_A_G  | 31.7812 |
| 1242 | 4 | T10185c0gli1_2_A_G | 32.5081 |
| 1243 | 4 | T11871c0gli1_325_T | 34.2889 |
| 1244 | 4 | T748c0gli1_281_TGA | 35.2943 |
| 1245 | 4 | T6717c0gli1_7_TGGC | 38.8686 |
| 1246 | 4 | T12941c0gli1_23_T_ | 41.8192 |
| 1247 | 4 | T2481c0g2i1_85_T_A | 43.6501 |
| 1248 | 4 | T11015c0gli2_7_CCG | 46.0471 |
| 1249 | 4 | T7033c0gli2_2_AATT | 48.3068 |
| 1250 | 4 | T11964c8gli1_1_T_A | 49.652  |
| 1251 | 4 | T7923c0g2i3_2_AATT | 50.7458 |
| 1252 | 4 | T9131c4gli1_2_T_A  | 53.126  |
| 1253 | 4 | T12234c4g5i2_2_T_A | 54.3703 |
| 1254 | 4 | T7029c4gli1_2_T_A  | 55.3188 |
| 1255 | 4 | T364c0gli1_182_G_G | 56.2907 |
| 1256 | 4 | T9131c4gli1_9_GC_G | 57.4708 |
| 1257 | 4 | T9131c4gli1_3_T_A  | 58.2156 |
| 1258 | 4 | T1145c0gli1_4_T_A  | 60.517  |
| 1259 | 4 | T1145c0gli1_3_T_A  | 62.9582 |
| 1260 | 4 | T11964c8gli1_3_T_A | 64.277  |
| 1261 | 4 | T11623c0gli3_3_T_A | 65.3029 |
| 1262 | 4 | T11688c3g40i1_3_T_ | 66.6725 |
| 1263 | 4 | T11688c3g8i1_3_T_A | 67.3316 |
| 1264 | 4 | T11688c3g26i1_3_T_ | 67.919  |
| 1265 | 4 | T11688c3g42i1_3_T_ | 68.2397 |
| 1266 | 4 | T11688c3g22i1_3_T_ | 68.6149 |
| 1267 | 4 | T11688c3g18i1_3_T_ | 68.9039 |
| 1268 | 4 | T11688c3g10i1_3_T_ | 69.714  |
| 1269 | 4 | T11688c3g33i1_3_T_ | 70.6469 |
| 1270 | 4 | T7262c0gli1_3_T_A  | 71.7912 |
| 1271 | 4 | T10311c4gli1_71_T_ | 73.9825 |
| 1272 | 4 | T10311c4gli1_72_G_ | 74.0628 |
| 1273 | 4 | T11925c4g3i1_4_C_A | 75.5312 |
| 1274 | 4 | T11963c0g6i2_132_T | 78.3874 |

|      |   |                     |          |
|------|---|---------------------|----------|
| 1275 | 4 | T9460c0gli1_278_TA  | 81.952   |
| 1276 | 4 | T9502c0gli1_309_AA  | 82.0588  |
| 1277 | 4 | T4742c0gli1_4_TTC_  | 82.1784  |
| 1278 | 4 | T11884c0gli1_7_GGT  | 82.3729  |
| 1279 | 4 | T786c0gli1_282_TAG  | 82.5738  |
| 1280 | 4 | T788c0gli1_223_GAA  | 82.7664  |
| 1281 | 4 | T4340c4gli1_347_AA  | 83.0391  |
| 1282 | 4 | T10378c1gli1_345_G  | 83.2709  |
| 1283 | 4 | T12327c0g2i1_261_G  | 83.6519  |
| 1284 | 4 | T4746c4gli1_360_GC  | 84.4619  |
| 1285 | 4 | T4746c4gli1_361_CA  | 84.585   |
| 1286 | 4 | T6460c0gli1_4_TTC_  | 85.1665  |
| 1287 | 4 | T6477c0gli1_323_TG  | 85.4324  |
| 1288 | 4 | T3692c2gli1_3_ATTCT | 85.5773  |
| 1289 | 4 | T4156c0g2i1_4_TTC_  | 85.5868  |
| 1290 | 4 | T6481c0gli1_379_GA  | 85.7541  |
| 1291 | 4 | T9502c0gli1_311_GA  | 85.9229  |
| 1292 | 4 | T7909c7g4i1_4_TTCT  | 87.752   |
| 1293 | 4 | T11775c0gli1_315_A  | 88.4456  |
| 1294 | 4 | T11863c0gli1_433_A  | 89.3677  |
| 1295 | 4 | T11688c3g36i1_4_TT  | 90.209   |
| 1296 | 4 | T6466c0gli1_310_GA  | 90.5957  |
| 1297 | 4 | T4751c0gli1_4_TTCA  | 92.26    |
| 1298 | 4 | T4720c0gli1_426_GA  | 93.9942  |
| 1299 | 4 | T10189c0gli1_311_G  | 95.2487  |
| 1300 | 4 | T6705c0gli1_4_TTC_  | 97.6678  |
| 1301 | 4 | T4728c0gli1_322_AA  | 99.6375  |
| 1302 | 4 | T4741c0gli1_302_GA  | 100.7421 |
| 1303 | 4 | T4756c1gli1_255_GA  | 101.5044 |
| 1304 | 4 | T4721c0gli1_397_GA  | 103.3975 |
| 1305 | 4 | T8859c1gli1_618_CC  | 104.5101 |
| 1306 | 4 | T11741c0gli1_4_TTC  | 106.5737 |
| 1307 | 4 | T4262c0gli1_224_AA  | 108.4787 |
| 1308 | 4 | T8859c1gli1_621_AA  | 110.2728 |
| 1309 | 4 | T5487c0gli1_231_AA  | 111.8247 |
| 1310 | 4 | T10164c0gli1_491_G  | 113.0277 |
| 1311 | 4 | T9502c0gli1_308_CA  | 114.189  |
| 1312 | 4 | T12300c14gli1_4_TT  | 114.8415 |
| 1313 | 4 | T4750c0gli1_4_TTCT  | 115.2376 |
| 1314 | 4 | T2798c0gli1_4_TTCG  | 115.4957 |
| 1315 | 4 | T4742c0gli1_5_TCCG  | 116.0968 |
| 1316 | 4 | T4727c0gli1_568_GA  | 116.5178 |
| 1317 | 4 | T8956c0gli1_337_AA  | 117.1238 |
| 1318 | 4 | T6485c0gli1_4_TTCG  | 117.9564 |

|      |   |                    |          |
|------|---|--------------------|----------|
| 1319 | 4 | T7909c7g4i2_4_TTC_ | 118.7461 |
| 1320 | 4 | T10161c1gli1_4_TT_ | 119.0692 |
| 1321 | 4 | T8868c0gli1_4_TTCT | 119.8647 |
| 1322 | 4 | T437c0gli1_399_AAT | 120.5407 |
| 1323 | 4 | T6474c0gli1_4_TTCA | 120.8775 |
| 1324 | 4 | T13111c0gli1_4_TTC | 121.0738 |
| 1325 | 4 | T10792c0g2i1_394_G | 121.3368 |
| 1326 | 4 | T4736c1gli1_246_GA | 121.6025 |
| 1327 | 4 | T6487c0gli1_352_GA | 122.1796 |
| 1328 | 4 | T11855c0gli1_4_TTC | 123.5197 |
| 1329 | 4 | T11871c0gli1_329_A | 124.8575 |
| 1330 | 4 | T6477c0gli1_325_AA | 127.048  |
| 1331 | 4 | T4262c0gli1_223_GA | 128.6843 |
| 1332 | 4 | T5452c0gli1_5_TCGT | 130.3188 |
| 1333 | 4 | T5438c0gli1_5_TCGT | 131.8007 |
| 1334 | 4 | T10200c0gli1_325_A | 132.7042 |
| 1335 | 4 | T4094c0gli1_322_GA | 134.4812 |
| 1336 | 4 | T437c0gli1_398_GAA | 135.8868 |
| 1337 | 4 | T11875c0gli1_280_A | 136.7181 |
| 1338 | 4 | T7118c0gli1_5_TCCC | 137.6652 |
| 1339 | 4 | T7406c0gli1_4_TT_T | 138.5778 |
| 1340 | 4 | T11900c0gli1_4_TTC | 139.1673 |
| 1341 | 4 | T11878c0gli1_307_A | 139.4276 |
| 1342 | 4 | T9598c0gli1_4_TT_T | 139.7087 |
| 1343 | 4 | T6512c0gli1_4_TTCA | 140.367  |
| 1344 | 4 | T6510c0gli1_4_TT_T | 141.884  |
| 1345 | 4 | T5829c0gli1_406_AA | 143.4239 |
| 1346 | 4 | T9502c0gli1_312_AA | 144.1257 |
| 1347 | 4 | T12922c1gli1_352_A | 145.301  |
| 1348 | 4 | T8743c12g2i1_377_G | 146.1776 |
| 1349 | 4 | T4718c0gli1_288_GA | 147.1578 |
| 1350 | 4 | T11491c0gli1_4_TTC | 147.6613 |
| 1351 | 4 | T12846c0gli1_450_A | 148.3931 |
| 1352 | 4 | T2817c0gli1_527_GA | 149.5976 |
| 1353 | 4 | T11897c0gli1_4_TTC | 150.7576 |
| 1354 | 4 | T8214c0gli1_295_GA | 151.6301 |
| 1355 | 4 | T6480c0gli1_4_TTCT | 152.767  |
| 1356 | 4 | T2755c0gli1_226_GA | 153.4193 |
| 1357 | 4 | T6697c0gli1_5_TCCC | 154.3364 |
| 1358 | 4 | T6494c0gli1_234_AC | 155.3539 |
| 1359 | 4 | T3939c0gli1_329_AA | 155.6203 |
| 1360 | 4 | T9460c0gli1_280_GA | 156.4852 |
| 1361 | 4 | T4156c0g2i1_5_TCCA | 157.3509 |
| 1362 | 4 | T11598c0gli1_447_G | 159.6257 |



|      |   |                    |          |
|------|---|--------------------|----------|
| 1363 | 4 | T11598c0gli1_452_G | 161.211  |
| 1364 | 4 | T11598c0gli1_431_A | 161.3136 |
| 1365 | 4 | T11598c0gli1_365_A | 161.419  |
| 1366 | 4 | T11598c0gli1_70_C_ | 161.7186 |
| 1367 | 4 | T7034c5gli1_87_T_C | 164.5586 |
| 1368 | 4 | T12529c0gli1_3_T_A | 168.3855 |
| 1369 | 4 | T9131c4gli1_8_AG_A | 170.2376 |
| 1370 | 4 | T2470c0gli1_268_TA | 170.8902 |
| 1371 | 4 | T7905c21g5i1_4_C_T | 173.6311 |
| 1372 | 4 | T9254c0gli1_68_A_T | 176.5241 |
| 1373 | 4 | T12234c5g2i1_19_A_ | 177.961  |
| 1374 | 4 | T11839c0gli1_47_A_ | 179.2942 |
| 1375 | 4 | T11949c4gli1_37_A_ | 180.4774 |
| 1376 | 4 | T10656c0gli1_13_A_ | 181.5556 |
| 1377 | 4 | T2127c0gli1_19_A_T | 182.4935 |
| 1378 | 4 | T7989c6g12i1_18_A_ | 183.4553 |
| 1379 | 4 | T9968c0gli1_27_A_T | 184.4292 |
| 1380 | 4 | T5697c0gli1_28_A_T | 185.4272 |
| 1381 | 4 | T12652c0gli2_54_A_ | 186.3512 |
| 1382 | 4 | T3891c0gli2_80_A_T | 186.9765 |
| 1383 | 4 | T12124c0gli1_21_A_ | 188.0045 |
| 1384 | 4 | T4016c0gli1_30_A_T | 188.9634 |
| 1385 | 4 | T4688c0g5i1_115_A_ | 189.7868 |
| 1386 | 4 | T4996c0gli1_35_A_T | 190.304  |
| 1387 | 4 | T9445c2gli1_9_A_T  | 191.1454 |
| 1388 | 4 | T12258c1gli1_69_A_ | 191.8464 |
| 1389 | 4 | T11949c3gli1_18_A_ | 192.5506 |
| 1390 | 4 | T11949c4g2i1_37_A_ | 193.6032 |
| 1391 | 4 | T10242c0g2i1_1_A_T | 194.389  |
| 1392 | 4 | T2819c0gli1_1_A_T  | 195.0096 |
| 1393 | 4 | T10211c0gli1_1_A_T | 195.6279 |
| 1394 | 4 | T576c0gli1_1_A_T   | 196.4049 |
| 1395 | 4 | T13096c0g2i1_1_A_T | 197.1009 |
| 1396 | 4 | T12234c5g3i1_19_A_ | 197.6028 |
| 1397 | 4 | T9105c1gli1_1_A_T  | 198.0737 |
| 1398 | 4 | T12236c2g2i1_1_A_T | 198.1956 |
| 1399 | 4 | T13165c1gli1_1_A_T | 198.344  |
| 1400 | 4 | T7911c0g5i1_1_A_T  | 198.8639 |
| 1401 | 4 | T9126c2gli2_1_A_T  | 199.4762 |
| 1402 | 4 | T7262c0gli1_1_A_T  | 199.8544 |
| 1403 | 4 | T13149c0g3i1_1_A_T | 200.1989 |
| 1404 | 4 | T9052c0gli1_1_A_T  | 200.6527 |
| 1405 | 4 | T1287c0gli1_1_A_T  | 200.7802 |
| 1406 | 4 | T5531c0gli1_1_A_T  | 200.9424 |

|      |   |                    |          |
|------|---|--------------------|----------|
| 1407 | 4 | T2737c0gli1_1_A_T  | 201.1505 |
| 1408 | 4 | T9796c0gli1_1_A_T  | 201.9844 |
| 1409 | 4 | T795c0g2i1_1_A_T   | 202.7864 |
| 1410 | 4 | T10781c0gli1_29_A_ | 203.6277 |
| 1411 | 4 | T7948c1gli3_1_A_T  | 204.6734 |
| 1412 | 4 | T3076c0gli1_1_A_T  | 205.2718 |
| 1413 | 4 | T6963c0gli1_1_A_T  | 205.3407 |
| 1414 | 4 | T9847c0g2i2_1_A_T  | 206.0902 |
| 1415 | 4 | T11037c0gli1_1_A_T | 206.5717 |
| 1416 | 4 | T3884c1gli1_1_A_T  | 207.0483 |
| 1417 | 4 | T972c0gli1_1_A_T   | 207.4129 |
| 1418 | 4 | T7919c4g3i1_1_A_T  | 207.8451 |
| 1419 | 4 | T1290c0gli1_1_A_T  | 208.1666 |
| 1420 | 4 | T2729c0gli1_1_A_T  | 208.2472 |
| 1421 | 4 | T3732c0gli1_1_A_T  | 208.4897 |
| 1422 | 4 | T12704c0gli1_1_A_T | 208.8558 |
| 1423 | 4 | T1030c0gli1_1_A_T  | 209.132  |
| 1424 | 4 | T2419c0gli1_1_A_T  | 209.5756 |
| 1425 | 4 | T3108c0gli1_1_A_T  | 209.8286 |
| 1426 | 4 | T11561c0gli1_1_A_T | 210.2312 |
| 1427 | 4 | T1298c3g4i1_1_A_T  | 210.5072 |
| 1428 | 4 | T9536c0gli1_1_A_T  | 210.8476 |
| 1429 | 4 | T7909c7g3i1_1_A_T  | 211.2234 |
| 1430 | 4 | T9760c0g2i1_122_A_ | 211.8504 |
| 1431 | 4 | T10916c0gli1_38_A_ | 212.4531 |
| 1432 | 4 | T4450c0gli1_1_A_T  | 213.0775 |
| 1433 | 4 | T8702c10gli2_1_A_T | 213.7318 |
| 1434 | 4 | T2724c0gli1_1_A_T  | 214.1706 |
| 1435 | 4 | T13270c0gli1_1_A_T | 214.5495 |
| 1436 | 4 | T11629c7g12i1_1_A_ | 215.0164 |
| 1437 | 4 | T8745c3gli4_1_A_T  | 215.3535 |
| 1438 | 4 | T12011c6g3i1_1_A_T | 215.6476 |
| 1439 | 4 | T7014c2g6i1_1_A_T  | 215.9655 |
| 1440 | 4 | T9100c0gli3_1_A_T  | 216.1621 |
| 1441 | 4 | T7918c6g3i1_1_A_T  | 216.6047 |
| 1442 | 4 | T4367c0gli1_1_A_T  | 216.8754 |
| 1443 | 4 | T1332c1gli2_1_A_T  | 217.0078 |
| 1444 | 4 | T379c0g2i1_1_A_T   | 217.1941 |
| 1445 | 4 | T998c0gli1_1_A_T   | 217.7293 |
| 1446 | 4 | T5860c0gli1_1_A_T  | 217.8368 |
| 1447 | 4 | T7950c0gli1_1_A_T  | 218.1877 |
| 1448 | 4 | T12294c8g8i1_1_A_T | 218.7399 |
| 1449 | 4 | T6187c0gli1_1_A_T  | 218.915  |
| 1450 | 4 | T3474c0gli1_1_A_T  | 219.0908 |

|      |   |                     |          |
|------|---|---------------------|----------|
| 1451 | 4 | T8267c0gli1_1_A_T   | 219.3537 |
| 1452 | 4 | T13252c0gli1_1_A_T  | 219.5911 |
| 1453 | 4 | T6708c0gli1_1_A_T   | 219.814  |
| 1454 | 4 | T12918c0gli1_1_A_T  | 220.4578 |
| 1455 | 4 | T9856c3g2i1_1_A_T   | 220.8547 |
| 1456 | 4 | T4745c0gli1_1_A_T   | 221.0961 |
| 1457 | 4 | T85c0gli1_1_A_T     | 221.3475 |
| 1458 | 4 | T9522c0gli1_1_A_T   | 221.4614 |
| 1459 | 4 | T13753c0gli1_1_A_T  | 221.6387 |
| 1460 | 4 | T5534c0gli1_1_A_T   | 222.0432 |
| 1461 | 4 | T7907c6g2i1_1_A_T   | 222.2089 |
| 1462 | 4 | T9826c2g1li1_1_A_T  | 222.3837 |
| 1463 | 4 | T10421c1gli1_1_A_T  | 222.7342 |
| 1464 | 4 | T13182c2g7i1_1_A_T  | 222.8742 |
| 1465 | 4 | T10184c0gli1_1_A_T  | 223.199  |
| 1466 | 4 | T12934c0gli1_1_A_T  | 223.4287 |
| 1467 | 4 | T2280c0gli1_1_A_T   | 223.7379 |
| 1468 | 4 | T9767c0g3i1_1_A_T   | 224.0178 |
| 1469 | 4 | T7014c2g8i1_1_A_T   | 224.3195 |
| 1470 | 4 | T4345c0g2i1_1_A_T   | 224.7484 |
| 1471 | 4 | T12234c4g6i1_1_A_T  | 225.1225 |
| 1472 | 4 | T11793c0gli1_1_A_T  | 225.3141 |
| 1473 | 4 | T86c0gli1_1_A_T     | 225.4476 |
| 1474 | 4 | T2311c0gli1_1_A_T   | 225.6138 |
| 1475 | 4 | T9441c0gli1_1_A_T   | 225.8947 |
| 1476 | 4 | T3627c0gli1_1_A_T   | 226.0291 |
| 1477 | 4 | T1940c0gli1_1_A_T   | 226.2978 |
| 1478 | 4 | T8243c0gli1_1_A_T   | 226.588  |
| 1479 | 4 | T6351c0gli1_1_A_T   | 227.0455 |
| 1480 | 4 | T9434c0gli1_1_A_T   | 227.3796 |
| 1481 | 4 | T6716c0gli1_1_A_T   | 227.6943 |
| 1482 | 4 | T12011c6g5i1_1_A_T  | 228.228  |
| 1483 | 4 | T11688c3g18i1_1_A_T | 229.0558 |
| 1484 | 4 | T10452c0g2i1_1_A_T  | 229.343  |
| 1485 | 4 | T11629c7g10i1_1_A_T | 229.5116 |
| 1486 | 4 | T5508c0gli1_1_A_T   | 229.7321 |
| 1487 | 4 | T4742c0gli1_1_A_T   | 230.232  |
| 1488 | 4 | T7909c7g4i1_1_A_T   | 230.7038 |
| 1489 | 4 | T6464c0gli1_1_A_T   | 231.2325 |
| 1490 | 4 | T2676c0gli1_1_A_T   | 231.7681 |
| 1491 | 4 | T2818c1gli1_1_A_T   | 232.4493 |
| 1492 | 4 | T6503c0gli1_1_A_T   | 232.9362 |
| 1493 | 4 | T2952c1g2i1_1_A_T   | 233.3527 |
| 1494 | 4 | T12279c5g2i1_16_A_T | 233.929  |

|      |   |                    |          |
|------|---|--------------------|----------|
| 1495 | 4 | T9932c0g3i1_1_A_T  | 234.4171 |
| 1496 | 4 | T11507c0g2i1_22_A_ | 235.1498 |
| 1497 | 4 | T10607c0gli1_21_A_ | 235.639  |
| 1498 | 4 | T10122c0g2i1_4_TTC | 235.7816 |
| 1499 | 4 | T12222c0g6i1_28_A_ | 236.4031 |
| 1500 | 4 | T7909c7g2i1_1_A_T  | 236.6948 |
| 1501 | 4 | T11858c0gli1_1_A_T | 237.693  |
| 1502 | 4 | T4156c0g2i1_1_A_T  | 238.1906 |
| 1503 | 4 | T6637c0gli1_1_A_T  | 238.9352 |
| 1504 | 4 | T10185c0gli1_1_A_T | 239.6645 |
| 1505 | 4 | T10311c4gli1_1_A_T | 240.3761 |
| 1506 | 4 | T11897c0gli1_1_A_T | 241.1336 |
| 1507 | 4 | T8845c1gli1_1_A_T  | 241.5751 |
| 1508 | 4 | T4731c0gli1_1_A_T  | 241.9318 |
| 1509 | 4 | T13570c0gli1_1_A_T | 242.3461 |
| 1510 | 4 | T6705c0gli1_1_A_T  | 242.7023 |
| 1511 | 4 | T6460c0gli1_1_A_T  | 243.2021 |
| 1512 | 4 | T11855c0gli1_1_A_T | 243.6473 |
| 1513 | 4 | T9473c0g4i1_1_A_T  | 244.4421 |
| 1514 | 4 | T5161c0gli1_1_A_T  | 245.5615 |
| 1515 | 4 | T10668c0gli1_1_A_T | 245.8495 |
| 1516 | 4 | T11688c3g36i1_1_A_ | 246.3614 |
| 1517 | 4 | T9946c2gli1_1_A_T  | 246.9876 |
| 1518 | 4 | T9826c2g5i1_1_A_T  | 247.363  |
| 1519 | 4 | T756c0gli1_1_A_T   | 247.5994 |
| 1520 | 4 | T12848c0gli1_1_A_T | 247.9548 |
| 1521 | 4 | T2707c0gli1_1_A_T  | 248.3109 |
| 1522 | 4 | T3810c0gli1_1_A_T  | 248.5854 |
| 1523 | 4 | T747c0gli1_1_A_T   | 248.9429 |
| 1524 | 4 | T9953c0g2i1_1_A_T  | 249.2129 |
| 1525 | 4 | T484c0gli1_1_A_T   | 249.4752 |
| 1526 | 4 | T12027c0g2i1_1_A_T | 249.8193 |
| 1527 | 4 | T8745c3gli2_1_A_T  | 250.0998 |
| 1528 | 4 | T8176c0gli1_1_A_T  | 250.3661 |
| 1529 | 4 | T988c0gli1_1_A_T   | 250.7158 |
| 1530 | 4 | T4428c0gli1_1_A_T  | 250.869  |
| 1531 | 4 | T8328c0gli1_1_A_T  | 251.1483 |
| 1532 | 4 | T11773c0gli1_1_A_T | 251.2475 |
| 1533 | 4 | T6852c0gli1_1_A_T  | 251.4542 |
| 1534 | 4 | T6984c0gli1_1_A_T  | 251.7847 |
| 1535 | 4 | T8710c0g2i2_1_A_T  | 251.8764 |
| 1536 | 4 | T1935c0gli1_1_A_T  | 252.2445 |
| 1537 | 4 | T10191c1gli1_1_A_T | 252.5536 |
| 1538 | 4 | T8171c0gli1_1_A_T  | 252.7003 |

|      |   |                    |          |
|------|---|--------------------|----------|
| 1539 | 4 | T7146c0gli1_1_A_T  | 252.8514 |
| 1540 | 4 | T4712c1gli1_1_A_T  | 253.1848 |
| 1541 | 4 | T10780c0gli1_1_A_T | 253.3827 |
| 1542 | 4 | T6480c0gli1_1_A_T  | 253.7412 |
| 1543 | 4 | T6013c0gli1_1_A_T  | 254.2934 |
| 1544 | 4 | T3613c1gli1_1_A_T  | 254.536  |
| 1545 | 4 | T10665c0gli1_1_A_T | 255.0393 |
| 1546 | 4 | T11997c7g5i1_1_A_T | 255.3685 |
| 1547 | 4 | T2152c0g4i1_1_A_T  | 255.6727 |
| 1548 | 4 | T614c0gli1_1_A_T   | 256.0153 |
| 1549 | 4 | T11209c0gli1_1_A_T | 256.345  |
| 1550 | 4 | T3046c0gli1_1_A_T  | 256.4541 |
| 1551 | 4 | T5622c0gli1_1_A_T  | 256.6492 |
| 1552 | 4 | T1963c0gli1_1_A_T  | 256.9028 |
| 1553 | 4 | T7036c5g2i2_1_A_T  | 257.1517 |
| 1554 | 4 | T2208c0gli1_1_A_T  | 257.5272 |
| 1555 | 4 | T3020c0gli1_1_A_T  | 257.7511 |
| 1556 | 4 | T2728c0gli1_1_A_T  | 258.2738 |
| 1557 | 4 | T11643c0gli1_1_A_T | 258.4128 |
| 1558 | 4 | T4368c0gli1_1_A_T  | 258.699  |
| 1559 | 4 | T9004c0gli1_1_A_T  | 259.1295 |
| 1560 | 4 | T7458c0gli1_1_A_T  | 259.4664 |
| 1561 | 4 | T59c0gli1_1_A_T    | 259.7975 |
| 1562 | 4 | T13800c0gli1_1_A_T | 260.03   |
| 1563 | 4 | T7907c6gli1_1_A_T  | 260.425  |
| 1564 | 4 | T8744c4g2i1_1_A_T  | 260.8534 |
| 1565 | 4 | T3102c0gli1_34_A_T | 261.3361 |
| 1566 | 4 | T3831c0gli1_1_A_T  | 261.8911 |
| 1567 | 4 | T5868c0gli1_26_A_T | 262.2363 |
| 1568 | 4 | T2535c0gli1_1_A_T  | 262.6393 |
| 1569 | 4 | T1075c0gli1_1_A_T  | 262.9463 |
| 1570 | 4 | T2988c0gli1_1_A_T  | 263.1104 |
| 1571 | 4 | T10229c0gli1_1_A_T | 263.3496 |
| 1572 | 4 | T10156c0gli1_1_A_T | 263.5867 |
| 1573 | 4 | T13189c0gli3_1_A_T | 264.1219 |
| 1574 | 4 | T7909c7g5i1_1_A_T  | 264.9239 |
| 1575 | 4 | T770c0gli1_1_A_T   | 265.8205 |
| 1576 | 4 | T8723c2g2i2_28_A_T | 266.4084 |
| 1577 | 4 | T4126c0gli1_1_A_T  | 267.0456 |
| 1578 | 4 | T2965c0gli1_1_A_T  | 267.6868 |
| 1579 | 4 | T7725c0gli1_1_A_T  | 268.169  |
| 1580 | 4 | T10112c0gli1_1_A_T | 268.3655 |
| 1581 | 4 | T12256c3gli1_1_A_T | 268.9367 |
| 1582 | 4 | T1756c0gli1_1_A_T  | 269.0959 |

|      |   |                    |          |
|------|---|--------------------|----------|
| 1583 | 4 | T3178c0gli1_27_A_T | 269.3232 |
| 1584 | 4 | T12133c0gli1_1_A_T | 269.4444 |
| 1585 | 4 | T6398c0gli1_1_A_T  | 269.8002 |
| 1586 | 4 | T9790c0g34i1_1_A_T | 270.2615 |
| 1587 | 4 | T2424c0gli1_1_A_T  | 270.5266 |
| 1588 | 4 | T8976c0gli1_1_A_T  | 270.7725 |
| 1589 | 4 | T13161c1g2i2_1_A_T | 271.1224 |
| 1590 | 4 | T2453c0gli1_1_A_T  | 271.2514 |
| 1591 | 4 | T822c0gli1_1_A_T   | 272.7185 |
| 1592 | 4 | T1822c0gli1_1_A_T  | 274.4955 |
| 1593 | 4 | T556c0gli1_1_A_T   | 275.971  |
| 1594 | 4 | T1568c0gli1_1_A_T  | 278.4585 |
| 1595 | 4 | T7882c14g7i1_5_TCT | 280.0943 |
| 1596 | 4 | T12252c6g2i1_87_A_ | 280.9423 |
| 1597 | 4 | T364c0gli1_186_T_A | 283.1332 |
| 1598 | 4 | T364c0gli1_183_G_A | 285.3355 |
| 1599 | 4 | T1145c0gli1_2_G_A, | 294.193  |
| 1600 | 5 | T10239c0gli1_126_T | 0        |
| 1601 | 5 | T6512c0gli1_153_CG | 4.659    |
| 1602 | 5 | T6512c0gli1_152_AC | 5.1993   |
| 1603 | 5 | T11737c0gli1_132_C | 9.9459   |
| 1604 | 5 | T6716c0gli1_248_A_ | 14.1216  |
| 1605 | 5 | T6716c0gli1_20_C_T | 14.7623  |
| 1606 | 5 | T6716c0gli1_264_C_ | 15.4643  |
| 1607 | 5 | T6716c0gli1_227_A_ | 15.571   |
| 1608 | 5 | T12912c0gli1_17_T_ | 17.7057  |
| 1609 | 5 | T7155c0gli1_16_T_A | 19.932   |
| 1610 | 5 | T5140c0gli1_17_T_A | 21.6188  |
| 1611 | 5 | T8217c0gli1_159_A_ | 23.9772  |
| 1612 | 5 | T8217c0gli1_156_C_ | 24.1536  |
| 1613 | 5 | T2952c1g2i1_67_AG_ | 27.246   |
| 1614 | 5 | T6462c1gli1_316_TG | 29.8311  |
| 1615 | 5 | T285c0gli1_292_T_C | 31.2559  |
| 1616 | 5 | T285c0gli1_291_G_T | 31.8562  |
| 1617 | 5 | T285c0gli1_290_G_T | 31.9272  |
| 1618 | 5 | T285c0gli1_283_T_G | 32.1176  |
| 1619 | 5 | T285c0gli1_288_G_T | 32.5895  |
| 1620 | 5 | T285c0gli1_293_G_A | 32.6568  |
| 1621 | 5 | T285c0gli1_277_T_A | 33.2597  |
| 1622 | 5 | T285c0gli1_276_T_C | 33.5575  |
| 1623 | 5 | T285c0gli1_274_G_C | 33.5902  |
| 1624 | 5 | T3689c0gli1_244_G_ | 35.6786  |
| 1625 | 5 | T10578c0gli1_109_T | 38.4325  |
| 1626 | 5 | T5464c0gli1_92_G_A | 43.1717  |

|      |   |                    |         |
|------|---|--------------------|---------|
| 1627 | 5 | T5464c0gli1_332_C_ | 45.1056 |
| 1628 | 5 | T7291c0gli1_90_A_G | 47.4428 |
| 1629 | 5 | T5447c0gli1_79_A_G | 48.3903 |
| 1630 | 5 | T9303c0gli1_258_A_ | 51.0562 |
| 1631 | 5 | T13086c0gli1_212_A | 52.3186 |
| 1632 | 5 | T1962c0gli1_346_C_ | 53.6501 |
| 1633 | 5 | T10264c1gli1_256_A | 55.1473 |
| 1634 | 5 | T11380c0gli1_44_T_ | 56.7503 |
| 1635 | 5 | T11380c0gli1_32_G_ | 56.78   |
| 1636 | 5 | T11380c0gli1_50_T_ | 56.8696 |
| 1637 | 5 | T11380c0gli1_180_C | 57.021  |
| 1638 | 5 | T4734c0gli1_291_C_ | 58.3983 |
| 1639 | 5 | T4428c0gli1_78_C_T | 58.7892 |
| 1640 | 5 | T11415c0gli1_99_C_ | 59.4235 |
| 1641 | 5 | T9680c0gli1_270_TT | 60.0924 |
| 1642 | 5 | T9680c0gli1_236_C_ | 60.47   |
| 1643 | 5 | T955c0gli1_315_A_C | 62.0306 |
| 1644 | 5 | T6099c0gli1_81_G_T | 63.8343 |
| 1645 | 5 | T6099c0gli1_83_G_C | 64.0973 |
| 1646 | 5 | T238c0gli1_204_T_C | 65.4281 |
| 1647 | 5 | T238c0gli1_241_T_C | 65.8793 |
| 1648 | 5 | T238c0gli1_94_A_G  | 66.2341 |
| 1649 | 5 | T238c0gli1_78_T_C  | 66.345  |
| 1650 | 5 | T238c0gli1_48_A_G  | 66.3728 |
| 1651 | 5 | T238c0gli1_19_T_C  | 66.5138 |
| 1652 | 5 | T13225c0gli1_226_A | 67.4586 |
| 1653 | 5 | T13225c0gli1_214_G | 67.5583 |
| 1654 | 5 | T6667c0gli1_131_T_ | 68.3884 |
| 1655 | 5 | T6099c0gli1_309_G_ | 69.0651 |
| 1656 | 5 | T6099c0gli1_317_T_ | 69.1618 |
| 1657 | 5 | T5694c0gli1_207_CT | 69.7722 |
| 1658 | 5 | T5694c0gli1_205_CT | 69.8008 |
| 1659 | 5 | T5694c0gli1_289_A_ | 69.9431 |
| 1660 | 5 | T10987c0gli1_43_T_ | 70.6468 |
| 1661 | 5 | T4723c0gli1_192_GA | 71.3639 |
| 1662 | 5 | T4723c0gli1_74_C_T | 71.4761 |
| 1663 | 5 | T4723c0gli1_187_T_ | 71.5594 |
| 1664 | 5 | T4723c0gli1_112_C_ | 71.6459 |
| 1665 | 5 | T4723c0gli1_31_G_A | 71.704  |
| 1666 | 5 | T11109c0gli1_15_C_ | 72.8211 |
| 1667 | 5 | T7231c0gli1_31_A_T | 73.8651 |
| 1668 | 5 | T7231c0gli1_106_T_ | 73.8655 |
| 1669 | 5 | T7231c0gli1_280_G_ | 73.9459 |
| 1670 | 5 | T4460c0gli1_152_A_ | 75.3485 |

|      |   |                    |          |
|------|---|--------------------|----------|
| 1671 | 5 | T4035c0gli1_354_G_ | 76.416   |
| 1672 | 5 | T9274c0gli1_173_C_ | 78.2491  |
| 1673 | 5 | T9274c0gli1_47_C_T | 78.9803  |
| 1674 | 5 | T9274c0gli1_127_A_ | 79.1861  |
| 1675 | 5 | T11214c0gli1_16_C_ | 80.7293  |
| 1676 | 5 | T11214c0gli1_79_A_ | 80.8257  |
| 1677 | 5 | T11768c0gli1_131_G | 81.6689  |
| 1678 | 5 | T12011c6g6i1_92_C_ | 83.3643  |
| 1679 | 5 | T1958c0g2i1_29_C_T | 85.3722  |
| 1680 | 5 | T11248c0gli1_38_A_ | 86.9022  |
| 1681 | 5 | T254c0gli1_58_A_G  | 89.0739  |
| 1682 | 5 | T254c0gli1_53_T_C  | 89.1027  |
| 1683 | 5 | T254c0gli1_184_C_T | 89.8958  |
| 1684 | 5 | T254c0gli1_197_A_T | 89.9248  |
| 1685 | 5 | T254c0gli1_176_T_A | 90.0423  |
| 1686 | 5 | T254c0gli1_218_T_C | 90.1882  |
| 1687 | 5 | T3327c1gli1_95_T_G | 90.967   |
| 1688 | 5 | T3927c1gli1_101_T_ | 92.3451  |
| 1689 | 5 | T7433c0gli1_29_A_C | 93.6089  |
| 1690 | 5 | T7433c0gli1_366_C_ | 94.0081  |
| 1691 | 5 | T7433c0gli1_357_A_ | 94.269   |
| 1692 | 5 | T614c0gli1_11_C_T  | 95.6642  |
| 1693 | 5 | T5895c0gli1_52_GTT | 96.4426  |
| 1694 | 5 | T5895c0gli1_56_G_T | 96.6563  |
| 1695 | 5 | T4465c0gli1_233_C_ | 97.3738  |
| 1696 | 5 | T12148c0gli1_6_A_G | 98.029   |
| 1697 | 5 | T12148c0gli1_16_C_ | 98.0578  |
| 1698 | 5 | T12148c0gli1_200_G | 98.2348  |
| 1699 | 5 | T5324c0gli1_34_G_A | 99.493   |
| 1700 | 5 | T6618c0gli1_313_CT | 100.1935 |
| 1701 | 5 | T10196c0gli1_226_T | 101.0238 |
| 1702 | 5 | T10196c0gli1_157_G | 101.2208 |
| 1703 | 5 | T2352c0gli1_223_C_ | 101.7976 |
| 1704 | 5 | T2352c0gli1_255_A_ | 102.0223 |
| 1705 | 5 | T2352c0gli1_207_G_ | 102.0503 |
| 1706 | 5 | T4841c0gli1_149_G_ | 103.8272 |
| 1707 | 5 | T10018c0gli1_45_A_ | 106.6464 |
| 1708 | 5 | T10018c0gli1_185_T | 107.2234 |
| 1709 | 5 | T10018c0gli1_155_A | 107.5599 |
| 1710 | 5 | T10018c0gli1_208_C | 108.0322 |
| 1711 | 5 | T10018c0gli1_65_G_ | 108.1805 |
| 1712 | 5 | T11737c0gli1_38_G_ | 110.1502 |
| 1713 | 5 | T11255c0gli1_145_T | 113.2612 |
| 1714 | 5 | T5008c0gli1_18_G_C | 114.4554 |



|      |   |                    |          |
|------|---|--------------------|----------|
| 1715 | 5 | T2997c0gli1_297_G_ | 116.5541 |
| 1716 | 5 | T2997c0gli1_60_T_C | 116.6622 |
| 1717 | 5 | T2997c0gli1_69_G_A | 116.6972 |
| 1718 | 5 | T3399c0gli2_14_A_C | 119.0193 |
| 1719 | 5 | T3399c0gli2_44_A_G | 121.1646 |
| 1720 | 5 | T3399c0gli2_154_A_ | 121.417  |
| 1721 | 5 | T3399c0gli2_102_G_ | 121.7316 |
| 1722 | 5 | T13228c0gli1_131_T | 126.0056 |
| 1723 | 5 | T4526c0gli1_143_C_ | 129.7832 |
| 1724 | 5 | T10381c0gli2_193_T | 135.8577 |
| 1725 | 5 | T10878c0gli1_105_A | 138.282  |
| 1726 | 5 | T10878c0gli1_195_T | 138.7055 |
| 1727 | 5 | T10018c0gli1_110_G | 141.4553 |
| 1728 | 5 | T4705c0gli1_133_G_ | 144.1156 |
| 1729 | 5 | T3945c0gli1_34_A_G | 147.6377 |
| 1730 | 5 | T7889c3gli1_83_G_A | 151.41   |
| 1731 | 5 | T1296c1g4i1_164_G_ | 154.1033 |
| 1732 | 5 | T7431c0gli1_36_A_T | 157.4489 |
| 1733 | 5 | T583c1gli1_34_G_A  | 159.3514 |
| 1734 | 5 | T7995c0gli1_206_C_ | 161.466  |
| 1735 | 5 | T549c0gli1_117_C_A | 163.2693 |
| 1736 | 5 | T549c0gli1_205_A_T | 163.8431 |
| 1737 | 5 | T1296c1g2i2_196_T_ | 165.9987 |
| 1738 | 5 | T1901c0gli1_173_CA | 167.6135 |
| 1739 | 5 | T1901c0gli1_185_AC | 167.7533 |
| 1740 | 5 | T1901c0gli1_174_AA | 168.0328 |
| 1741 | 5 | T13787c0gli1_210_G | 170.1855 |
| 1742 | 5 | T795c0g2i1_90_G_A  | 173.6697 |
| 1743 | 5 | T2824c0gli1_169_G_ | 177.4041 |
| 1744 | 5 | T2824c0gli1_130_A_ | 178.0092 |
| 1745 | 5 | T2824c0gli1_256_C_ | 178.5516 |
| 1746 | 5 | T2824c0gli1_211_G_ | 178.9261 |
| 1747 | 5 | T4150c0gli1_126_T_ | 181.2098 |
| 1748 | 5 | T2574c0gli1_201_C_ | 182.8741 |
| 1749 | 5 | T11373c1gli1_94_C_ | 185.6294 |
| 1750 | 5 | T8607c0gli1_176_C_ | 188.3623 |
| 1751 | 5 | T10216c0gli1_39_T_ | 191.6857 |
| 1752 | 5 | T11728c0gli1_1_A_T | 196.135  |
| 1753 | 5 | T4876c0gli1_344_TT | 201.1251 |
| 1754 | 5 | T4876c0gli1_23_A_G | 203.2718 |
| 1755 | 5 | T4876c0gli1_338_GT | 204.6796 |
| 1756 | 5 | T6967c0gli1_168_T_ | 208.2746 |
| 1757 | 5 | T9186c0gli1_274_T_ | 211.2741 |
| 1758 | 5 | T3661c0gli1_22_G_A | 213.5253 |

|      |   |                    |          |
|------|---|--------------------|----------|
| 1759 | 5 | T6467c0gli1_138_TA | 215.0322 |
| 1760 | 5 | T6467c0gli1_137_TT | 215.0778 |
| 1761 | 5 | T11998c3g2i1_274_T | 217.2231 |
| 1762 | 5 | T562c0gli1_200_G_A | 220.0789 |
| 1763 | 5 | T10600c0gli1_58_G_ | 223.6939 |
| 1764 | 5 | T40c0gli1_235_G_T  | 227.1702 |
| 1765 | 5 | T10239c0gli1_288_T | 230.7364 |
| 1766 | 5 | T10239c0gli1_152_G | 231.267  |
| 1767 | 5 | T1683c0gli1_146_T_ | 233.6746 |
| 1768 | 5 | T11497c0gli1_57_T_ | 236.3763 |
| 1769 | 5 | T11497c0gli1_35_A_ | 236.4124 |
| 1770 | 5 | T11497c0gli1_30_T_ | 236.4491 |
| 1771 | 5 | T12181c0gli1_349_A | 239.9277 |
| 1772 | 5 | T2342c0gli1_288_A_ | 243.3934 |
| 1773 | 5 | T9116c1gli1_152_C_ | 247.3154 |
| 1774 | 5 | T1176c0gli1_235_C_ | 248.4734 |
| 1775 | 5 | T5261c0g2i1_97_G_A | 249.8687 |
| 1776 | 5 | T8568c0g2i1_26_G_A | 251.1841 |
| 1777 | 5 | T13568c0gli1_293_T | 253.0405 |
| 1778 | 5 | T13568c0gli1_290_T | 253.0421 |
| 1779 | 5 | T742c0gli1_97_G_A  | 253.7744 |
| 1780 | 5 | T742c0gli1_55_G_C  | 253.834  |
| 1781 | 5 | T742c0gli1_41_A_G  | 253.8655 |
| 1782 | 5 | T9510c10gli1_113_C | 254.6809 |
| 1783 | 5 | T6001c0gli1_231_T_ | 256.3503 |
| 1784 | 5 | T7725c0gli1_165_T_ | 259.2403 |
| 1785 | 5 | T7725c0gli1_97_C_A | 259.5083 |
| 1786 | 5 | T7725c0gli1_185_A_ | 259.701  |
| 1787 | 5 | T238c0gli1_220_ATT | 263.9793 |
| 1788 | 5 | T238c0gli1_221_TT_ | 264.5939 |
| 1789 | 5 | T11497c0gli1_133_A | 267.7462 |
| 1790 | 5 | T2244c0gli1_170_C_ | 270.1218 |
| 1791 | 5 | T3959c0gli1_276_G_ | 271.47   |
| 1792 | 5 | T8787c0gli1_154_A_ | 272.738  |
| 1793 | 5 | T11372c0gli1_214_A | 273.895  |
| 1794 | 5 | T11372c0gli1_221_T | 274.2838 |
| 1795 | 5 | T13079c0gli1_378_T | 275.1827 |
| 1796 | 5 | T413c0gli1_29_CAGC | 276.1975 |
| 1797 | 5 | T413c0gli1_28_CCAG | 276.3047 |
| 1798 | 5 | T7337c0gli1_241_C_ | 277.6653 |
| 1799 | 5 | T7337c0gli1_242_T_ | 277.7505 |
| 1800 | 5 | T7337c0gli1_158_A_ | 278.5574 |
| 1801 | 5 | T8452c0gli1_565_C_ | 279.6795 |
| 1802 | 5 | T1264c0gli1_174_A_ | 280.8367 |

|      |   |                    |          |
|------|---|--------------------|----------|
| 1803 | 5 | T1264c0gli1_158_C_ | 281.1216 |
| 1804 | 5 | T1264c0gli1_159_CT | 281.136  |
| 1805 | 5 | T4170c0gli1_141_A_ | 282.9934 |
| 1806 | 5 | T4008c0gli1_112_G_ | 285.4917 |
| 1807 | 5 | T4956c0gli1_183_A_ | 287.685  |
| 1808 | 5 | T12804c0gli1_176_G | 291.1479 |
| 1809 | 5 | T5350c0gli1_188_AT | 294.8529 |
| 1810 | 5 | T5350c0gli1_192_TA | 295.226  |
| 1811 | 5 | T5350c0gli1_196_CT | 295.33   |
| 1812 | 6 | T10723c0gli1_69_A_ | 0        |
| 1813 | 6 | T2520c0gli1_205_A_ | 2.8094   |
| 1814 | 6 | T11001c0gli1_150_A | 5.4329   |
| 1815 | 6 | T6503c0gli1_242_G_ | 8.145    |
| 1816 | 6 | T6462c1gli1_319_TA | 9.6372   |
| 1817 | 6 | T6462c1gli1_317_GC | 10.5587  |
| 1818 | 6 | T6487c0gli1_188_AG | 12.492   |
| 1819 | 6 | T7565c0gli1_145_T_ | 14.7052  |
| 1820 | 6 | T7565c0gli1_144_G_ | 15.1583  |
| 1821 | 6 | T7565c0gli1_146_T_ | 15.4601  |
| 1822 | 6 | T7565c0gli1_147_G_ | 15.7687  |
| 1823 | 6 | T11508c0gli1_226_C | 18.347   |
| 1824 | 6 | T5304c0gli1_67_C_T | 19.3399  |
| 1825 | 6 | T11161c0gli1_240_G | 20.519   |
| 1826 | 6 | T8760c0g2i1_301_G_ | 21.4203  |
| 1827 | 6 | T5727c0gli1_235_T_ | 23.9562  |
| 1828 | 6 | T1342c1g4i1_229_G_ | 27.0822  |
| 1829 | 6 | T1342c1g4i1_308_G_ | 28.7835  |
| 1830 | 6 | T3202c0gli1_337_C_ | 29.9712  |
| 1831 | 6 | T4797c0gli1_288_A_ | 30.6831  |
| 1832 | 6 | T5798c0gli1_200_G_ | 32.4985  |
| 1833 | 6 | T6333c0gli1_98_C_G | 34.3369  |
| 1834 | 6 | T3148c0gli1_104_C_ | 35.6444  |
| 1835 | 6 | T13059c0gli1_177_A | 36.9946  |
| 1836 | 6 | T11314c0gli1_40_G_ | 38.5226  |
| 1837 | 6 | T5516c0gli1_167_A_ | 39.8806  |
| 1838 | 6 | T11042c0gli1_41_T_ | 41.3986  |
| 1839 | 6 | T6623c0gli1_65_GAT | 42.6229  |
| 1840 | 6 | T6623c0gli1_78_ATT | 42.9653  |
| 1841 | 6 | T2306c0gli1_220_A_ | 44.1266  |
| 1842 | 6 | T2306c0gli1_201_G_ | 44.6904  |
| 1843 | 6 | T5022c1gli1_182_C_ | 45.9645  |
| 1844 | 6 | T5562c0gli1_201_GA | 46.967   |
| 1845 | 6 | T3775c1gli1_211_T_ | 48.1625  |
| 1846 | 6 | T3775c1gli1_204_A_ | 48.5451  |

|      |   |                    |          |
|------|---|--------------------|----------|
| 1847 | 6 | T2603c0gli1_161_C_ | 49.8022  |
| 1848 | 6 | T5562c0gli1_12_C_T | 50.8492  |
| 1849 | 6 | T8442c0gli1_152_A_ | 51.9457  |
| 1850 | 6 | T5350c0gli1_191_CT | 53.1035  |
| 1851 | 6 | T5350c0gli1_193_AT | 53.2473  |
| 1852 | 6 | T8900c0g2i1_332_CA | 54.4392  |
| 1853 | 6 | T702c0gli1_277_G_A | 55.5489  |
| 1854 | 6 | T7639c0gli1_83_G_A | 56.5572  |
| 1855 | 6 | T4454c0gli1_264_G_ | 57.6233  |
| 1856 | 6 | T8162c0gli1_14_T_C | 58.8335  |
| 1857 | 6 | T8162c0gli1_42_C_T | 59.0389  |
| 1858 | 6 | T8162c0gli1_156_T_ | 59.3007  |
| 1859 | 6 | T8162c0gli1_100_T_ | 59.8901  |
| 1860 | 6 | T4998c0gli1_29_G_A | 61.1815  |
| 1861 | 6 | T10018c0gli1_61_C_ | 63.1657  |
| 1862 | 6 | T3794c0gli1_68_C_A | 65.5936  |
| 1863 | 6 | T5208c0gli1_142_A_ | 66.7124  |
| 1864 | 6 | T8145c0gli1_154_A_ | 69.4529  |
| 1865 | 6 | T2790c0gli1_176_C_ | 72.5316  |
| 1866 | 6 | T8474c0gli1_169_A_ | 76.0415  |
| 1867 | 6 | T816c0gli1_209_T_G | 77.892   |
| 1868 | 6 | T816c0gli1_169_T_C | 77.9211  |
| 1869 | 6 | T6996c1gli1_286_G_ | 79.3809  |
| 1870 | 6 | T7253c0gli1_500_T_ | 81.2741  |
| 1871 | 6 | T109c0g2i1_107_G_C | 83.1338  |
| 1872 | 6 | T3401c0gli2_332_A_ | 84.3466  |
| 1873 | 6 | T9518c0gli7_596_C_ | 85.7316  |
| 1874 | 6 | T5845c0gli1_36_G_A | 87.2774  |
| 1875 | 6 | T5845c0gli1_23_C_A | 87.3842  |
| 1876 | 6 | T5845c0gli1_42_G_A | 87.4643  |
| 1877 | 6 | T11972c4g5i1_266_C | 88.8516  |
| 1878 | 6 | T9423c0gli1_99_A_C | 89.735   |
| 1879 | 6 | T9482c0g6i1_228_C_ | 90.2672  |
| 1880 | 6 | T9587c1g2i1_102_A_ | 91.586   |
| 1881 | 6 | T9587c1g2i1_103_AC | 92.2871  |
| 1882 | 6 | T9587c1g2i1_100_C_ | 92.4244  |
| 1883 | 6 | T11700c0gli1_816_C | 93.0128  |
| 1884 | 6 | T10168c0gli1_335_T | 93.6772  |
| 1885 | 6 | T10371c0gli1_443_C | 94.4952  |
| 1886 | 6 | T2873c0gli1_174_T_ | 95.1452  |
| 1887 | 6 | T11700c0gli1_183_A | 95.9075  |
| 1888 | 6 | T5819c0gli1_291_T_ | 97.6763  |
| 1889 | 6 | T302c0gli1_240_ATC | 99.7086  |
| 1890 | 6 | T1458c0gli1_375_A_ | 100.6949 |

|      |   |                    |          |
|------|---|--------------------|----------|
| 1891 | 6 | T3719c0gli1_133_C_ | 101.3831 |
| 1892 | 6 | T2591c0gli1_241_T_ | 102.0237 |
| 1893 | 6 | T13064c0gli1_598_A | 102.709  |
| 1894 | 6 | T12294c0gli1_364_A | 103.7795 |
| 1895 | 6 | T6742c0gli1_69_A_G | 105.2732 |
| 1896 | 6 | T2712c0gli1_357_A_ | 106.4332 |
| 1897 | 6 | T3717c0gli1_284_CC | 107.3775 |
| 1898 | 6 | T2940c0g2i1_347_C_ | 108.7855 |
| 1899 | 6 | T4982c0gli1_190_T_ | 110.4658 |
| 1900 | 6 | T2694c0gli1_216_A_ | 111.6311 |
| 1901 | 6 | T11483c0gli1_190_G | 112.5258 |
| 1902 | 6 | T11588c1g5i1_33_T_ | 113.5612 |
| 1903 | 6 | T9540c0gli1_248_C_ | 114.2068 |
| 1904 | 6 | T7892c4g3i2_252_G_ | 114.9737 |
| 1905 | 6 | T6668c0gli1_37_G_A | 116.4671 |
| 1906 | 6 | T1090c0gli1_124_C_ | 118.3348 |
| 1907 | 6 | T2940c0g2i1_69_C_T | 121.1869 |
| 1908 | 6 | T2940c0g2i1_304_T_ | 121.8045 |
| 1909 | 6 | T2940c0g2i1_45_G_A | 122.4514 |
| 1910 | 6 | T2940c0g2i1_108_G_ | 122.4828 |
| 1911 | 6 | T13586c0gli1_7_G_C | 125.7159 |
| 1912 | 6 | T6417c0gli1_11_C_A | 128.4819 |
| 1913 | 6 | T12663c0gli1_196_C | 131.1701 |
| 1914 | 6 | T7337c0gli1_154_A_ | 134.2546 |
| 1915 | 6 | T7337c0gli1_152_T_ | 135.6957 |
| 1916 | 6 | T4944c0gli1_387_TT | 138.552  |
| 1917 | 6 | T3912c0gli1_180_A_ | 140.9417 |
| 1918 | 6 | T3912c0gli1_218_C_ | 141.9172 |
| 1919 | 6 | T3912c0gli1_237_G_ | 142.1595 |
| 1920 | 6 | T3912c0gli1_297_A_ | 143.2201 |
| 1921 | 7 | T12552c0g3i1_244_G | 0        |
| 1922 | 7 | T724c0gli1_187_C_G | 3.5123   |
| 1923 | 7 | T1296c1g2i2_362_C_ | 7.2044   |
| 1924 | 7 | T4178c0gli1_92_C_T | 9.6165   |
| 1925 | 7 | T13182c2g9i1_56_T_ | 11.8597  |
| 1926 | 7 | T1296c1g3i1_164_G_ | 15.0137  |
| 1927 | 7 | T1296c1gli1_196_T_ | 17.9251  |
| 1928 | 7 | T315c0gli2_167_A_C | 21.0707  |
| 1929 | 7 | T3717c0gli2_421_G_ | 22.2334  |
| 1930 | 7 | T3717c0gli2_259_T_ | 22.3627  |
| 1931 | 7 | T3717c0gli2_265_C_ | 22.4937  |
| 1932 | 7 | T6965c0g2i1_264_T_ | 23.4829  |
| 1933 | 7 | T6965c0g2i1_189_G_ | 24.3505  |
| 1934 | 7 | T11749c0gli1_269_A | 24.749   |

|      |   |                    |          |
|------|---|--------------------|----------|
| 1935 | 7 | T132c0gli1_512_CTA | 25.3902  |
| 1936 | 7 | T8560c0gli1_153_G_ | 26.2275  |
| 1937 | 7 | T13264c0gli1_341_A | 27.0761  |
| 1938 | 7 | T5469c0gli1_501_A_ | 27.7743  |
| 1939 | 7 | T8465c0gli1_255_T_ | 28.4309  |
| 1940 | 7 | T8465c0gli1_293_A_ | 29.1131  |
| 1941 | 7 | T527c0gli1_287_T_G | 29.8563  |
| 1942 | 7 | T5543c0gli2_227_A_ | 30.4885  |
| 1943 | 7 | T6462c1gli1_311_AT | 32.0358  |
| 1944 | 7 | T6462c1gli1_310_GA | 33.9071  |
| 1945 | 7 | T9137c0g3i1_11_C_G | 38.7746  |
| 1946 | 7 | T9137c0g3i1_12_C_T | 38.8068  |
| 1947 | 7 | T9137c0g3i1_5_GA_G | 40.1476  |
| 1948 | 7 | T8533c0gli1_253_T_ | 42.0316  |
| 1949 | 7 | T12554c0g2i1_398_G | 43.424   |
| 1950 | 7 | T3401c0gli2_594_C_ | 45.4329  |
| 1951 | 7 | T11715c0gli1_153_T | 47.3791  |
| 1952 | 7 | T178c0gli1_21_G_T  | 48.5391  |
| 1953 | 7 | T2520c0gli1_288_G_ | 49.5374  |
| 1954 | 7 | T8442c0gli1_144_G_ | 50.9224  |
| 1955 | 7 | T8442c0gli1_167_A_ | 51.7112  |
| 1956 | 7 | T8265c0gli1_67_T_C | 54.6495  |
| 1957 | 7 | T5423c0gli1_312_T_ | 57.7703  |
| 1958 | 7 | T10791c0gli1_375_T | 59.5941  |
| 1959 | 7 | T4182c0gli1_134_G_ | 62.2584  |
| 1960 | 7 | T13438c0gli1_212_G | 65.2833  |
| 1961 | 7 | T4822c0g2i1_228_G_ | 68.227   |
| 1962 | 7 | T1860c0gli1_176_A_ | 70.441   |
| 1963 | 7 | T1860c0gli1_34_A_G | 71.0517  |
| 1964 | 7 | T8352c0gli1_1_A_T  | 74.427   |
| 1965 | 7 | T640c0gli1_201_T_A | 79.4325  |
| 1966 | 7 | T9946c2g4i1_131_T_ | 83.652   |
| 1967 | 7 | T11634c0g3i1_119_A | 86.2904  |
| 1968 | 7 | T11954c0gli5_282_G | 88.6838  |
| 1969 | 7 | T6736c0g3i1_147_T_ | 93.053   |
| 1970 | 7 | T3752c0gli1_233_A_ | 97.8861  |
| 1971 | 7 | T10631c0gli1_518_G | 100.5336 |
| 1972 | 7 | T682c0g2i1_153_GAT | 103.5171 |
| 1973 | 7 | T7234c0gli2_295_T_ | 105.5307 |
| 1974 | 7 | T2068c0gli1_509_AT | 106.8215 |
| 1975 | 7 | T3950c0g2i1_223_AA | 108.2737 |
| 1976 | 7 | T12796c0gli1_377_C | 110.4771 |
| 1977 | 7 | T3935c0gli1_25_T_C | 113.5279 |
| 1978 | 7 | T4711c0gli2_76_C_A | 116.4527 |

|      |   |                    |          |
|------|---|--------------------|----------|
| 1979 | 7 | T183c0gli1_288_T_G | 118.6609 |
| 1980 | 7 | T183c0gli1_207_A_G | 122.1881 |
| 1981 | 7 | T13079c0gli1_292_A | 124.7175 |
| 1982 | 7 | T8469c0gli1_330_G_ | 127.3834 |
| 1983 | 7 | T6064c0gli1_52_TCC | 131.042  |
| 1984 | 7 | T5563c0g2i1_240_T_ | 134.1744 |
| 1985 | 7 | T5563c0g2i1_239_T_ | 134.2323 |
| 1986 | 7 | T7565c0gli1_142_GT | 135.6316 |
| 1987 | 7 | T10568c0gli1_17_A_ | 138.6007 |
| 1988 | 7 | T5304c0gli1_1_A_T  | 142.1218 |
| 1989 | 7 | T7644c0gli1_1_A_T  | 144.9921 |
| 1990 | 7 | T4711c0gli2_267_T_ | 148.8879 |
| 1991 | 7 | T8565c0gli1_34_GTC | 152.4929 |
| 1992 | 7 | T4347c0gli1_100_C_ | 155.6113 |
| 1993 | 7 | T10682c0gli1_149_G | 158.067  |
| 1994 | 7 | T8978c0gli1_150_C_ | 160.3447 |
| 1995 | 7 | T8978c0gli1_140_A_ | 160.6394 |
| 1996 | 7 | T8978c0gli1_201_A_ | 161.3323 |
| 1997 | 7 | T165c0gli1_334_C_T | 164.2625 |
| 1998 | 7 | T11454c0gli1_246_C | 167.4627 |
| 1999 | 7 | T8396c0gli1_170_C_ | 171.5387 |
| 2000 | 7 | T8396c0gli1_166_A_ | 171.6772 |
| 2001 | 7 | T8396c0gli1_102_G_ | 172.4197 |
| 2002 | 7 | T8396c0gli1_204_A_ | 172.9625 |
| 2003 | 7 | T1695c0g2i2_33_T_A | 176.6969 |
| 2004 | 7 | T1695c0g2i2_123_A_ | 177.3107 |
| 2005 | 7 | T39c0gli1_307_T_C  | 179.9084 |
| 2006 | 7 | T6345c0gli1_183_T_ | 182.5774 |
| 2007 | 7 | T6345c0gli1_159_A_ | 184.4886 |
| 2008 | 7 | T4624c0gli1_68_G_A | 186.3004 |
| 2009 | 7 | T6599c0gli1_127_A_ | 187.7668 |
| 2010 | 7 | T5035c0gli1_265_A_ | 189.2983 |
| 2011 | 7 | T5351c0gli1_123_T_ | 191.0906 |
| 2012 | 7 | T1824c0gli1_249_T_ | 195.0986 |
| 2013 | 8 | T1578c0gli1_209_G_ | 0        |
| 2014 | 8 | T6499c0gli1_45_C_A | 3.4009   |
| 2015 | 8 | T756c0gli1_162_C_T | 6.1212   |
| 2016 | 8 | T1536c1gli1_415_G_ | 8.3676   |
| 2017 | 8 | T6576c0gli1_275_GA | 11.9153  |
| 2018 | 8 | T10519c0gli1_58_T_ | 13.976   |
| 2019 | 8 | T1194c0gli1_42_A_T | 16.3296  |
| 2020 | 8 | T7513c0gli1_16_A_T | 18.702   |
| 2021 | 8 | T933c0gli1_121_T_C | 20.4705  |
| 2022 | 8 | T933c0gli1_124_G_A | 20.5855  |

|      |   |                    |         |
|------|---|--------------------|---------|
| 2023 | 8 | T640c0gli1_198_C_T | 21.4667 |
| 2024 | 8 | T8476c0gli1_273_CT | 22.2987 |
| 2025 | 8 | T9540c0gli1_8_T_C  | 22.9267 |
| 2026 | 8 | T2988c0gli1_88_A_G | 23.9321 |
| 2027 | 8 | T2988c0gli1_121_T_ | 24.3811 |
| 2028 | 8 | T13586c0g2i1_7_G_C | 26.1562 |
| 2029 | 8 | T13586c0g2i1_218_T | 28.442  |
| 2030 | 8 | T1316c0gli1_322_CG | 32.4981 |
| 2031 | 8 | T10655c0gli1_267_T | 34.3741 |
| 2032 | 8 | T3538c0gli1_263_G_ | 37.0593 |
| 2033 | 8 | T11764c0gli1_292_G | 38.2553 |
| 2034 | 8 | T6271c0gli1_159_G_ | 39.0919 |
| 2035 | 8 | T7608c0gli1_72_C_T | 40.34   |
| 2036 | 8 | T10218c0gli1_26_A_ | 41.5348 |
| 2037 | 8 | T12552c0g3i1_288_T | 42.6785 |
| 2038 | 8 | T972c0gli1_33_T_G  | 44.5426 |
| 2039 | 8 | T4830c0gli1_40_T_C | 46.7566 |
| 2040 | 8 | T11995c2g4i1_170_A | 48.9081 |
| 2041 | 8 | T2241c0gli1_203_C_ | 52.868  |
| 2042 | 8 | T2241c0gli1_349_A_ | 54.2181 |
| 2043 | 8 | T2241c0gli1_77_A_G | 55.4155 |
| 2044 | 8 | T3524c0gli1_88_CGG | 58.3987 |
| 2045 | 8 | T3524c0gli1_81_GCG | 58.5521 |
| 2046 | 8 | T3524c0gli1_100_T_ | 59.2855 |
| 2047 | 8 | T3524c0gli1_93_ACG | 59.8183 |
| 2048 | 8 | T6833c0gli1_286_GG | 62.5747 |
| 2049 | 8 | T6833c0gli1_284_TG | 62.6854 |
| 2050 | 8 | T239c0gli1_25_T_C  | 64.1038 |
| 2051 | 8 | T8626c0gli1_118_A_ | 65.6425 |
| 2052 | 8 | T5458c0gli1_91_A_T | 67.7918 |
| 2053 | 8 | T2840c0gli1_116_G_ | 69.6418 |
| 2054 | 8 | T2840c0gli1_232_G_ | 70.341  |
| 2055 | 8 | T5279c0g2i1_195_C_ | 71.2826 |
| 2056 | 8 | T8752c8g4i1_41_C_T | 72.5318 |
| 2057 | 8 | T3014c0gli1_73_T_C | 74.0046 |
| 2058 | 8 | T6001c0gli1_51_T_A | 75.0803 |
| 2059 | 8 | T12139c0gli1_132_T | 76.1826 |
| 2060 | 8 | T12139c0gli1_22_T_ | 76.1935 |
| 2061 | 8 | T7782c0gli1_145_C_ | 76.9668 |
| 2062 | 8 | T7782c0gli1_50_A_T | 77.8332 |
| 2063 | 8 | T7782c0gli1_84_T_C | 79.5747 |
| 2064 | 8 | T7782c0gli1_133_T_ | 79.7531 |
| 2065 | 8 | T13236c0gli1_137_T | 82.1012 |
| 2066 | 8 | T10297c0gli1_402_C | 83.6319 |



|      |   |                    |          |
|------|---|--------------------|----------|
| 2067 | 8 | T9319c0gli1_54_G_A | 85.6506  |
| 2068 | 8 | T9319c0g2i1_54_G_A | 87.6896  |
| 2069 | 8 | T2781c0gli1_175_C_ | 89.5855  |
| 2070 | 8 | T7952c1gli4_226_CT | 90.6139  |
| 2071 | 8 | T1914c0gli1_188_C_ | 91.8656  |
| 2072 | 8 | T2107c0gli1_91_A_G | 92.4805  |
| 2073 | 8 | T2107c0gli1_38_G_T | 92.6927  |
| 2074 | 8 | T12011c5gli1_16_G_ | 93.6657  |
| 2075 | 8 | T3879c0gli1_196_C_ | 94.7549  |
| 2076 | 8 | T10916c0gli1_130_A | 96.2019  |
| 2077 | 8 | T10973c0gli1_322_T | 98.1424  |
| 2078 | 8 | T10973c0gli1_320_A | 98.1432  |
| 2079 | 8 | T10973c0gli1_321_G | 98.1821  |
| 2080 | 8 | T6787c0gli1_34_A_G | 100.1786 |
| 2081 | 8 | T5431c0gli1_38_G_A | 102.6183 |
| 2082 | 8 | T6031c0gli1_108_T_ | 104.3777 |
| 2083 | 8 | T13082c0gli1_144_G | 105.9631 |
| 2084 | 8 | T4572c0gli1_101_A_ | 107.5036 |
| 2085 | 8 | T4572c0gli1_366_T_ | 108.4185 |
| 2086 | 8 | T12124c0gli1_141_T | 109.7533 |
| 2087 | 8 | T12124c0gli1_74_A_ | 110.411  |
| 2088 | 8 | T1341c0gli1_229_G_ | 111.1964 |
| 2089 | 8 | T10692c0gli1_23_A_ | 112.5319 |
| 2090 | 8 | T10692c0gli1_156_C | 113.3516 |
| 2091 | 8 | T10692c0gli1_76_GG | 113.5329 |
| 2092 | 8 | T10692c0gli1_94_AG | 113.9916 |
| 2093 | 8 | T9299c0gli1_188_G_ | 115.0196 |
| 2094 | 8 | T12648c0gli1_285_C | 116.4455 |
| 2095 | 8 | T7141c1gli1_186_C_ | 117.4428 |
| 2096 | 8 | T13175c1g7i1_252_C | 118.2093 |
| 2097 | 8 | T12829c0gli1_267_G | 119.0517 |
| 2098 | 8 | T12829c0gli1_77_G_ | 119.7162 |
| 2099 | 8 | T4587c0gli1_263_C_ | 121.2185 |
| 2100 | 8 | T2714c0gli1_96_A_C | 122.8163 |
| 2101 | 8 | T2461c0gli1_134_A_ | 124.0312 |
| 2102 | 8 | T5476c0gli1_52_A_T | 125.8379 |
| 2103 | 8 | T10090c0gli1_159_A | 128.5157 |
| 2104 | 8 | T10090c0gli1_168_A | 129.2533 |
| 2105 | 8 | T10090c0gli1_99_A_ | 129.6907 |
| 2106 | 8 | T10090c0gli1_75_A_ | 129.7288 |
| 2107 | 8 | T8525c0gli1_44_C_T | 131.5357 |
| 2108 | 8 | T8525c0gli1_107_G_ | 132.1108 |
| 2109 | 8 | T8525c0gli1_142_T_ | 133.5577 |
| 2110 | 8 | T11866c0gli1_291_A | 135.0082 |

|      |   |                    |          |
|------|---|--------------------|----------|
| 2111 | 8 | T11866c0gli1_288_A | 135.7962 |
| 2112 | 8 | T11866c0gli1_292_G | 136.0303 |
| 2113 | 8 | T12595c0gli1_67_C_ | 137.7454 |
| 2114 | 8 | T4956c0gli1_144_T_ | 139.6727 |
| 2115 | 8 | T5527c0g2i1_114_GG | 141.2933 |
| 2116 | 8 | T1548c0gli1_182_A_ | 143.1092 |
| 2117 | 8 | T8735c3g6i3_105_C_ | 144.6849 |
| 2118 | 8 | T4303c0gli1_194_C_ | 145.671  |
| 2119 | 8 | T13205c3gli3_28_A_ | 146.5946 |
| 2120 | 8 | T5152c0gli1_126_AT | 147.4887 |
| 2121 | 8 | T12745c0gli2_51_T_ | 148.153  |
| 2122 | 8 | T10090c0gli1_165_A | 149.0679 |
| 2123 | 8 | T7511c0gli1_233_G_ | 150.3786 |
| 2124 | 8 | T4417c0gli1_102_G_ | 151.8892 |
| 2125 | 8 | T433c0gli1_22_T_C  | 153.4243 |
| 2126 | 8 | T4451c0gli1_56_T_C | 155.7407 |
| 2127 | 8 | T12892c0gli1_158_C | 157.1865 |
| 2128 | 8 | T8266c0gli1_325_T_ | 158.7168 |
| 2129 | 8 | T8396c0gli1_223_T_ | 160.2158 |
| 2130 | 8 | T8396c0gli1_193_C_ | 161.2809 |
| 2131 | 8 | T2241c0gli1_304_G_ | 163.1345 |
| 2132 | 8 | T2241c0gli1_145_G_ | 163.5974 |
| 2133 | 8 | T85c0gli1_88_C_T   | 165.2553 |
| 2134 | 8 | T10896c0gli1_126_T | 166.7869 |
| 2135 | 8 | T1459c0g4i1_47_TAA | 168.0942 |
| 2136 | 8 | T7087c0gli1_126_G_ | 169.2467 |
| 2137 | 8 | T6570c0gli1_85_C_T | 170.4308 |
| 2138 | 8 | T5357c0gli1_101_A_ | 171.6725 |
| 2139 | 8 | T5357c0gli1_134_A_ | 172.0184 |
| 2140 | 8 | T6863c0gli1_207_G_ | 173.5005 |
| 2141 | 8 | T6863c0gli1_236_G_ | 174.3788 |
| 2142 | 8 | T9477c2gli2_95_A_G | 175.5043 |
| 2143 | 8 | T3108c0gli1_152_C_ | 176.3254 |
| 2144 | 8 | T13167c0gli2_252_C | 177.0343 |
| 2145 | 8 | T13167c0gli2_223_G | 177.1138 |
| 2146 | 8 | T11311c1gli1_94_C_ | 178.9123 |
| 2147 | 8 | T13832c0gli1_124_A | 180.4508 |
| 2148 | 8 | T8581c0gli1_91_GAA | 181.8922 |
| 2149 | 8 | T4178c0gli1_307_G_ | 183.5854 |
| 2150 | 8 | T12255c1gli1_207_G | 185.3823 |
| 2151 | 8 | T5970c0g2i1_249_G_ | 187.0839 |
| 2152 | 8 | T13211c0g3i1_69_G_ | 187.8308 |
| 2153 | 8 | T12245c1g2i1_73_C_ | 188.862  |
| 2154 | 8 | T11657c0g3i2_78_C_ | 189.7911 |

|      |   |                    |          |
|------|---|--------------------|----------|
| 2155 | 8 | T4508c0g2i1_90_T_A | 191.0132 |
| 2156 | 8 | T520c0gli1_124_T_G | 192.1829 |
| 2157 | 8 | T11954c0gli5_64_T_ | 193.1317 |
| 2158 | 8 | T10998c0gli1_129_G | 194.3704 |
| 2159 | 8 | T13191c5gli1_168_G | 195.6536 |
| 2160 | 8 | T8777c0gli1_129_CT | 197.1279 |
| 2161 | 8 | T1237c0gli1_138_G_ | 198.305  |
| 2162 | 8 | T12273c0g2i1_197_G | 199.2443 |
| 2163 | 8 | T8328c0gli1_232_G_ | 200.5298 |
| 2164 | 8 | T12676c0gli1_108_C | 201.7561 |
| 2165 | 8 | T13657c0gli1_145_C | 202.5392 |
| 2166 | 8 | T1494c0gli1_38_C_T | 203.8482 |
| 2167 | 8 | T1672c0gli1_130_C_ | 204.9994 |
| 2168 | 8 | T3914c0gli1_171_G_ | 205.8921 |
| 2169 | 8 | T3914c0gli1_183_C_ | 206.2189 |
| 2170 | 8 | T3914c0gli1_56_T_C | 206.8811 |
| 2171 | 8 | T3914c0gli1_128_G_ | 207.0891 |
| 2172 | 8 | T3914c0gli1_26_A_T | 207.2974 |
| 2173 | 8 | T12242c6g10i1_176_ | 208.8497 |
| 2174 | 8 | T12242c6g10i1_163_ | 209.1323 |
| 2175 | 8 | T4073c0gli1_115_C_ | 210.8514 |
| 2176 | 8 | T12240c0g3i5_265_G | 212.2841 |
| 2177 | 8 | T9028c0gli1_52_C_T | 213.313  |
| 2178 | 8 | T995c0gli1_129_G_A | 214.4097 |
| 2179 | 8 | T995c0gli1_179_G_A | 214.4134 |
| 2180 | 8 | T995c0gli1_228_G_A | 214.5041 |
| 2181 | 8 | T995c0gli1_207_T_C | 214.8351 |
| 2182 | 8 | T995c0gli1_183_T_C | 214.9749 |
| 2183 | 8 | T9592c0gli1_62_A_G | 216.4231 |
| 2184 | 8 | T11979c0g4i1_200_T | 217.8761 |
| 2185 | 8 | T6045c0gli1_29_C_T | 219.3439 |
| 2186 | 8 | T9805c0g5i1_7_A_T  | 222.0379 |
| 2187 | 8 | T5357c0gli1_168_TC | 224.5545 |
| 2188 | 8 | T5357c0gli1_170_CA | 224.6982 |
| 2189 | 8 | T5357c0gli1_172_GG | 225.3801 |
| 2190 | 8 | T9592c0gli1_35_G_A | 226.5891 |
| 2191 | 8 | T6111c0gli1_65_TC_ | 227.8877 |
| 2192 | 8 | T8115c0gli1_46_C_T | 230.3147 |
| 2193 | 8 | T4213c0gli1_143_C_ | 231.984  |
| 2194 | 8 | T2204c0gli1_16_ACC | 234.1123 |
| 2195 | 8 | T7560c0gli1_120_C_ | 236.633  |
| 2196 | 8 | T13195c2g13i2_238_ | 239.6976 |
| 2197 | 8 | T741c0gli1_29_T_C  | 242.1078 |
| 2198 | 8 | T7536c0gli1_251_T_ | 246.0312 |

|      |   |                    |          |
|------|---|--------------------|----------|
| 2199 | 8 | T2358c0gli1_467_CG | 251.7321 |
| 2200 | 8 | T2358c0gli1_466_CC | 251.7971 |
| 2201 | 9 | T12536c0gli1_13_GA | 0        |
| 2202 | 9 | T4944c0gli1_386_TT | 2.4825   |
| 2203 | 9 | T5563c0g2i1_220_A_ | 4.1008   |
| 2204 | 9 | T5563c0g2i1_219_A_ | 4.1392   |
| 2205 | 9 | T2952c1g2i1_271_A_ | 5.9645   |
| 2206 | 9 | T2952c1g2i1_268_A_ | 6.5986   |
| 2207 | 9 | T2952c1g2i1_247_T_ | 7.119    |
| 2208 | 9 | T2952c1g2i1_209_G_ | 8.2347   |
| 2209 | 9 | T2952c1g2i1_178_A_ | 8.843    |
| 2210 | 9 | T12563c0gli1_590_A | 9.871    |
| 2211 | 9 | T10578c0gli1_96_CT | 10.7946  |
| 2212 | 9 | T4199c0gli1_78_ATT | 11.4579  |
| 2213 | 9 | T12876c0gli1_221_G | 12.39    |
| 2214 | 9 | T13213c6g5i1_463_T | 13.0407  |
| 2215 | 9 | T5961c0gli1_19_CTG | 13.6618  |
| 2216 | 9 | T5961c0gli1_168_T_ | 14.1356  |
| 2217 | 9 | T426c0gli1_253_C_T | 14.7926  |
| 2218 | 9 | T5781c0g2i1_45_A_C | 15.2391  |
| 2219 | 9 | T1333c0g2i1_342_TT | 15.9224  |
| 2220 | 9 | T1682c0gli1_26_G_T | 16.828   |
| 2221 | 9 | T9380c0gli1_290_A_ | 17.9394  |
| 2222 | 9 | T10997c0gli1_48_G_ | 20.6592  |
| 2223 | 9 | T4199c0gli1_88_T_T | 24.7038  |
| 2224 | 9 | T4199c0gli1_75_GTT | 25.3323  |
| 2225 | 9 | T11964c4gli1_122_A | 30.294   |
| 2226 | 9 | T5476c0gli1_245_GT | 35.2578  |
| 2227 | 9 | T8050c0gli1_279_G_ | 37.1032  |
| 2228 | 9 | T8050c0gli1_177_C_ | 37.5684  |
| 2229 | 9 | T8050c0gli1_154_T_ | 39.4992  |
| 2230 | 9 | T151c0gli1_162_A_G | 44.3925  |
| 2231 | 9 | T1392c0gli1_52_C_A | 46.5805  |
| 2232 | 9 | T12273c0g2i1_168_T | 49.0417  |
| 2233 | 9 | T12273c0g2i1_278_A | 49.9528  |
| 2234 | 9 | T2509c0gli1_48_T_G | 51.9026  |
| 2235 | 9 | T2509c0gli1_8_C_G  | 51.9091  |
| 2236 | 9 | T327c0g2i1_256_G_A | 53.1144  |
| 2237 | 9 | T6660c0gli1_204_G_ | 54.3127  |
| 2238 | 9 | T2969c0gli1_163_G_ | 56.3755  |
| 2239 | 9 | T8437c0gli1_149_G_ | 58.9486  |
| 2240 | 9 | T3388c0g2i1_98_A_C | 61.5638  |
| 2241 | 9 | T3388c0g2i1_75_G_C | 62.3322  |
| 2242 | 9 | T3388c0g2i1_160_T_ | 62.4129  |

|      |   |                    |          |
|------|---|--------------------|----------|
| 2243 | 9 | T8768c2gli2_37_C_A | 63.5906  |
| 2244 | 9 | T6755c0gli1_184_T_ | 64.6273  |
| 2245 | 9 | T11650c1gli1_215_A | 65.6087  |
| 2246 | 9 | T11702c1gli1_342_A | 69.231   |
| 2247 | 9 | T5868c0gli1_107_AC | 73.067   |
| 2248 | 9 | T5868c0gli1_53_T_G | 73.7912  |
| 2249 | 9 | T5868c0gli1_55_A_G | 73.9889  |
| 2250 | 9 | T5868c0gli1_85_GA_ | 74.8333  |
| 2251 | 9 | T5464c0gli1_40_T_A | 77.5124  |
| 2252 | 9 | T5464c0gli1_95_G_A | 78.3119  |
| 2253 | 9 | T5464c0gli1_297_G_ | 78.4346  |
| 2254 | 9 | T5464c0gli1_281_C_ | 78.4778  |
| 2255 | 9 | T9137c0gli1_181_T_ | 79.2695  |
| 2256 | 9 | T12294c0gli1_230_T | 80.6618  |
| 2257 | 9 | T1484c0gli1_686_T_ | 81.7562  |
| 2258 | 9 | T4793c0g2i1_199_T_ | 82.7491  |
| 2259 | 9 | T3726c0g2i1_48_G_G | 83.7462  |
| 2260 | 9 | T3726c0g2i1_9_T_G  | 84.0473  |
| 2261 | 9 | T4925c0g2i1_512_T_ | 85.3087  |
| 2262 | 9 | T5555c0g2i1_184_T_ | 87.0097  |
| 2263 | 9 | T8900c0g2i1_32_T_G | 89.2286  |
| 2264 | 9 | T4889c0g2i2_130_G_ | 92.8507  |
| 2265 | 9 | T4889c0g2i2_132_A_ | 92.9043  |
| 2266 | 9 | T7230c0gli1_125_G_ | 95.3842  |
| 2267 | 9 | T10256c0gli1_427_C | 96.8954  |
| 2268 | 9 | T8565c0gli1_42_TTC | 97.5701  |
| 2269 | 9 | T4579c0gli1_144_C_ | 98.4524  |
| 2270 | 9 | T9249c0gli1_372_AA | 99.2973  |
| 2271 | 9 | T9249c0gli1_371_TA | 99.8508  |
| 2272 | 9 | T10629c0gli1_335_A | 101.1819 |
| 2273 | 9 | T11837c0gli1_148_G | 102.5721 |
| 2274 | 9 | T3943c0gli1_725_C_ | 104.2132 |
| 2275 | 9 | T945c0gli1_297_T_G | 107.5199 |
| 2276 | 9 | T945c0gli1_244_AGC | 107.8639 |
| 2277 | 9 | T2241c0gli1_121_C_ | 108.6921 |
| 2278 | 9 | T11788c0gli1_126_G | 109.591  |
| 2279 | 9 | T11788c0gli1_11_A_ | 109.7021 |
| 2280 | 9 | T11788c0gli1_53_G_ | 109.7577 |
| 2281 | 9 | T5830c0gli1_266_GT | 110.3323 |
| 2282 | 9 | T5830c0gli1_258_CT | 110.4468 |
| 2283 | 9 | T5830c0gli1_64_T_A | 110.5316 |
| 2284 | 9 | T5830c0gli1_147_T_ | 110.6713 |
| 2285 | 9 | T10229c0gli1_142_G | 112.2235 |
| 2286 | 9 | T10229c0gli1_88_T_ | 112.3837 |

|      |   |                    |          |
|------|---|--------------------|----------|
| 2287 | 9 | T10229c0gli1_15_T_ | 112.503  |
| 2288 | 9 | T5697c0gli1_104_GA | 114.6725 |
| 2289 | 9 | T2355c0gli1_170_C_ | 116.2286 |
| 2290 | 9 | T11765c1gli1_122_A | 117.5277 |
| 2291 | 9 | T11765c1gli1_128_C | 117.9355 |
| 2292 | 9 | T11765c1gli1_81_A_ | 118.2457 |
| 2293 | 9 | T5140c0gli1_22_T_C | 119.1993 |
| 2294 | 9 | T2994c0gli1_116_T_ | 119.9629 |
| 2295 | 9 | T11060c0gli1_202_T | 120.6324 |
| 2296 | 9 | T6472c0gli1_126_C_ | 121.2214 |
| 2297 | 9 | T2832c0gli1_356_AT | 121.7964 |
| 2298 | 9 | T5304c0gli1_103_T_ | 122.3551 |
| 2299 | 9 | T5304c0gli1_196_T_ | 122.6405 |
| 2300 | 9 | T471c0gli1_186_A_G | 123.5841 |
| 2301 | 9 | T471c0gli1_148_T_G | 123.7497 |
| 2302 | 9 | T75c0gli1_179_A_G  | 126.817  |
| 2303 | 9 | T7856c7gli1_460_C_ | 131.7302 |
| 2304 | 9 | T11972c4g5i1_196_T | 137.0345 |
| 2305 | 9 | T12635c0gli1_106_G | 142.5635 |
| 2306 | 9 | T12635c0gli1_102_A | 142.798  |
| 2307 | 9 | T5339c0gli1_104_C_ | 146.5855 |
| 2308 | 9 | T8074c0gli1_158_G_ | 147.8856 |
| 2309 | 9 | T6570c0gli1_185_TA | 150.5837 |
| 2310 | 9 | T6570c0gli1_61_T_C | 150.6999 |
| 2311 | 9 | T6570c0gli1_144_T_ | 150.7856 |
| 2312 | 9 | T584c0gli1_134_G_A | 151.225  |
| 2313 | 9 | T8492c0gli1_78_C_T | 151.2858 |
| 2314 | 9 | T6180c0gli1_83_ACC | 151.5049 |
| 2315 | 9 | T6180c0gli1_331_C_ | 151.6762 |
| 2316 | 9 | T2407c0gli1_110_G_ | 152.0565 |
| 2317 | 9 | T2996c0gli1_26_G_C | 153.1877 |
| 2318 | 9 | T2996c0gli1_25_A_C | 153.2145 |
| 2319 | 9 | T5423c0gli1_442_G_ | 154.1568 |
| 2320 | 9 | T4918c1gli1_73_C_T | 155.001  |
| 2321 | 9 | T8455c1g2i1_78_T_C | 156.127  |
| 2322 | 9 | T2916c0gli1_43_CG_ | 157.0804 |
| 2323 | 9 | T3915c0gli1_666_A_ | 157.4084 |
| 2324 | 9 | T3915c0gli1_135_A_ | 157.9368 |
| 2325 | 9 | T3915c0gli1_73_AGA | 158.1633 |
| 2326 | 9 | T103c0gli1_67_GTCC | 159.1952 |
| 2327 | 9 | T103c0gli1_280_G_C | 160.1001 |
| 2328 | 9 | T3717c0gli1_237_A_ | 161.1154 |
| 2329 | 9 | T4944c0gli1_480_CG | 162.1726 |
| 2330 | 9 | T815c0gli1_109_T_G | 163.4245 |

|      |   |                    |          |
|------|---|--------------------|----------|
| 2331 | 9 | T5451c0gli1_110_GC | 164.7815 |
| 2332 | 9 | T5451c0gli1_108_CA | 165.056  |
| 2333 | 9 | T5451c0gli1_113_AT | 165.0851 |
| 2334 | 9 | T6512c0gli1_163_AG | 168.0019 |
| 2335 | 9 | T481c0gli1_28_C_A  | 172.4859 |
| 2336 | 9 | T9230c0gli1_279_T_ | 175.2749 |
| 2337 | 9 | T9230c0gli1_268_T_ | 175.3079 |
| 2338 | 9 | T10827c0gli1_227_C | 177.1284 |
| 2339 | 9 | T262c0gli1_95_A_C  | 180.023  |
| 2340 | 9 | T7511c0gli1_279_T_ | 181.4174 |
| 2341 | 9 | T7511c0gli1_135_T_ | 181.592  |
| 2342 | 9 | T7511c0gli1_276_T_ | 181.6473 |
| 2343 | 9 | T7511c0gli1_89_T_A | 182.871  |
| 2344 | 9 | T12676c0gli1_197_G | 186.0615 |
| 2345 | 9 | T7373c0gli1_106_A_ | 187.2737 |
| 2346 | 9 | T4429c0gli1_202_C_ | 188.7816 |
| 2347 | 9 | T4429c0gli1_246_C_ | 189.4857 |
| 2348 | 9 | T4429c0gli1_257_G_ | 189.5634 |
| 2349 | 9 | T4429c0gli1_314_C_ | 189.6016 |
| 2350 | 9 | T11836c0gli1_66_A_ | 191.5961 |
| 2351 | 9 | T640c0gli1_61_T_C  | 193.5543 |
| 2352 | 9 | T9889c1g2i1_117_C_ | 195.104  |
| 2353 | 9 | T10690c0gli1_32_G_ | 197.2764 |
| 2354 | 9 | T9232c0gli1_165_G_ | 198.9797 |
| 2355 | 9 | T11469c0gli1_46_C_ | 201.6308 |
| 2356 | 9 | T6651c0gli1_281_T_ | 203.5634 |
| 2357 | 9 | T4994c0gli1_124_T_ | 205.7076 |
| 2358 | 9 | T4994c0gli1_70_T_C | 205.9424 |
| 2359 | 9 | T4994c0gli1_73_A_C | 206.1169 |
| 2360 | 9 | T4994c0gli1_100_A_ | 206.5958 |
| 2361 | 9 | T5701c0gli1_30_G_A | 207.9862 |
| 2362 | 9 | T1128c0gli1_330_T_ | 209.4834 |
| 2363 | 9 | T1128c0gli1_75_G_A | 209.6615 |
| 2364 | 9 | T1128c0gli1_35_T_C | 209.6971 |
| 2365 | 9 | T1300c0g2i1_317_A_ | 211.9508 |
| 2366 | 9 | T315c0gli1_54_A_C  | 216.8158 |
| 2367 | 9 | T13043c0gli1_86_G_ | 220.6171 |
| 2368 | 9 | T132c0gli1_647_G_T | 222.8923 |
| 2369 | 9 | T2068c0gli1_592_GT | 225.729  |
| 2370 | 9 | T2068c0gli1_586_AA | 226.6179 |
| 2371 | 9 | T2068c0gli1_587_AT | 226.8084 |
| 2372 | 9 | T2068c0gli1_516_G_ | 228.5688 |
| 2373 | 9 | T2068c0gli1_502_G_ | 229.1059 |
| 2374 | 9 | T13064c0gli1_607_T | 231.0234 |

|      |   |                    |          |
|------|---|--------------------|----------|
| 2375 | 9 | T13565c0gli1_45_G_ | 233.2286 |
| 2376 | 9 | T4523c0gli1_337_T_ | 235.767  |
| 2377 | 9 | T4523c0gli1_141_G_ | 237.5221 |
| 2378 | 9 | T11205c0gli1_281_C | 239.664  |
| 2379 | 9 | T2780c0gli1_311_T_ | 240.7162 |
| 2380 | 9 | T5561c0gli1_183_A_ | 241.3088 |
| 2381 | 9 | T1333c0g2i1_282_G_ | 242.2312 |
| 2382 | 9 | T1431c0gli1_252_TT | 243.1699 |
| 2383 | 9 | T1431c0gli1_251_TT | 243.7392 |
| 2384 | 9 | T4657c0gli1_176_C_ | 246.2263 |
| 2385 | 9 | T12596c0gli1_339_A | 249.844  |
| 2386 | 9 | T12596c0gli1_28_G_ | 250.2833 |
| 2387 | 9 | T12596c0gli1_305_G | 251.0541 |
| 2388 | 9 | T9889c1g2i1_175_T_ | 253.7615 |
| 2389 | 9 | T9889c1g2i1_223_T_ | 254.4011 |
| 2390 | 9 | T2964c0g8i1_229_T_ | 259.0725 |
| 2391 | 9 | T2964c0g8i1_256_A_ | 260.3117 |
| 2392 | 9 | T2964c0g8i1_188_C_ | 262.377  |
| 2393 | 9 | T11307c0gli1_221_A | 263.5045 |
| 2394 | 9 | T4467c0gli1_74_A_C | 264.1427 |
| 2395 | 9 | T5781c0gli1_45_A_C | 264.9919 |
| 2396 | 9 | T3090c0gli1_213_G_ | 266.0358 |
| 2397 | 9 | T12866c0gli1_148_G | 267.254  |
| 2398 | 9 | T13565c0gli1_180_G | 268.189  |
| 2399 | 9 | T3689c0gli1_254_T_ | 269.4776 |
| 2400 | 9 | T3689c0gli1_301_CG | 270.0566 |
| 2401 | 9 | T3689c0gli1_212_G_ | 270.7776 |
| 2402 | 9 | T3229c0gli1_182_T_ | 271.3687 |
| 2403 | 9 | T3229c0gli1_213_A_ | 271.6054 |
| 2404 | 9 | T3710c0gli1_458_T_ | 272.5045 |
| 2405 | 9 | T498c1gli1_139_C_C | 273.4447 |
| 2406 | 9 | T12809c0gli1_173_A | 274.9952 |
| 2407 | 9 | T12809c0gli1_215_G | 275.4063 |
| 2408 | 9 | T3374c0g2i1_47_G_C | 277.0748 |
| 2409 | 9 | T2068c0gli1_193_A_ | 279.1331 |
| 2410 | 9 | T5350c0gli1_180_AC | 282.6218 |
| 2411 | 9 | T5350c0gli1_181_CT | 282.8553 |
| 2412 | 9 | T5350c0gli1_176_TT | 284.4382 |
| 2413 | 9 | T6813c0gli1_150_G_ | 285.5431 |
| 2414 | 9 | T12525c0gli1_316_T | 287.0462 |
| 2415 | 9 | T4967c0gli1_314_G_ | 288.6293 |
| 2416 | 9 | T10256c0gli1_209_A | 289.6468 |
| 2417 | 9 | T12804c0gli1_340_A | 290.7119 |
| 2418 | 9 | T1547c0gli1_272_T_ | 292.2198 |



|      |    |                    |          |
|------|----|--------------------|----------|
| 2419 | 9  | T2176c0gli1_516_AA | 293.2617 |
| 2420 | 9  | T2176c0gli1_518_TT | 293.2975 |
| 2421 | 9  | T10578c0gli1_6_CTT | 294.0902 |
| 2422 | 9  | T3229c0gli1_97_CTT | 294.6827 |
| 2423 | 9  | T3229c0gli1_91_CTC | 294.8759 |
| 2424 | 9  | T3229c0gli1_127_A_ | 295.101  |
| 2425 | 9  | T3229c0gli1_129_T_ | 295.3578 |
| 2426 | 9  | T6965c0g2i1_397_G_ | 296.6146 |
| 2427 | 9  | T6965c0g2i1_393_G_ | 296.7759 |
| 2428 | 9  | T6965c0g2i1_434_G_ | 297.1329 |
| 2429 | 9  | T6965c0g2i1_435_GT | 297.4623 |
| 2430 | 9  | T10582c0gli1_95_G_ | 298.7851 |
| 2431 | 9  | T2358c0gli1_11_T_A | 299.721  |
| 2432 | 9  | T2358c0gli1_468_G_ | 300.3269 |
| 2433 | 9  | T377c0gli1_31_T_C  | 301.1249 |
| 2434 | 9  | T1717c1gli2_155_A_ | 301.812  |
| 2435 | 9  | T4586c0gli1_162_C_ | 302.6388 |
| 2436 | 9  | T4586c0gli1_22_G_T | 303.1375 |
| 2437 | 9  | T12563c0gli1_774_C | 303.9487 |
| 2438 | 9  | T11358c0gli1_669_T | 304.7421 |
| 2439 | 9  | T10942c0gli1_187_C | 305.8973 |
| 2440 | 9  | T2591c0gli1_146_T_ | 306.8348 |
| 2441 | 9  | T11990c0gli1_340_G | 307.5697 |
| 2442 | 9  | T9249c0gli1_317_G_ | 308.5365 |
| 2443 | 9  | T8221c0gli1_501_C_ | 309.7618 |
| 2444 | 9  | T2712c0gli1_238_AC | 310.864  |
| 2445 | 9  | T3487c0gli1_99_TGT | 312.2904 |
| 2446 | 9  | T3487c0gli1_100_GT | 312.4016 |
| 2447 | 9  | T13768c0gli1_78_C_ | 314.5122 |
| 2448 | 9  | T13768c0gli1_88_G_ | 314.6744 |
| 2449 | 9  | T12833c0gli1_406_C | 317.3297 |
| 2450 | 10 | T2988c0gli1_321_G_ | 0        |
| 2451 | 10 | T2988c0gli1_331_G_ | 0.0378   |
| 2452 | 10 | T2988c0gli1_306_G_ | 0.1837   |
| 2453 | 10 | T2988c0gli1_21_G_A | 0.4876   |
| 2454 | 10 | T2988c0gli1_9_G_A  | 0.5245   |
| 2455 | 10 | T2988c0gli1_372_G_ | 1.0266   |
| 2456 | 10 | T2988c0gli1_49_C_T | 1.7483   |
| 2457 | 10 | T2988c0gli1_384_C_ | 3.5253   |
| 2458 | 10 | T11866c0gli1_105_C | 6.777    |
| 2459 | 10 | T11866c0gli1_279_A | 8.5603   |
| 2460 | 10 | T11866c0gli1_283_G | 8.8106   |
| 2461 | 10 | T3014c0gli1_433_C_ | 12.2729  |
| 2462 | 10 | T3014c0gli1_136_A_ | 12.8533  |

|      |    |                    |         |
|------|----|--------------------|---------|
| 2463 | 10 | T3014c0gli1_79_C_C | 13.2002 |
| 2464 | 10 | T3014c0gli1_87_C_G | 13.5392 |
| 2465 | 10 | T7565c0gli1_138_G_ | 17.7061 |
| 2466 | 10 | T7565c0gli1_131_C_ | 17.7882 |
| 2467 | 10 | T3322c0g2i1_210_G_ | 20.2696 |
| 2468 | 10 | T8900c0g2i1_328_TA | 21.5322 |
| 2469 | 10 | T6136c0gli1_472_A_ | 23.5598 |
| 2470 | 10 | T6136c0gli1_466_GC | 23.7205 |
| 2471 | 10 | T6136c0gli1_467_CA | 23.7581 |
| 2472 | 10 | T3717c0gli1_274_T_ | 25.9327 |
| 2473 | 10 | T2967c0gli1_339_A_ | 27.4001 |
| 2474 | 10 | T5563c0g2i1_250_A_ | 28.1016 |
| 2475 | 10 | T5961c0gli1_219_C_ | 28.9827 |
| 2476 | 10 | T556c1gli1_138_G_A | 30.1407 |
| 2477 | 10 | T5023c0gli1_416_T_ | 30.8962 |
| 2478 | 10 | T4944c0gli1_261_G_ | 32.1215 |
| 2479 | 10 | T4944c0gli1_37_G_A | 32.6507 |
| 2480 | 10 | T4944c0gli1_75_A_G | 32.7739 |
| 2481 | 10 | T4944c0gli1_46_GGG | 32.9588 |
| 2482 | 10 | T4944c0gli1_53_CTG | 33.3853 |
| 2483 | 10 | T4944c0gli1_54_TGG | 33.4177 |
| 2484 | 10 | T11715c0g2i1_156_T | 34.8636 |
| 2485 | 10 | T2798c0gli1_37_C_A | 35.6917 |
| 2486 | 10 | T3726c0g2i1_68_T_G | 36.6079 |
| 2487 | 10 | T3726c0g2i1_90_T_G | 37.0916 |
| 2488 | 10 | T6466c0gli1_308_T_ | 38.7246 |
| 2489 | 10 | T3374c0g2i1_150_C_ | 41.5488 |
| 2490 | 10 | T1274c0gli1_51_T_C | 43.6594 |
| 2491 | 10 | T5886c0gli1_131_GA | 45.22   |
| 2492 | 10 | T5886c0gli1_130_GG | 45.3813 |
| 2493 | 10 | T5886c0gli1_129_GG | 45.4882 |
| 2494 | 10 | T11531c0gli1_192_T | 47.4476 |
| 2495 | 10 | T9587c1g2i1_235_CT | 49.4598 |
| 2496 | 10 | T9587c1g2i1_234_CC | 49.5245 |
| 2497 | 10 | T3723c0gli1_99_G_T | 51.8456 |
| 2498 | 10 | T3723c0gli1_95_A_C | 51.9001 |
| 2499 | 10 | T4808c0gli1_312_T_ | 53.7104 |
| 2500 | 10 | T9091c2gli1_167_T_ | 55.4227 |
| 2501 | 10 | T12435c0gli1_132_G | 56.689  |
| 2502 | 10 | T76c0gli1_414_C_T  | 57.8969 |
| 2503 | 10 | T11700c0gli1_93_C_ | 58.831  |
| 2504 | 10 | T1333c0g2i1_124_GG | 59.7575 |
| 2505 | 10 | T1333c0g2i1_125_GA | 59.9227 |
| 2506 | 10 | T1333c0g2i1_77_A_G | 60.3482 |

|      |    |                    |          |
|------|----|--------------------|----------|
| 2507 | 10 | T1333c0g2i1_53_T_A | 61.2012  |
| 2508 | 10 | T1333c0g2i1_54_T_A | 61.2277  |
| 2509 | 10 | T3324c0gli1_134_T_ | 63.6742  |
| 2510 | 10 | T4182c0gli1_209_A_ | 67.5048  |
| 2511 | 10 | T8780c0gli1_64_C_A | 71.4334  |
| 2512 | 10 | T3661c0gli1_61_G_A | 73.7904  |
| 2513 | 10 | T11753c0gli1_301_A | 76.7573  |
| 2514 | 10 | T1707c0gli1_187_T_ | 79.8811  |
| 2515 | 10 | T10686c0gli1_247_A | 84.2769  |
| 2516 | 10 | T4776c0gli1_47_A_G | 87.1706  |
| 2517 | 10 | T1770c0gli1_161_AT | 88.5095  |
| 2518 | 10 | T1770c0gli1_160_AA | 88.6216  |
| 2519 | 10 | T1770c0gli1_159_GA | 88.7945  |
| 2520 | 10 | T4866c0gli1_140_A_ | 91.1732  |
| 2521 | 10 | T2669c0gli1_153_G_ | 93.0572  |
| 2522 | 10 | T13563c0gli1_107_C | 94.5167  |
| 2523 | 10 | T2840c0gli1_162_T_ | 95.6982  |
| 2524 | 10 | T11935c1gli1_74_T_ | 97.3535  |
| 2525 | 10 | T4171c0gli1_34_C_A | 99.2096  |
| 2526 | 10 | T6140c0gli2_175_G_ | 101.1068 |
| 2527 | 10 | T12965c0gli1_408_T | 103.705  |
| 2528 | 10 | T12965c0gli1_176_G | 104.4671 |
| 2529 | 10 | T6462c1gli1_318_CT | 105.0729 |
| 2530 | 10 | T6462c1gli1_312_TC | 105.2338 |
| 2531 | 10 | T7164c0gli1_136_A_ | 105.6107 |
| 2532 | 10 | T4452c0gli1_45_T_G | 106.1536 |
| 2533 | 10 | T13529c0gli1_501_A | 106.9445 |
| 2534 | 10 | T109c0g2i1_215_G_A | 107.7093 |
| 2535 | 10 | T109c0g2i1_238_GT_ | 107.9357 |
| 2536 | 10 | T2171c0gli1_64_T_C | 108.4733 |
| 2537 | 10 | T2403c0gli1_147_A_ | 109.0856 |
| 2538 | 10 | T2403c0gli1_144_G_ | 109.1373 |
| 2539 | 10 | T2403c0gli1_173_C_ | 109.4345 |
| 2540 | 10 | T10389c0gli1_117_T | 110.2271 |
| 2541 | 10 | T11637c0gli1_688_C | 111.236  |
| 2542 | 10 | T5425c0gli1_544_CC | 112.4048 |
| 2543 | 10 | T1559c0g2i1_569_A_ | 113.6696 |
| 2544 | 10 | T12591c1gli1_230_C | 115.0731 |
| 2545 | 10 | T5007c0gli1_146_C_ | 116.4629 |
| 2546 | 10 | T3717c0gli1_399_G_ | 118.0998 |
| 2547 | 10 | T12554c0gli1_398_G | 120.2297 |
| 2548 | 10 | T2520c0g2i1_288_G_ | 121.9549 |
| 2549 | 10 | T2520c0g2i1_205_A_ | 123.464  |
| 2550 | 10 | T2171c0gli1_253_A_ | 125.071  |

|      |    |                    |          |
|------|----|--------------------|----------|
| 2551 | 10 | T10451c0gli1_157_A | 127.0146 |
| 2552 | 10 | T1300c0g2i1_316_CA | 129.3894 |
| 2553 | 10 | T1300c0g2i1_315_CC | 130.5987 |
| 2554 | 10 | T3323c0gli1_61_T_A | 134.1975 |
| 2555 | 10 | T9936c0gli1_45_G_A | 137.7385 |
| 2556 | 10 | T11001c0gli1_170_A | 140.479  |
| 2557 | 10 | T10974c0gli1_187_T | 142.7074 |
| 2558 | 10 | T6064c0gli1_54_CCT | 144.4011 |
| 2559 | 10 | T6064c0gli1_53_CCC | 144.5884 |
| 2560 | 10 | T12547c0gli1_224_G | 145.9628 |
| 2561 | 10 | T12547c0gli1_223_G | 145.9904 |
| 2562 | 10 | T12547c0gli1_222_G | 146.2456 |
| 2563 | 10 | T5425c0gli1_290_T_ | 147.9531 |
| 2564 | 10 | T1505c1gli1_162_G_ | 149.8957 |
| 2565 | 10 | T567c0gli1_17_C_A  | 152.274  |
| 2566 | 10 | T7512c0gli1_238_AT | 154.2541 |
| 2567 | 10 | T7512c0gli1_240_CG | 154.3241 |
| 2568 | 10 | T6813c0gli1_123_A_ | 156.2468 |
| 2569 | 10 | T2952c1g2i1_354_GG | 158.3511 |
| 2570 | 10 | T2952c1g2i1_282_A_ | 159.8279 |
| 2571 | 10 | T2952c1g2i1_290_G_ | 161.3731 |
| 2572 | 10 | T2952c1g2i1_363_C_ | 162.6252 |

| Group | Total length (cM) |
|-------|-------------------|
| 2     | 121.0303          |
| 6     | 143.2201          |
| 10    | 162.6252          |
| 7     | 195.0986          |
| 3     | 197.1938          |
| 1     | 248.944           |
| 8     | 251.7971          |
| 4     | 294.193           |
| 5     | 295.33            |
| 9     | 317.3297          |
|       | 2226.762          |
