# Supplementary material for: Construction of a high-density linkage map and QTL mapping for important agronomic traits in Stylosanthes guianensis (Aubl.) Sw
Source: PubMed Central journal article supplement (PMC6405868; doi:10.1038/s41598-019-40489-7), 2019-03-07
Supplement: 41598_2019_40489_MOESM2_ESM.pdf [file 41598_2019_40489_MOESM2_ESM.pdf]

**Construction of a high-density linkage map and QTL mapping  
for important agronomic traits in *Stylosanthes guianensis* (Aubl.)**

Sw.

Yan-Qiong Tang<sup>1\*</sup>, Zhi-Qiang Xia<sup>2\*</sup>, Ze-Ting Ding<sup>1\*</sup>, Ya-Cao Ding<sup>1</sup>, Zhu Liu<sup>1</sup>, Xiang Ma<sup>1</sup> &  
Jin-Ping Liu<sup>1</sup>

<sup>1</sup>Hainan Key Laboratory for Sustainable Utilization of Tropical Bioresources, Tropical Agriculture and Forestry Institute, Hainan University, Haikou, Hainan Province 570228, China. <sup>2</sup>The Institute of Tropical Bioscience and Biotechnology, Chinese Academy of Tropical Agricultural Sciences, Haikou, Hainan Province 571101, China

Correspondence and requests for materials should be addressed to Y.-Q. T. (tyq68@126.com) or J.-P. L. (liu3305602@163.com)

\* These authors contributed equally to this work.

Table S2. Yield-related phenotypic performance of TPRC1979 (female parent) and TPRCR273 (male parent) and their hybrid F<sub>1</sub> of *Stylosanthes guianensis*. FW: fresh weight; DW: dry weight; FW/DW: the fresh weight: dry weight ratio; PH: plant height; PBN: primary branch number; PW: plant width; LB: the maximum length of branches; LL: leaf length; LW: leaf width; LL/LW: the leaf length: leaf width ratio.

| Traits  | TPRCR273 | TPRC 1979 | Mean   | F <sub>1</sub> hybrid |
|---------|----------|-----------|--------|-----------------------|
| FW (Kg) | 3.21     | 5.11      | 4.16   | 4.52                  |
| FW/DW   | 3.33     | 3.74      | 3.54   | 3.61                  |
| DW (Kg) | 0.96     | 1.37      | 1.17   | 1.25                  |
| PH (cm) | 51.28    | 59.32     | 55.30  | 56.82                 |
| PBN     | 23       | 25        | 24     | 26                    |
| PW(cm)  | 146.60   | 163.85    | 155.23 | 158.32                |
| LB (cm) | 69.23    | 77.85     | 73.54  | 76.90                 |
| LL (cm) | 3.04     | 3.28      | 3.16   | 3.22                  |
| LW (cm) | 0.61     | 0.67      | 0.64   | 0.65                  |
| LL/LW   | 4.98     | 4.90      | 4.94   | 4.95                  |
