# Supplementary material for: Construction of a high-density linkage map and QTL mapping for important agronomic traits in Stylosanthes guianensis (Aubl.) Sw
Source: PubMed Central journal article supplement (PMC6405868; doi:10.1038/s41598-019-40489-7), 2019-03-07
Supplement: 41598_2019_40489_MOESM3_ESM.pdf [file 41598_2019_40489_MOESM3_ESM.pdf]

**Construction of a high-density linkage map and QTL mapping  
for important agronomic traits in *Stylosanthes guianensis* (Aubl.)**

Sw.

Yan-Qiong Tang<sup>1\*</sup>, Zhi-Qiang Xia<sup>2\*</sup>, Ze-Ting Ding<sup>1\*</sup>, Ya-Cao Ding<sup>1</sup>, Zhu Liu<sup>1</sup>, Xiang Ma<sup>1</sup> &  
Jin-Ping Liu<sup>1</sup>

<sup>1</sup>Hainan Key Laboratory for Sustainable Utilization of Tropical Bioresources, Tropical Agriculture and Forestry Institute, Hainan University, Haikou, Hainan Province 570228, China. <sup>2</sup>The Institute of Tropical Bioscience and Biotechnology, Chinese Academy of Tropical Agricultural Sciences, Haikou, Hainan Province 571101, China

Correspondence and requests for materials should be addressed to Y.-Q. T. (tyq68@126.com) or J.-P. L. (liu3305602@163.com)

\* These authors contributed equally to this work.

Table S3. Phenotype variations of the yield-related traits for F<sub>2</sub> population derived from the cross between TPRC1979 (female) and TPRCR273 (male) of *Stylosanthes guianensis*. CV: Coefficient of variation; FW: fresh weight; DW: dry weight; FW/DW: the fresh weight: dry weight ratio; PH: natural height; PBN: primary branch number; PW: plant width; LB: the maximum length of branches; LL: leaf length; LW: leaf width; LL/LW: the leaf length: leaf width ratio.

| Traits  | Mean   | St. D | Min   | Max    | Range  | CV(%) |
|---------|--------|-------|-------|--------|--------|-------|
| FW (Kg) | 4.30   | 1.99  | 0.42  | 12.08  | 11.66  | 46.19 |
| FW/DW   | 3.56   | 0.31  | 2.80  | 5.82   | 3.02   | 8.80  |
| DW(Kg)  | 1.21   | 0.54  | 0.14  | 3.05   | 2.91   | 44.84 |
| PH(cm)  | 57.87  | 17.97 | 20.23 | 98.47  | 78.24  | 31.05 |
| TBN     | 24.6   | 3.80  | 13    | 33     | 20     | 15.42 |
| PW(cm)  | 158.18 | 21.05 | 75.32 | 223.21 | 147.89 | 14.21 |
| LB(cm)  | 75.86  | 11.73 | 34.50 | 105.26 | 71.12  | 15.46 |
| LL(cm)  | 3.24   | 0.27  | 2.54  | 3.98   | 1.44   | 8.31  |
| LW(cm)  | 0.65   | 0.08  | 0.49  | 0.90   | 0.41   | 12.15 |
| LL/LW   | 5.05   | 0.57  | 3.78  | 6.86   | 3.08   | 11.33 |
