# Supplementary material for: Construction of a high-density linkage map and QTL mapping for important agronomic traits in Stylosanthes guianensis (Aubl.) Sw
Source: PubMed Central journal article supplement (PMC6405868; doi:10.1038/s41598-019-40489-7), 2019-03-07
Supplement: 41598_2019_40489_MOESM4_ESM.pdf [file 41598_2019_40489_MOESM4_ESM.pdf]

**Construction of a high-density linkage map and QTL mapping  
for important agronomic traits in *Stylosanthes guianensis* (Aubl.)**

Sw.

Yan-Qiong Tang<sup>1\*</sup>, Zhi-Qiang Xia<sup>2\*</sup>, Ze-Ting Ding<sup>1\*</sup>, Ya-Cao Ding<sup>1</sup>, Zhu Liu<sup>1</sup>, Xiang Ma<sup>1</sup> &  
Jin-Ping Liu<sup>1</sup>

<sup>1</sup>Hainan Key Laboratory for Sustainable Utilization of Tropical Bioresources, Tropical Agriculture and Forestry Institute, Hainan University, Haikou, Hainan Province 570228, China. <sup>2</sup>The Institute of Tropical Bioscience and Biotechnology, Chinese Academy of Tropical Agricultural Sciences, Haikou, Hainan Province 571101, China

Correspondence and requests for materials should be addressed to Y.-Q. T. (tyq68@126.com) or J.-P. L. (liu3305602@163.com)

\* These authors contributed equally to this work.

Table S4. Nutritional or quality-related phenotypic performance of TPRC1979 (female parent) and TPRCR273 (male parent) and their hybrid F<sub>1</sub> and F<sub>2</sub> of *Stylosanthes guianensis*. CV: Coefficient of variation.

| Nutrient contents | TPRCR273 | TPRC 1979 | mean  | F <sub>1</sub> Hybrid | Mean±S of F <sub>2</sub> | F value of F <sub>2</sub> | CV (%) of F <sub>2</sub> |
|-------------------|----------|-----------|-------|-----------------------|--------------------------|---------------------------|--------------------------|
| Crude protein     | 15.24    | 17.85     | 16.54 | 17.26                 | 16.57±1.79               | 7.85**                    | 10.83                    |
| Crude fiber       | 23.87    | 19.51     | 21.69 | 21.23                 | 23.53±2.47               | 5.76**                    | 10.48                    |
| Crude fat         | 3.01     | 3.20      | 3.11  | 3.17                  | 3.16±1.08                | 49.36**                   | 34.01                    |
| Crude ash         | 7.14     | 7.45      | 7.30  | 7.35                  | 8.17±0.84                | 13.51**                   | 10.32                    |
| Ca                | 1.15     | 0.86      | 1.01  | 1.04                  | 0.99±0.25                | 10.84**                   | 25.21                    |
| P                 | 0.21     | 0.22      | 0.22  | 0.27                  | 0.20±0.05                | 45.16**                   | 24.09                    |
| K                 | 1.62     | 1.84      | 1.73  | 1.82                  | 1.74±0.32                | 102.37**                  | 18.17                    |
| Mg                | 0.22     | 0.20      | 0.21  | 0.24                  | 0.29±0.06                | 26.00**                   | 19.93                    |
