# Supplementary material for: Construction of a high-density linkage map and QTL mapping for important agronomic traits in Stylosanthes guianensis (Aubl.) Sw
Source: PubMed Central journal article supplement (PMC6405868; doi:10.1038/s41598-019-40489-7), 2019-03-07
Supplement: 41598_2019_40489_MOESM5_ESM.pdf [file 41598_2019_40489_MOESM5_ESM.pdf]

**Construction of a high-density linkage map and QTL mapping  
for important agronomic traits in *Stylosanthes guianensis* (Aubl.)**

Sw.

Yan-Qiong Tang<sup>1\*</sup>, Zhi-Qiang Xia<sup>2\*</sup>, Ze-Ting Ding<sup>1\*</sup>, Ya-Cao Ding<sup>1</sup>, Zhu Liu<sup>1</sup>, Xiang Ma<sup>1</sup> &  
Jin-Ping Liu<sup>1</sup>

<sup>1</sup>Hainan Key Laboratory for Sustainable Utilization of Tropical Bioresources, Tropical Agriculture and Forestry Institute, Hainan University, Haikou, Hainan Province 570228, China. <sup>2</sup>The Institute of Tropical Bioscience and Biotechnology, Chinese Academy of Tropical Agricultural Sciences, Haikou, Hainan Province 571101, China

Correspondence and requests for materials should be addressed to Y.-Q. T. (tyq68@126.com) or J.-P. L. (liu3305602@163.com)

\* These authors contributed equally to this work.

Table S5. Shapiro-Wilk normality tests of the yield-related traits for F<sub>2</sub> population derived from the cross between TPRC1979 (female) and TPRCR273 (male) of *Stylosanthes guianensis*. FW: fresh weight; DW: dry weight; FW/DW: the fresh weight: dry weight ratio; PH: plant height; PBN: primary branch number; PW: plant width; LB: the maximum length of branches; LL: leaf length; LW: leaf width; LL/LW: the leaf length: leaf width ratio.

| Traits | Skewness | Kurtosis | Shapiro-Wilk tests |                 |
|--------|----------|----------|--------------------|-----------------|
|        |          |          | Statistic          | P values (pr<w) |
| FW     | 0.22     | -0.48    | 0.987              | 0.057           |
| FW/DW  | 1.88     | 12.45    | 0.893              | 0.000           |
| DW     | 0.37     | -0.02    | 0.987              | 0.070           |
| PH     | 0.14     | -0.66    | 0.986              | 0.053           |
| PBN    | -0.87    | 0.92     | 0.943              | 0.000           |
| PW     | 0.2      | 0.57     | 0.989              | 0.149           |
| LB     | 0.33     | 0.8      | 0.991              | 0.263           |
| LL     | 0.09     | 0.03     | 0.996              | 0.894           |
| LW     | 0.57     | 0.23     | 0.972              | 0.001           |
| LL/LW  | 0.43     | 0.2      | 0.987              | 0.078           |
