# Supplementary material for: Construction of a high-density linkage map and QTL mapping for important agronomic traits in Stylosanthes guianensis (Aubl.) Sw
Source: PubMed Central journal article supplement (PMC6405868; doi:10.1038/s41598-019-40489-7), 2019-03-07
Supplement: 41598_2019_40489_MOESM6_ESM.pdf [file 41598_2019_40489_MOESM6_ESM.pdf]

**Construction of a high-density linkage map and QTL mapping  
for important agronomic traits in *Stylosanthes guianensis* (Aubl.)**

Sw.

Yan-Qiong Tang<sup>1\*</sup>, Zhi-Qiang Xia<sup>2\*</sup>, Ze-Ting Ding<sup>1\*</sup>, Ya-Cao Ding<sup>1</sup>, Zhu Liu<sup>1</sup>, Xiang Ma<sup>1</sup> &  
Jin-Ping Liu<sup>1</sup>

<sup>1</sup>Hainan Key Laboratory for Sustainable Utilization of Tropical Bioresources, Tropical Agriculture and Forestry Institute, Hainan University, Haikou, Hainan Province 570228, China. <sup>2</sup>The Institute of Tropical Bioscience and Biotechnology, Chinese Academy of Tropical Agricultural Sciences, Haikou, Hainan Province 571101, China

Correspondence and requests for materials should be addressed to Y.-Q. T. (tyq68@126.com) or J.-P. L. (liu3305602@163.com)

\* These authors contributed equally to this work.

Table S6. Shapiro-Wilk normality tests of the nutritional or quality-related traits for F<sub>2</sub> population derived from the cross between TPRC1979 (female) and TPRCR273 (male) of *Stylosanthes guianensis*.

| Traits        | Kurtosis | Skewness | Shapiro-Wilk tests |                 |
|---------------|----------|----------|--------------------|-----------------|
|               |          |          | Statistic          | P values (pr<w) |
| Crude protein | 0.05     | 0.14     | 0.997              | 0.988           |
| Crude fiber   | -0.11    | 0.4      | 0.987              | 0.052           |
| Crude fat     | -0.14    | 0.69     | 0.988              | 0.079           |
| Crude ash     | 0.94     | 0.36     | 0.992              | 0.313           |
| Calcium       | 0.95     | 0.44     | 0.953              | 0.000           |
| Phosphate     | 0.99     | 0.89     | 0.919              | 0.000           |
| Potassium     | 0.17     | -0.63    | 0.965              | 0.000           |
| Magnesium     | 0.58     | 0.6      | 0.958              | 0.000           |
