# Supplementary material for: Construction of a high-density linkage map and QTL mapping for important agronomic traits in Stylosanthes guianensis (Aubl.) Sw
Source: PubMed Central journal article supplement (PMC6405868; doi:10.1038/s41598-019-40489-7), 2019-03-07
Supplement: 41598_2019_40489_MOESM7_ESM.pdf [file 41598_2019_40489_MOESM7_ESM.pdf]

**Construction of a high-density linkage map and QTL mapping  
for important agronomic traits in *Stylosanthes guianensis* (Aubl.)**

Sw.

Yan-Qiong Tang<sup>1\*</sup>, Zhi-Qiang Xia<sup>2\*</sup>, Ze-Ting Ding<sup>1\*</sup>, Ya-Cao Ding<sup>1</sup>, Zhu Liu<sup>1</sup>, Xiang Ma<sup>1</sup> &  
Jin-Ping Liu<sup>1</sup>

<sup>1</sup>Hainan Key Laboratory for Sustainable Utilization of Tropical Bioresources, Tropical Agriculture and Forestry Institute, Hainan University, Haikou, Hainan Province 570228, China. <sup>2</sup>The Institute of Tropical Bioscience and Biotechnology, Chinese Academy of Tropical Agricultural Sciences, Haikou, Hainan Province 571101, China

Correspondence and requests for materials should be addressed to Y.-Q. T. (tyq68@126.com) or J.-P. L. (liu3305602@163.com)

\* These authors contributed equally to this work.

Table S7. Correlation coefficients among the yield-related traits for F<sub>2</sub> population derived from the cross between TPRC1979 (female) and TPRCR273 (male) of *Stylosanthes guianensis*. FW: fresh weight; DW: dry weight; FW/DW: the fresh weight: dry weight ratio; PH: plant height; PBN: primary branch number; PW: plant width; LB: the maximum length of branches; LL: leaf length; LW: leaf width; LL/LW: the leaf length: leaf width ratio.

|       | FW      | PW      | PH      | LB      | PBN     | LL      | LW       | LL/LW |
|-------|---------|---------|---------|---------|---------|---------|----------|-------|
| FW    | 1       |         |         |         |         |         |          |       |
| PW    | 0.586** | 1       |         |         |         |         |          |       |
| PH    | 0.222** | 0.314** | 1       |         |         |         |          |       |
| LB    | 0.441** | 0.407** | 0.305** | 1       |         |         |          |       |
| PBN   | 0.461** | 0.419** | 0.183** | 0.457** | 1       |         |          |       |
| LL    | 0.586** | 0.476** | 0.189** | 0.309** | 0.292** | 1       |          |       |
| LW    | 0.354** | 0.194** | -0.049  | 0.138*  | 0.322** | 0.498** | 1        |       |
| LL/LW | 0.334** | 0.341** | 0.257** | 0.237*  | 0.463   | 0.666** | -0.305** | 1     |

\*\* . Correlation is significant at the 0.01 level; \* . Correlation is significant at the 0.05 level
