# Supplementary material for: Construction of a high-density linkage map and QTL mapping for important agronomic traits in Stylosanthes guianensis (Aubl.) Sw
Source: PubMed Central journal article supplement (PMC6405868; doi:10.1038/s41598-019-40489-7), 2019-03-07
Supplement: 41598_2019_40489_MOESM8_ESM.pdf [file 41598_2019_40489_MOESM8_ESM.pdf]

**Construction of a high-density linkage map and QTL mapping  
for important agronomic traits in *Stylosanthes guianensis* (Aubl.)**

Sw.

Yan-Qiong Tang<sup>1\*</sup>, Zhi-Qiang Xia<sup>2\*</sup>, Ze-Ting Ding<sup>1\*</sup>, Ya-Cao Ding<sup>1</sup>, Zhu Liu<sup>1</sup>, Xiang Ma<sup>1</sup> &  
Jin-Ping Liu<sup>1</sup>

<sup>1</sup>Hainan Key Laboratory for Sustainable Utilization of Tropical Bioresources, Tropical Agriculture and Forestry Institute, Hainan University, Haikou, Hainan Province 570228, China. <sup>2</sup>The Institute of Tropical Bioscience and Biotechnology, Chinese Academy of Tropical Agricultural Sciences, Haikou, Hainan Province 571101, China

Correspondence and requests for materials should be addressed to Y.-Q. T. (tyq68@126.com) or J.-P. L. (liu3305602@163.com)

\* These authors contributed equally to this work.

Table S8. Correlation coefficients among the nutritional or quality-related traits for F<sub>2</sub> population derived from the cross between TPRC1979 (female) and TPRCR273 (male) of *Stylosanthes guianensis*.

|               | Crude protein | Crude fiber | Crude fat | Crude ash | Ca       | P        | K           | Mg |
|---------------|---------------|-------------|-----------|-----------|----------|----------|-------------|----|
| Crude protein | 1             |             |           |           |          |          |             |    |
| Crude fiber   | -0.380**      | 1           |           |           |          |          |             |    |
| Crude fat     | 0.001         | 0.305**     | 1         |           |          |          |             |    |
| Crude ash     | 0.073         | -0.212**    | -0.070    | 1         |          |          |             |    |
| Ca            | -0.081        | -0.120      | 0.000     | 0.095     | 1        |          |             |    |
| P             | 0.198**       | -0.223**    | 0.075     | 0.097     | 0.224**  | 1        |             |    |
| K             | 0.087         | 0.076       | 0.214**   | 0.311**   | -0.394** | -0.193** | 1           |    |
| Mg            | -0.094        | -0.059      | -0.095    | 0.139*    | 0.455**  | 0.167*   | -0.151<br>* | 1  |

\*\* Correlation is significant at the 0.01 level; \* Correlation is significant at the 0.05 level
